# Supplementary material for: Integrated systems analysis reveals conserved gene networks underlying response to spinal cord injury
Source: eLife. 2018 Oct 2;7:e39188. doi: 10.7554/eLife.39188 (PMC6173583; doi:10.7554/eLife.39188)
Supplement: Supplementary file 1. [file elife-39188-supp1.xlsx]

## Sheet: Dataset S1
condition	level	type	time	species	strain	tissue	gene.name	accession	db	pmid	direction	technique	technique.subtype	ensembl
spinal cord injury	T9	transection	5d	10116	Wistar	spinal cord;parenchyma	Fatty acid-binding protein	P55051	UniProt	16372269	upregulated	proteomics	2-DE	ENSG00000164434
spinal cord injury	T9	transection	5d	10116	Wistar	spinal cord;parenchyma	Heat shock protein 27	P42930	UniProt	16372269	upregulated	proteomics	2-DE	ENSG00000106211
spinal cord injury	T9	transection	5d	10116	Wistar	spinal cord;parenchyma	Ubiquitin caboxyl-terminal hydrolase isozyme L1	Q00981	UniProt	16372269	upregulated	proteomics	2-DE	ENSG00000154277
spinal cord injury	T9	transection	5d	10116	Wistar	spinal cord;parenchyma	Galactose-specific lectin 3	P08699	UniProt	16372269	upregulated	proteomics	2-DE	ENSG00000131981
spinal cord injury	T9	transection	5d	10116	Wistar	spinal cord;parenchyma	Apolipoprotein A-I	P04639	UniProt	16372269	upregulated	proteomics	2-DE	ENSG00000118137
spinal cord injury	T9	transection	5d	10116	Wistar	spinal cord;parenchyma	cAMP-dependent protein kinase	P27791	UniProt	16372269	upregulated	proteomics	2-DE	ENSG00000072062
spinal cord injury	T9	transection	5d	10116	Wistar	spinal cord;parenchyma	Inhibitor of kabbaB kinase gamme	Q9QY78	UniProt	16372269	upregulated	proteomics	2-DE	ENSG00000104365
spinal cord injury	T9	transection	5d	10116	Wistar	spinal cord;parenchyma	Glial fibrillary acidic protein	P47819	UniProt	16372269	upregulated	proteomics	2-DE	ENSG00000131095
spinal cord injury	T9	transection	5d	10116	Wistar	spinal cord;parenchyma	p62 Dynactin	Q9QUR2	UniProt	16372269	upregulated	proteomics	2-DE	ENSG00000132912
spinal cord injury	T9	transection	5d	10116	Wistar	spinal cord;parenchyma	Dynein	Q9QXU8	UniProt	16372269	upregulated	proteomics	2-DE	ENSG00000144635
spinal cord injury	T9	transection	5d	10116	Wistar	spinal cord;parenchyma	Zinc finger protein 426	A1L1L7	UniProt	16372269	upregulated	proteomics	2-DE	ENSG00000130818
spinal cord injury	T9	transection	5d	10116	Wistar	spinal cord;parenchyma	Eukaryotic translation initiation factor 3	Q6AYK8	UniProt	16372269	upregulated	proteomics	2-DE	ENSG00000100353
spinal cord injury	T9	transection	5d	10116	Wistar	spinal cord;parenchyma	Corneal wound healing-related protein	Q6DKG0	UniProt	16372269	upregulated	proteomics	2-DE	ENSG00000135040
spinal cord injury	T9	transection	5d	10116	Wistar	spinal cord;parenchyma	Zinc finger protein 366	D4A715	UniProt	16372269	upregulated	proteomics	2-DE	ENSG00000178175
spinal cord injury	T9	transection	5d	10116	Wistar	spinal cord;parenchyma	ras-Related protein Rab-15	P35289	UniProt	16372269	upregulated	proteomics	2-DE	ENSG00000139998
spinal cord injury	T9	transection	5d	10116	Wistar	spinal cord;parenchyma	ER protein 29	P52555	UniProt	16372269	upregulated	proteomics	2-DE	ENSG00000089248
spinal cord injury	T9	transection	5d	10116	Wistar	spinal cord;parenchyma	Voltage-dependent anion channel 2	P81155	UniProt	16372269	upregulated	proteomics	2-DE	ENSG00000165637
spinal cord injury	T9	transection	5d	10116	Wistar	spinal cord;parenchyma	Cyclin D1	P39948	UniProt	16372269	upregulated	proteomics	2-DE	ENSG00000110092
spinal cord injury	T9	transection	5d	10116	Wistar	spinal cord;parenchyma	Hypothetical protein	Q4V9H5	UniProt	16372269	upregulated	proteomics	2-DE	ENSG00000129292
spinal cord injury	T9	transection	5d	10116	Wistar	spinal cord;parenchyma	Annexin III	P14669	UniProt	16372269	upregulated	proteomics	2-DE	ENSG00000138772
spinal cord injury	T9	transection	5d	10116	Wistar	spinal cord;parenchyma	5-Delta2,4-dienoyl-CoA isomerase	Q62651	UniProt	16372269	upregulated	proteomics	2-DE	ENSG00000104823
spinal cord injury	T9	transection	5d	10116	Wistar	spinal cord;parenchyma	GIn synthetase	P09606	UniProt	16372269	upregulated	proteomics	2-DE	ENSG00000135821
spinal cord injury	T9	transection	5d	10116	Wistar	spinal cord;parenchyma	Beta arrestin 2	P29067	UniProt	16372269	upregulated	proteomics	2-DE	ENSG00000141480
spinal cord injury	T9	transection	5d	10116	Wistar	spinal cord;parenchyma	Tubulin beta chain 15	Q3KRE8	UniProt	16372269	upregulated	proteomics	2-DE	ENSG00000137285
spinal cord injury	T9	transection	5d	10116	Wistar	spinal cord;parenchyma	Vimentin	P31000	UniProt	16372269	upregulated	proteomics	2-DE	ENSG00000026025
spinal cord injury	T9	transection	5d	10116	Wistar	spinal cord;parenchyma	Disulfide isomerase ER-60	P11598	UniProt	16372269	upregulated	proteomics	2-DE	ENSG00000167004
spinal cord injury	T9	transection	5d	10116	Wistar	spinal cord;parenchyma	Glutamate dehydrogenase, mitochondrial precursor	P10860	UniProt	16372269	upregulated	proteomics	2-DE	ENSG00000182890
spinal cord injury	T9	transection	5d	10116	Wistar	spinal cord;parenchyma	Glutamate dehydrogenase, mitochondrial precursor	P10860	UniProt	16372269	upregulated	proteomics	2-DE	ENSG00000148672
spinal cord injury	T9	transection	5d	10116	Wistar	spinal cord;parenchyma	Glypican	P51653	UniProt	16372269	upregulated	proteomics	2-DE	ENSG00000213420
spinal cord injury	T9	transection	5d	10116	Wistar	spinal cord;parenchyma	Cyclic nucleotide gated channel 2	Q00195	UniProt	16372269	upregulated	proteomics	2-DE	ENSG00000183862
spinal cord injury	T9	transection	5d	10116	Wistar	spinal cord;parenchyma	Transferrin	P12346	UniProt	16372269	upregulated	proteomics	2-DE	ENSG00000091513
spinal cord injury	T9	transection	5d	10116	Wistar	spinal cord;parenchyma	Phospholipase A2	P97570	UniProt	16372269	upregulated	proteomics	2-DE	ENSG00000184381
spinal cord injury	T9	transection	5d	10116	Wistar	spinal cord;parenchyma	11-Zinc finger protein	Q9R1D1	UniProt	16372269	upregulated	proteomics	2-DE	ENSG00000102974
spinal cord injury	T9	transection	1d	10116	Wistar	spinal cord;parenchyma	Voltage dependent anion channel 1	13786200	GI	16586436	upregulated	proteomics	2-DE	ENSG00000213585
spinal cord injury	T9	transection	1d	10116	Wistar	spinal cord;parenchyma	H+-transporting two-sector ATPase (EC 3.6.3.14) alpha chain precursor	P15999	UniProt	16586436	upregulated	proteomics	2-DE	ENSG00000152234
spinal cord injury	T9	transection	1d	10116	Wistar	spinal cord;parenchyma	Unknown (protein for MGC:93500)	56540994	GI	16586436	upregulated	proteomics	2-DE	ENSG00000091513
spinal cord injury	T9	transection	1d	10116	Wistar	spinal cord;parenchyma	Similar to RhoGDI-1	NP_001007006	RefSeq	16586436	upregulated	proteomics	2-DE	ENSG00000141522
spinal cord injury	T9	transection	1d	10116	Wistar	spinal cord;parenchyma	Similar to leucine aminopeptidase	NP_001011910	RefSeq	16586436	upregulated	proteomics	2-DE	ENSG00000002549
spinal cord injury	T9	transection	1d	10116	Wistar	spinal cord;parenchyma	Peroxiredoxin 2	34849738	GI	16586436	upregulated	proteomics	2-DE	ENSG00000167815
spinal cord injury	T9	transection	1d	10116	Wistar	spinal cord;parenchyma	Peroxiredoxin 6	16758348	GI	16586436	upregulated	proteomics	2-DE	ENSG00000117592
spinal cord injury	T9	transection	1d	10116	Wistar	spinal cord;parenchyma	Mitochondrial H+-ATP synthase alpha subunit	40538742	GI	16586436	upregulated	proteomics	2-DE	ENSG00000152234
spinal cord injury	T9	transection	1d	10116	Wistar	spinal cord;parenchyma	Phosphoglycerate mutase type B subunit	8248819	GI	16586436	upregulated	proteomics	2-DE	ENSG00000171314
spinal cord injury	T9	transection	1d	10116	Wistar	spinal cord;parenchyma	Pyruvate kinase 3	16757994	GI	16586436	upregulated	proteomics	2-DE	ENSG00000067225
spinal cord injury	T9	transection	1d	10116	Wistar	spinal cord;parenchyma	Aconitase 2, mitochrondrial	40538860	GI	16586436	upregulated	proteomics	2-DE	ENSG00000100412
spinal cord injury	T9	transection	1d	10116	Wistar	spinal cord;parenchyma	Albumin	NP_599153	RefSeq	16586436	upregulated	proteomics	2-DE	ENSG00000163631
spinal cord injury	T9	transection	1d	10116	Wistar	spinal cord;parenchyma	Apolipoprotein A-I precursor	P04639	UniProt	16586436	upregulated	proteomics	2-DE	ENSG00000118137
spinal cord injury	T9	transection	1d	10116	Wistar	spinal cord;parenchyma	Annexin 5	51858950	GI	16586436	upregulated	proteomics	2-DE	ENSG00000164111
spinal cord injury	T9	transection	1d	10116	Wistar	spinal cord;parenchyma	Annexin A2	9845234	GI	16586436	upregulated	proteomics	2-DE	ENSG00000182718
spinal cord injury	T9	transection	1d	10116	Wistar	spinal cord;parenchyma	Cyclic nucleotide phosphodiesterase 1	NP_036941	RefSeq	16586436	upregulated	proteomics	2-DE	ENSG00000173786
spinal cord injury	T9	transection	1d	10116	Wistar	spinal cord;parenchyma	Neurofilamint, light polypeptide	13929098	GI	16586436	upregulated	proteomics	2-DE	ENSG00000277586
spinal cord injury	T9	transection	1d	10116	Wistar	spinal cord;parenchyma	Glial fibrillary acidic protein delta	5030428	GI	16586436	upregulated	proteomics	2-DE	ENSG00000131095
spinal cord injury	T9	transection	1d	10116	Wistar	spinal cord;parenchyma	Tubulin, alpha 1	38328248	GI	16586436	upregulated	proteomics	2-DE	ENSG00000167552
spinal cord injury	T9	transection	1d	10116	Wistar	spinal cord;parenchyma	Tubulin beta chain 15	Q3KRE8	UniProt	16586436	upregulated	proteomics	2-DE	ENSG00000137285
spinal cord injury	T9	transection	1d	10116	Wistar	spinal cord;parenchyma	Peripherin	NP_036765	RefSeq	16586436	upregulated	proteomics	2-DE	ENSG00000135406
spinal cord injury	T9	transection	1d	10116	Wistar	spinal cord;parenchyma	Tumor rejection antigen gp96	NP_001012197	RefSeq	16586436	upregulated	proteomics	2-DE	ENSG00000166598
spinal cord injury	T9	transection	1d	10116	Wistar	spinal cord;parenchyma	Unknown (protein for MGC:94172)	50926985	GI	16586436	upregulated	proteomics	2-DE	ENSG00000136193
spinal cord injury	T9	transection	1d	10116	Wistar	spinal cord;parenchyma	FK506 binding protein 4	22324680	GI	16586436	upregulated	proteomics	2-DE	ENSG00000004478
spinal cord injury	T9	transection	1d	10116	Wistar	spinal cord;parenchyma	Unnamed protein product	Q6P9T8	UniProt	16586436	upregulated	proteomics	2-DE	ENSG00000188229
spinal cord injury	T9	transection	1d	10116	Wistar	spinal cord;parenchyma	Unknown (protein for MGC:73008)	38014578	GI	16586436	upregulated	proteomics	2-DE	ENSG00000188229
spinal cord injury	T9	transection	1d	10116	Wistar	spinal cord;parenchyma	Unknown (protein for MGC:94596)	55715677	GI	16586436	upregulated	proteomics	2-DE	ENSG00000071127
spinal cord injury	T9	transection	1d	10116	Wistar	spinal cord;parenchyma	Hypothetical protein XP_216453	NP_058704	RefSeq	16586436	upregulated	proteomics	2-DE	ENSG00000111640
spinal cord injury	T9	transection	1d	10116	Wistar	spinal cord;parenchyma	Heart shock 27 kDa protein 1	NM_031970	RefSeq_NT	16586436	downregulated	proteomics	2-DE	ENSG00000106211
spinal cord injury	T9	transection	1d	10116	Wistar	spinal cord;parenchyma	Septin 2	16924010	GI	16586436	downregulated	proteomics	2-DE	ENSG00000168385
spinal cord injury	T9	transection	1d	10116	Wistar	spinal cord;parenchyma	Chaperonin containing TCP1, subunit 3	40018616	GI	16586436	downregulated	proteomics	2-DE	ENSG00000163468
spinal cord injury	T9	transection	1d	10116	Wistar	spinal cord;parenchyma	Similar to CT (chaperonin containing TCP-1) zeta subunit	NP_001028856	RefSeq	16586436	downregulated	proteomics	2-DE	ENSG00000146731
spinal cord injury	T9	transection	1d	10116	Wistar	spinal cord;parenchyma	Similar to translation initiation factor eIF-4A II	55716055	GI	16586436	downregulated	proteomics	2-DE	ENSG00000156976
spinal cord injury	T9	transection	1d	10116	Wistar	spinal cord;parenchyma	Pyruvate dehydrogenase beta	50925725	GI	16586436	downregulated	proteomics	2-DE	ENSG00000168291
spinal cord injury	T9	transection	1d	10116	Wistar	spinal cord;parenchyma	NADH dehydrogenase 1 alpha subcomplex 10-like protein	30171809	GI	16586436	downregulated	proteomics	2-DE	ENSG00000130414
spinal cord injury	T9	transection	1d	10116	Wistar	spinal cord;parenchyma	Phgdh protein	55562727	GI	16586436	downregulated	proteomics	2-DE	ENSG00000092621
spinal cord injury	T9	transection	1d	10116	Wistar	spinal cord;parenchyma	Dynamin 1	18093102	GI	16586436	downregulated	proteomics	2-DE	ENSG00000106976
spinal cord injury	T9	transection	1d	10116	Wistar	spinal cord;parenchyma	Fscn1 protein	P85845	UniProt	16586436	downregulated	proteomics	2-DE	ENSG00000075618
spinal cord injury	T9	transection	1d	10116	Wistar	spinal cord;parenchyma	Reticulocalbin 2	NP_058828	RefSeq	16586436	downregulated	proteomics	2-DE	ENSG00000117906
spinal cord injury	T9	transection	1d	10116	Wistar	spinal cord;parenchyma	Neuronal differentiation-related gene	NP_647549	RefSeq	16586436	downregulated	proteomics	2-DE	ENSG00000110107
spinal cord injury	T9	transection	1d	10116	Wistar	spinal cord;parenchyma	CDCreI-1AI	19909845	GI	16586436	downregulated	proteomics	2-DE	ENSG00000184702
spinal cord injury	T9	transection	1d	10116	Wistar	spinal cord;parenchyma	Guanidinoacetate methyltransferase	NP_036925	RefSeq	16586436	downregulated	proteomics	2-DE	ENSG00000130005
spinal cord injury	T9	transection	1d	10116	Wistar	spinal cord;parenchyma	Adenylyl cyclase-associated protein (CAP) homo-log MCH1	Q08163	UniProt	16586436	downregulated	proteomics	2-DE	ENSG00000131236
spinal cord injury	T9	contusion	1d	10116	Sprague-Dawley	spinal cord;parenchyma	Protein-disulfide isomerase A3 precursor	P11598	UniProt	18482974	upregulated	proteomics	2-DE	ENSG00000167004
spinal cord injury	T9	contusion	1d	10116	Sprague-Dawley	spinal cord;parenchyma	Calreticulin precursor	P18418	UniProt	18482974	upregulated	proteomics	2-DE	ENSG00000179218
spinal cord injury	T9	contusion	1d	10116	Sprague-Dawley	spinal cord;parenchyma	Aldehyde dehydrogenase, mitochondrial	P11884	UniProt	18482974	downregulated	proteomics	2-DE	ENSG00000111275
spinal cord injury	T9	contusion	1d	10116	Sprague-Dawley	spinal cord;parenchyma	Transferrin	P12346	UniProt	18482974	upregulated	proteomics	2-DE	ENSG00000091513
spinal cord injury	T9	contusion	1d	10116	Sprague-Dawley	spinal cord;parenchyma	Rho GDP dissociation inhibitor 1	Q5XI73	UniProt	18482974	upregulated	proteomics	2-DE	ENSG00000141522
spinal cord injury	T9	contusion	1d	10116	Sprague-Dawley	spinal cord;parenchyma	F-box only protein 2	B2RYJ7	UniProt	18482974	upregulated	proteomics	2-DE	ENSG00000115073
spinal cord injury	T9	contusion	1d	10116	Sprague-Dawley	spinal cord;parenchyma	Keratan sulfate proteoglycan lumican	P51886	UniProt	18482974	upregulated	proteomics	2-DE	ENSG00000139329
spinal cord injury	T9	contusion	1d	10116	Sprague-Dawley	spinal cord;parenchyma	G protein beta-2 subunit	P54313	UniProt	18482974	upregulated	proteomics	2-DE	ENSG00000172354
spinal cord injury	T9	contusion	1d	10116	Sprague-Dawley	spinal cord;parenchyma	Tropomyosin beta chain	P58775	UniProt	18482974	upregulated	proteomics	2-DE	ENSG00000198467
spinal cord injury	T9	contusion	1d	10116	Sprague-Dawley	spinal cord;parenchyma	Apolipoprotein E precursor	P02650	UniProt	18482974	upregulated	proteomics	2-DE	ENSG00000130203
spinal cord injury	T9	contusion	1d	10116	Sprague-Dawley	spinal cord;parenchyma	Malate dehydrogenase, cytoplasmic	O88989	UniProt	18482974	downregulated	proteomics	2-DE	ENSG00000014641
spinal cord injury	T9	contusion	1d	10116	Sprague-Dawley	spinal cord;parenchyma	Serum albumin precursor	P02770	UniProt	18482974	upregulated	proteomics	2-DE	ENSG00000163631
spinal cord injury	T9	contusion	1d	10116	Sprague-Dawley	spinal cord;parenchyma	Ubiquitin carboxyl-terminal hydrolase isozyme L1	Q00981	UniProt	18482974	downregulated	proteomics	2-DE	ENSG00000154277
spinal cord injury	T9	contusion	1d	10116	Sprague-Dawley	spinal cord;parenchyma	Peroxiredoxin-2	P35704	UniProt	18482974	downregulated	proteomics	2-DE	ENSG00000167815
spinal cord injury	T9	contusion	1d	10116	Sprague-Dawley	spinal cord;parenchyma	Apolipoprotein A-I precursor	P04639	UniProt	18482974	upregulated	proteomics	2-DE	ENSG00000118137
spinal cord injury	T9	contusion	1d	10116	Sprague-Dawley	spinal cord;parenchyma	Phosphatidylethanolamine-binding protein 1	P31044	UniProt	18482974	upregulated	proteomics	2-DE	ENSG00000089220
spinal cord injury	T9	contusion	1d	10116	Sprague-Dawley	spinal cord;parenchyma	Calmodulin (CaM)	P62161	UniProt	18482974	upregulated	proteomics	2-DE	ENSG00000143933
spinal cord injury	T9	contusion	1d	10116	Sprague-Dawley	spinal cord;parenchyma	Calmodulin (CaM)	P62161	UniProt	18482974	upregulated	proteomics	2-DE	ENSG00000198668
spinal cord injury	T9	contusion	1d	10116	Sprague-Dawley	spinal cord;parenchyma	Calmodulin (CaM)	P62161	UniProt	18482974	upregulated	proteomics	2-DE	ENSG00000160014
spinal cord injury	T9	contusion	1d	10116	Sprague-Dawley	spinal cord;parenchyma	Protein S100-B	P04631	UniProt	18482974	upregulated	proteomics	2-DE	ENSG00000160307
spinal cord injury	T9	contusion	1d	10116	Sprague-Dawley	spinal cord;parenchyma	Transthyretin precursor	P02767	UniProt	18482974	upregulated	proteomics	2-DE	ENSG00000118271
spinal cord injury	T9	contusion	1d	10116	Sprague-Dawley	spinal cord;parenchyma	Triose-phosphate isomerasei	P48500	UniProt	18482974	downregulated	proteomics	2-DE	ENSG00000111669
spinal cord injury	T9	contusion	1d	10116	Sprague-Dawley	spinal cord;parenchyma	Peroxiredoxin-6	O35244	UniProt	18482974	downregulated	proteomics	2-DE	ENSG00000117592
spinal cord injury	T9	contusion	1d	10116	Sprague-Dawley	spinal cord;parenchyma	Y-Synuclein	Q63544	UniProt	18482974	downregulated	proteomics	2-DE	ENSG00000173267
spinal cord injury	T9	contusion	1d	10116	Sprague-Dawley	spinal cord;parenchyma	Galectin-1	P11762	UniProt	18482974	upregulated	proteomics	2-DE	ENSG00000100097
spinal cord injury	T9	contusion	1d	10116	Sprague-Dawley	spinal cord;parenchyma	Neurofilament triplet L protein	P19527	UniProt	18482974	downregulated	proteomics	2-DE	ENSG00000277586
spinal cord injury	T9	contusion	1d	10116	Sprague-Dawley	spinal cord;parenchyma	Glutamine synthetase	P09606	UniProt	18482974	downregulated	proteomics	2-DE	ENSG00000135821
spinal cord injury	T9	contusion	1d	10116	Sprague-Dawley	spinal cord;parenchyma	Glial fibrillary acidic protein, astrocyte	P47819	UniProt	18482974	upregulated	proteomics	2-DE	ENSG00000131095
spinal cord injury	T9	contusion	1d	10116	Sprague-Dawley	spinal cord;parenchyma	Creatine kinase B-type	P07335	UniProt	18482974	downregulated	proteomics	2-DE	ENSG00000166165
spinal cord injury	T9	contusion	1d	10116	Sprague-Dawley	spinal cord;parenchyma	Lactoylglutathione lyase	Q6P7Q4	UniProt	18482974	upregulated	proteomics	2-DE	ENSG00000124767
spinal cord injury	T9	contusion	1d	10116	Sprague-Dawley	spinal cord;parenchyma	Triose-phosphate isomerase	P48500	UniProt	18482974	upregulated	proteomics	2-DE	ENSG00000111669
spinal cord injury	T9	contusion	1d	10116	Sprague-Dawley	spinal cord;parenchyma	Succinyl-CoA ligase	P13086	UniProt	18482974	upregulated	proteomics	2-DE	ENSG00000163541
spinal cord injury	T9	contusion	1d	10116	Sprague-Dawley	spinal cord;parenchyma	a-Internexin	P23565	UniProt	18482974	downregulated	proteomics	2-DE	ENSG00000148798
spinal cord injury	T9	contusion	1d	10116	Sprague-Dawley	spinal cord;parenchyma	Fatty acid-binding protein, brain	P55051	UniProt	18482974	upregulated	proteomics	2-DE	ENSG00000164434
spinal cord injury	T9	contusion	1d	10116	Sprague-Dawley	spinal cord;parenchyma	Isocitrate dehydrogenase	Q99NA5	UniProt	18482974	upregulated	proteomics	2-DE	ENSG00000166411
spinal cord injury	T9	contusion	1d	10116	Sprague-Dawley	spinal cord;parenchyma	Heat shock 27-kDa protein	P42930	UniProt	18482974	upregulated	proteomics	2-DE	ENSG00000106211
spinal cord injury	T9	contusion	1d	10116	Sprague-Dawley	spinal cord;parenchyma	Dihydropyrimidinase-related protein 2	P47942	UniProt	18482974	upregulated	proteomics	2-DE	ENSG00000092964
spinal cord injury	T9	contusion	1d	10116	Sprague-Dawley	spinal cord;parenchyma	Annexin A3	P14669	UniProt	18482974	downregulated	proteomics	2-DE	ENSG00000138772
spinal cord injury	T9	contusion	1d	10116	Sprague-Dawley	spinal cord;parenchyma	Rab GDP dissociation inhibitor	P50398	UniProt	18482974	upregulated	proteomics	2-DE	ENSG00000203879
spinal cord injury	T7	transection	8d	10116	Wistar	spinal cord;parenchyma	Peroxiredoxin 1	16923958	GI	19119913	upregulated	proteomics	2-DE	ENSG00000117450
spinal cord injury	T7	transection	8d	10116	Wistar	spinal cord;parenchyma	Septin 6 (predicted)	157821523	GI	19119913	upregulated	proteomics	2-DE	ENSG00000138758
spinal cord injury	T7	transection	8d	10116	Wistar	spinal cord;parenchyma	Lectin, galactose binding, soluble 3	P08699	UniProt	19119913	upregulated	proteomics	2-DE	ENSG00000131981
spinal cord injury	T7	transection	8d	10116	Wistar	spinal cord;parenchyma	Glutathione S-transferase, pi 1	P04906	UniProt	19119913	upregulated	proteomics	2-DE	ENSG00000084207
spinal cord injury	T7	transection	8d	10116	Wistar	spinal cord;parenchyma	Isocitrate dehydrogenase 3 (NAD), gamma	54020666	GI	19119913	upregulated	proteomics	2-DE	ENSG00000067829
spinal cord injury	T7	transection	8d	10116	Wistar	spinal cord;parenchyma	3-Phosphoglycerate dehydrogenase	13928850	GI	19119913	upregulated	proteomics	2-DE	ENSG00000092621
spinal cord injury	T7	transection	8d	10116	Wistar	spinal cord;parenchyma	Aldehyde dehydrogenase 1 family, member B1	58865518	GI	19119913	upregulated	proteomics	2-DE	ENSG00000137124
spinal cord injury	T7	transection	8d	10116	Wistar	spinal cord;parenchyma	Similar to 3-oxoacid CoA transferase 1	NP_001121052	RefSeq	19119913	upregulated	proteomics	2-DE	ENSG00000083720
spinal cord injury	T7	transection	8d	10116	Wistar	spinal cord;parenchyma	Adenylate cyclase-associated protein 1	59709467	GI	19119913	upregulated	proteomics	2-DE	ENSG00000131236
spinal cord injury	T7	transection	8d	10116	Wistar	spinal cord;parenchyma	4-Aminobutyrate aminotransferase	122065191	GI	19119913	upregulated	proteomics	2-DE	ENSG00000183044
spinal cord injury	T7	transection	8d	10116	Wistar	spinal cord;parenchyma	Isocitrate dehydrogenase 3 (NADê_) alpha	P41562	UniProt	19119913	upregulated	proteomics	2-DE	ENSG00000138413
spinal cord injury	T7	transection	8d	10116	Wistar	spinal cord;parenchyma	Malate dehydrogenase 1, NAD (soluble)	15100179	GI	19119913	upregulated	proteomics	2-DE	ENSG00000014641
spinal cord injury	T7	transection	8d	10116	Wistar	spinal cord;parenchyma	Lactate dehydrogenase B	P42123	UniProt	19119913	upregulated	proteomics	2-DE	ENSG00000111716
spinal cord injury	T7	transection	8d	10116	Wistar	spinal cord;parenchyma	Annexin A3	P14669	UniProt	19119913	upregulated	proteomics	2-DE	ENSG00000138772
spinal cord injury	T7	transection	8d	10116	Wistar	spinal cord;parenchyma	Similar to metallo-beta-lactamase superfamily protein-like (XL884) (predicted)	157821863	GI	19119913	upregulated	proteomics	2-DE	ENSG00000176055
spinal cord injury	T7	transection	8d	10116	Wistar	spinal cord;parenchyma	Heat shock 27-kDa protein 1	NP_114176	RefSeq	19119913	upregulated	proteomics	2-DE	ENSG00000106211
spinal cord injury	T7	transection	8d	10116	Wistar	spinal cord;parenchyma	Fumarate hydratase 1	158186722	GI	19119913	upregulated	proteomics	2-DE	ENSG00000091483
spinal cord injury	T7	transection	8d	10116	Wistar	spinal cord;parenchyma	Glutathione S-transferase, pi 2	NP_036709	RefSeq	19119913	upregulated	proteomics	2-DE	ENSG00000084207
spinal cord injury	T7	transection	8d	10116	Wistar	spinal cord;parenchyma	Phosphatidylethanolamine binding protein 1	8393910	GI	19119913	upregulated	proteomics	2-DE	ENSG00000089220
spinal cord injury	T7	transection	8d	10116	Wistar	spinal cord;parenchyma	Crystallin, alpha B	57580	GI	19119913	upregulated	proteomics	2-DE	ENSG00000134970
spinal cord injury	T7	transection	8d	10116	Wistar	spinal cord;parenchyma	Crystallin, alpha B	57580	GI	19119913	upregulated	proteomics	2-DE	ENSG00000171357
spinal cord injury	T7	transection	8d	10116	Wistar	spinal cord;parenchyma	Crystallin, alpha B	57580	GI	19119913	upregulated	proteomics	2-DE	ENSG00000109846
spinal cord injury	T7	transection	8d	10116	Wistar	spinal cord;parenchyma	Stathmin 1	8393696	GI	19119913	upregulated	proteomics	2-DE	ENSG00000117632
spinal cord injury	T7	transection	8d	10116	Wistar	spinal cord;parenchyma	Creatine kinase, mitochondrial 1, ubiquitous	60678254	GI	19119913	upregulated	proteomics	2-DE	ENSG00000237289
spinal cord injury	T7	transection	8d	10116	Wistar	spinal cord;parenchyma	NADH dehydrogenase (ubiquinone) 1 alpha subcomplex 5	Q63362	UniProt	19119913	upregulated	proteomics	2-DE	ENSG00000128609
spinal cord injury	T7	transection	8d	10116	Wistar	spinal cord;parenchyma	Lamin A	453180	GI	19119913	upregulated	proteomics	2-DE	ENSG00000160789
spinal cord injury	T7	transection	8d	10116	Wistar	spinal cord;parenchyma	Cyclic nucleotide phosphodiesterase 1	149054231	GI	19119913	upregulated	proteomics	2-DE	ENSG00000173786
spinal cord injury	T7	transection	8d	10116	Wistar	spinal cord;parenchyma	Glutamate-ammonia ligase	142349612	GI	19119913	upregulated	proteomics	2-DE	ENSG00000135821
spinal cord injury	T7	transection	8d	10116	Wistar	spinal cord;parenchyma	Fatty acid binding protein 5, epidermal	1836058	GI	19119913	upregulated	proteomics	2-DE	ENSG00000164687
spinal cord injury	T7	transection	8d	10116	Wistar	spinal cord;parenchyma	Phosphoglycerate mutase 1	NP_445742	RefSeq	19119913	upregulated	proteomics	2-DE	ENSG00000171314
spinal cord injury	T7	transection	8d	10116	Wistar	spinal cord;parenchyma	Cytochrome c oxidase, subunit 5A	P11240	UniProt	19119913	upregulated	proteomics	2-DE	ENSG00000178741
spinal cord injury	T7	transection	8d	10116	Wistar	spinal cord;parenchyma	Creatine kinase, brain	NP_036661	RefSeq	19119913	upregulated	proteomics	2-DE	ENSG00000166165
spinal cord injury	T7	transection	8d	10116	Wistar	spinal cord;parenchyma	Pyruvate dehydrogenase (lipoamide) beta	56090293	GI	19119913	upregulated	proteomics	2-DE	ENSG00000168291
spinal cord injury	T7	transection	8d	10116	Wistar	spinal cord;parenchyma	Cysteine and glycine-rich protein 1	8393206	GI	19119913	upregulated	proteomics	2-DE	ENSG00000159176
spinal cord injury	T7	transection	8d	10116	Wistar	spinal cord;parenchyma	Catalase	6978607	GI	19119913	upregulated	proteomics	2-DE	ENSG00000121691
spinal cord injury	T7	transection	8d	10116	Wistar	spinal cord;parenchyma	Stress-induced phosphoprotein 1	20302113	GI	19119913	upregulated	proteomics	2-DE	ENSG00000168439
spinal cord injury	T7	transection	8d	10116	Wistar	spinal cord;parenchyma	Aconitase 2, mitochondrial	40538860	GI	19119913	upregulated	proteomics	2-DE	ENSG00000100412
spinal cord injury	T7	transection	8d	10116	Wistar	spinal cord;parenchyma	Fumarylacetoacetate hydrolase domain containing 2A (predicted)	NP_001128306	RefSeq	19119913	upregulated	proteomics	2-DE	ENSG00000144199
spinal cord injury	T7	transection	8d	10116	Wistar	spinal cord;parenchyma	Triosephosphate isomerase 1	38512111	GI	19119913	upregulated	proteomics	2-DE	ENSG00000111669
spinal cord injury	T7	transection	8d	10116	Wistar	spinal cord;parenchyma	Parkinson disease (autosomal recessive, early onset)	16924002	GI	19119913	upregulated	proteomics	2-DE	ENSG00000116288
spinal cord injury	T7	transection	8d	10116	Wistar	spinal cord;parenchyma	Glutamate dehydrogenase 1	6980956	GI	19119913	upregulated	proteomics	2-DE	ENSG00000182890
spinal cord injury	T7	transection	8d	10116	Wistar	spinal cord;parenchyma	Glutamate dehydrogenase 1	6980956	GI	19119913	upregulated	proteomics	2-DE	ENSG00000148672
spinal cord injury	T10	contusion	1d	10116	Long-Evans	spinal cord;parenchyma	14-3-3 protein delta/zeta	P63102	UniProt	19691422	upregulated	proteomics	2-DE	ENSG00000164924
spinal cord injury	T10	contusion	1d	10116	Long-Evans	spinal cord;parenchyma	Heat-shock protein HSP 90-alpha	P82995	UniProt	19691422	upregulated	proteomics	2-DE	ENSG00000080824
spinal cord injury	T10	contusion	1d	10116	Long-Evans	spinal cord;parenchyma	Transferrin	P12346	UniProt	19691422	upregulated	proteomics	2-DE	ENSG00000091513
spinal cord injury	T10	contusion	1d	10116	Long-Evans	spinal cord;parenchyma	Heat-shock cognate 71 kDa protein	P63018	UniProt	19691422	upregulated	proteomics	2-DE	ENSG00000109971
spinal cord injury	T10	contusion	1d	10116	Long-Evans	spinal cord;parenchyma	Heat-shock 70 kDa protein 1L	P55063	UniProt	19691422	upregulated	proteomics	2-DE	ENSG00000204390
spinal cord injury	T10	contusion	1d	10116	Long-Evans	spinal cord;parenchyma	Serum albumin precursor	P02770	UniProt	19691422	upregulated	proteomics	2-DE	ENSG00000163631
spinal cord injury	T10	contusion	1d	10116	Long-Evans	spinal cord;parenchyma	Heat shock-related 70 kDa protein 2	P14659	UniProt	19691422	upregulated	proteomics	2-DE	ENSG00000126803
spinal cord injury	T10	contusion	1d	10116	Long-Evans	spinal cord;parenchyma	Neurofilament light chain	P19527	UniProt	19691422	upregulated	proteomics	2-DE	ENSG00000277586
spinal cord injury	T10	contusion	1d	10116	Long-Evans	spinal cord;parenchyma	Fetuin A	P24090	UniProt	19691422	upregulated	proteomics	2-DE	ENSG00000145192
spinal cord injury	T10	contusion	1d	10116	Long-Evans	spinal cord;parenchyma	Probable coiled-coil domain-containing protein 8	P62521	UniProt	19691422	upregulated	proteomics	2-DE	ENSG00000169515
spinal cord injury	T10	contusion	1d	10116	Long-Evans	spinal cord;parenchyma	Triosephosphate isomerase 1	P48500	UniProt	19691422	upregulated	proteomics	2-DE	ENSG00000111669
spinal cord injury	T10	contusion	1d	10116	Long-Evans	spinal cord;parenchyma	Glutathione S-transferase Yb-3	P08009	UniProt	19691422	upregulated	proteomics	2-DE	ENSG00000213366
spinal cord injury	T10	contusion	1d	10116	Long-Evans	spinal cord;parenchyma	Apolipoprotein A-I precursor	P04639	UniProt	19691422	upregulated	proteomics	2-DE	ENSG00000118137
spinal cord injury	T10	contusion	1d	10116	Long-Evans	spinal cord;parenchyma	Peroxiredoxin-6	O35244	UniProt	19691422	upregulated	proteomics	2-DE	ENSG00000117592
spinal cord injury	T10	contusion	1d	10116	Long-Evans	spinal cord;parenchyma	Albumin	P02770	UniProt	19691422	upregulated	proteomics	2-DE	ENSG00000163631
spinal cord injury	T10	contusion	1d	10116	Long-Evans	spinal cord;parenchyma	Trioephosphate isomerase	P48500	UniProt	19691422	upregulated	proteomics	2-DE	ENSG00000111669
spinal cord injury	T10	contusion	1d	10116	Long-Evans	spinal cord;parenchyma	Alpha crystalline B-chain	P23928	UniProt	19691422	upregulated	proteomics	2-DE	ENSG00000109846
spinal cord injury	T10	contusion	1d	10116	Long-Evans	spinal cord;parenchyma	Dihydropyrimidinase-related protein 2	P47942	UniProt	19691422	downregulated	proteomics	2-DE	ENSG00000092964
spinal cord injury	T10	contusion	1d	10116	Long-Evans	spinal cord;parenchyma	Glial fibrillary acidic protein	P47819	UniProt	19691422	downregulated	proteomics	2-DE	ENSG00000131095
spinal cord injury	T10	contusion	1d	10116	Long-Evans	spinal cord;parenchyma	Creatine kinase B-type	P07335	UniProt	19691422	downregulated	proteomics	2-DE	ENSG00000166165
spinal cord injury	T10	contusion	1d	10116	Long-Evans	spinal cord;parenchyma	Alpha-enolase	P04764	UniProt	19691422	downregulated	proteomics	2-DE	ENSG00000074800
spinal cord injury	T10	contusion	1d	10116	Long-Evans	spinal cord;parenchyma	Gamma-enolase	P07323	UniProt	19691422	downregulated	proteomics	2-DE	ENSG00000111674
spinal cord injury	T10	contusion	1d	10116	Long-Evans	spinal cord;parenchyma	Neurofilamint light chain	P19527	UniProt	19691422	phosphorylated-up	proteomics	2-DE	ENSG00000277586
spinal cord injury	T10	contusion	1d	10116	Long-Evans	spinal cord;parenchyma	Fetuin-A	P24090	UniProt	19691422	phosphorylated-up	proteomics	2-DE	ENSG00000145192
spinal cord injury	T10	contusion	1d	10116	Long-Evans	spinal cord;parenchyma	Probable coiled-coil domain-containing protein 8	P62521	UniProt	19691422	phosphorylated-up	proteomics	2-DE	ENSG00000169515
spinal cord injury	T10	contusion	1d	10116	Long-Evans	spinal cord;parenchyma	14-3-3 protein alpha/beta	P35213	UniProt	19691422	phosphorylated-up	proteomics	2-DE	ENSG00000166913
spinal cord injury	T10	contusion	1d	10116	Long-Evans	spinal cord;parenchyma	14-3-3 protein delta/zeta	P63102	UniProt	19691422	phosphorylated-up	proteomics	2-DE	ENSG00000164924
spinal cord injury	T10	contusion	1d	10116	Long-Evans	spinal cord;parenchyma	Glyceraldehyde-3-phosphate dehydrogenase	P04797	UniProt	19691422	phosphorylated-up	proteomics	2-DE	ENSG00000111640
spinal cord injury	T10	contusion	1d	10116	Long-Evans	spinal cord;parenchyma	Ubiquitin carboxyl-terminal hydrolase isozyme L1	Q00981	UniProt	19691422	phosphorylated-up	proteomics	2-DE	ENSG00000154277
spinal cord injury	T10	contusion	1d	10116	Long-Evans	spinal cord;parenchyma	Cathepsin D precursor	P24268	UniProt	19691422	phosphorylated-down	proteomics	2-DE	ENSG00000117984
spinal cord injury	T10	contusion	1d	10116	Long-Evans	spinal cord;parenchyma	Neurofilament light chain	P19527	UniProt	19691422	phosphorylated-down	proteomics	2-DE	ENSG00000277586
spinal cord injury	T11	contusion	8hr	10116	Sprague-Dawley	spinal cord;parenchyma	14-3-3 protein epsilon	P62260	UniProt	20141154	upregulated	proteomics	2-DE	ENSG00000108953
spinal cord injury	T11	contusion	8hr	10116	Sprague-Dawley	spinal cord;parenchyma	Dynein light chain 1, cytoplasmic	P63170	UniProt	20141154	upregulated	proteomics	2-DE	ENSG00000088986
spinal cord injury	T11	contusion	8hr	10116	Sprague-Dawley	spinal cord;parenchyma	Tubulin beta-5 chain	P69897	UniProt	20141154	upregulated	proteomics	2-DE	ENSG00000196230
spinal cord injury	T11	contusion	8hr	10116	Sprague-Dawley	spinal cord;parenchyma	Adenylyl cyclase-associated protein 1 (Cap 1)	Q08163	UniProt	20141154	downregulated	proteomics	2-DE	ENSG00000131236
spinal cord injury	T11	contusion	8hr	10116	Sprague-Dawley	spinal cord;parenchyma	Dihydropyrimidinase-related protein 2	P47942	UniProt	20141154	downregulated	proteomics	2-DE	ENSG00000092964
spinal cord injury	T11	contusion	8hr	10116	Sprague-Dawley	spinal cord;parenchyma	F--actin-capping protein subunit beta	Q5XI32	UniProt	20141154	downregulated	proteomics	2-DE	ENSG00000077549
spinal cord injury	T11	contusion	8hr	10116	Sprague-Dawley	spinal cord;parenchyma	Glyceraldehyde-3-phosphate dehydrogenase	P04797	UniProt	20141154	downregulated	proteomics	2-DE	ENSG00000111640
spinal cord injury	T11	contusion	8hr	10116	Sprague-Dawley	spinal cord;parenchyma	Stress-induced phosphoprotein 1	O35814	UniProt	20141154	downregulated	proteomics	2-DE	ENSG00000168439
spinal cord injury	T11	contusion	8hr	10116	Sprague-Dawley	spinal cord;parenchyma	Transthyretin	P02767	UniProt	20141154	downregulated	proteomics	2-DE	ENSG00000118271
spinal cord injury	T10	contusion	8hr	10116	Wistar	spinal cord;parenchyma	Fibrinogen, B beta polypeptide	32527707	GI	20399821	upregulated	proteomics	2-DE	ENSG00000171564
spinal cord injury	T10	contusion	1d	10116	Wistar	spinal cord;parenchyma	Fibrinogen, B beta polypeptide	32527707	GI	20399821	upregulated	proteomics	2-DE	ENSG00000171564
spinal cord injury	T10	contusion	3d	10116	Wistar	spinal cord;parenchyma	Fibrinogen, B beta polypeptide	32527707	GI	20399821	upregulated	proteomics	2-DE	ENSG00000171564
spinal cord injury	T10	contusion	5d	10116	Wistar	spinal cord;parenchyma	Fibrinogen, B beta polypeptide	32527707	GI	20399821	upregulated	proteomics	2-DE	ENSG00000171564
spinal cord injury	T10	contusion	1d	10116	Wistar	spinal cord;parenchyma	Phosphoglycerate mutase 1	NP_445742	RefSeq	20399821	upregulated	proteomics	2-DE	ENSG00000171314
spinal cord injury	T10	contusion	3d	10116	Wistar	spinal cord;parenchyma	Phosphoglycerate mutase 1	NP_445742	RefSeq	20399821	upregulated	proteomics	2-DE	ENSG00000171314
spinal cord injury	T10	contusion	5d	10116	Wistar	spinal cord;parenchyma	Phosphoglycerate mutase 1	NP_445742	RefSeq	20399821	upregulated	proteomics	2-DE	ENSG00000171314
spinal cord injury	T10	contusion	1d	10116	Wistar	spinal cord;parenchyma	Ferritin light chain 1	84000579	GI	20399821	upregulated	proteomics	2-DE	ENSG00000087086
spinal cord injury	T10	contusion	3d	10116	Wistar	spinal cord;parenchyma	Ferritin light chain 1	84000579	GI	20399821	upregulated	proteomics	2-DE	ENSG00000087086
spinal cord injury	T10	contusion	5d	10116	Wistar	spinal cord;parenchyma	Ferritin light chain 1	84000579	GI	20399821	upregulated	proteomics	2-DE	ENSG00000087086
spinal cord injury	T10	contusion	8hr	10116	Wistar	spinal cord;parenchyma	Hemopexin	16758014	GI	20399821	upregulated	proteomics	2-DE	ENSG00000110169
spinal cord injury	T10	contusion	1d	10116	Wistar	spinal cord;parenchyma	Hemopexin	16758014	GI	20399821	upregulated	proteomics	2-DE	ENSG00000110169
spinal cord injury	T10	contusion	3d	10116	Wistar	spinal cord;parenchyma	Hemopexin	16758014	GI	20399821	upregulated	proteomics	2-DE	ENSG00000110169
spinal cord injury	T10	contusion	5d	10116	Wistar	spinal cord;parenchyma	Hemopexin	16758014	GI	20399821	upregulated	proteomics	2-DE	ENSG00000110169
spinal cord injury	T10	contusion	8hr	10116	Wistar	spinal cord;parenchyma	Apolipoprotein A-I	P04639	UniProt	20399821	upregulated	proteomics	2-DE	ENSG00000118137
spinal cord injury	T10	contusion	1d	10116	Wistar	spinal cord;parenchyma	Apolipoprotein A-I	P04639	UniProt	20399821	upregulated	proteomics	2-DE	ENSG00000118137
spinal cord injury	T10	contusion	3d	10116	Wistar	spinal cord;parenchyma	Apolipoprotein A-I	P04639	UniProt	20399821	upregulated	proteomics	2-DE	ENSG00000118137
spinal cord injury	T10	contusion	5d	10116	Wistar	spinal cord;parenchyma	Apolipoprotein A-I	P04639	UniProt	20399821	upregulated	proteomics	2-DE	ENSG00000118137
spinal cord injury	T10	contusion	1d	10116	Wistar	spinal cord;parenchyma	Ferritin, heavy polypeptide 1	6978859	GI	20399821	upregulated	proteomics	2-DE	ENSG00000167996
spinal cord injury	T10	contusion	3d	10116	Wistar	spinal cord;parenchyma	Ferritin, heavy polypeptide 1	6978859	GI	20399821	upregulated	proteomics	2-DE	ENSG00000167996
spinal cord injury	T10	contusion	5d	10116	Wistar	spinal cord;parenchyma	Ferritin, heavy polypeptide 1	6978859	GI	20399821	upregulated	proteomics	2-DE	ENSG00000167996
spinal cord injury	T10	contusion	1d	10116	Wistar	spinal cord;parenchyma	Crystallin, alpha B	57580	GI	20399821	upregulated	proteomics	2-DE	ENSG00000134970
spinal cord injury	T10	contusion	1d	10116	Wistar	spinal cord;parenchyma	Crystallin, alpha B	57580	GI	20399821	upregulated	proteomics	2-DE	ENSG00000171357
spinal cord injury	T10	contusion	1d	10116	Wistar	spinal cord;parenchyma	Crystallin, alpha B	57580	GI	20399821	upregulated	proteomics	2-DE	ENSG00000109846
spinal cord injury	T10	contusion	3d	10116	Wistar	spinal cord;parenchyma	Crystallin, alpha B	57580	GI	20399821	upregulated	proteomics	2-DE	ENSG00000134970
spinal cord injury	T10	contusion	3d	10116	Wistar	spinal cord;parenchyma	Crystallin, alpha B	57580	GI	20399821	upregulated	proteomics	2-DE	ENSG00000171357
spinal cord injury	T10	contusion	3d	10116	Wistar	spinal cord;parenchyma	Crystallin, alpha B	57580	GI	20399821	upregulated	proteomics	2-DE	ENSG00000109846
spinal cord injury	T10	contusion	5d	10116	Wistar	spinal cord;parenchyma	Crystallin, alpha B	57580	GI	20399821	upregulated	proteomics	2-DE	ENSG00000134970
spinal cord injury	T10	contusion	5d	10116	Wistar	spinal cord;parenchyma	Crystallin, alpha B	57580	GI	20399821	upregulated	proteomics	2-DE	ENSG00000171357
spinal cord injury	T10	contusion	5d	10116	Wistar	spinal cord;parenchyma	Crystallin, alpha B	57580	GI	20399821	upregulated	proteomics	2-DE	ENSG00000109846
spinal cord injury	T10	contusion	1d	10116	Wistar	spinal cord;parenchyma	Tyrosine 3-monooxygenase/tryptophan 5-monooxygenase activation protein, epsilon polypeptide	13928824	GI	20399821	upregulated	proteomics	2-DE	ENSG00000108953
spinal cord injury	T10	contusion	3d	10116	Wistar	spinal cord;parenchyma	Tyrosine 3-monooxygenase/tryptophan 5-monooxygenase activation protein, epsilon polypeptide	13928824	GI	20399821	upregulated	proteomics	2-DE	ENSG00000108953
spinal cord injury	T10	contusion	5d	10116	Wistar	spinal cord;parenchyma	Tyrosine 3-monooxygenase/tryptophan 5-monooxygenase activation protein, epsilon polypeptide	13928824	GI	20399821	upregulated	proteomics	2-DE	ENSG00000108953
spinal cord injury	T10	contusion	8hr	10116	Wistar	spinal cord;parenchyma	3-Hydroxy-3methylglutaryl-Coenzyme A synthase 1	8393538	GI	20399821	downregulated	proteomics	2-DE	ENSG00000112972
spinal cord injury	T10	contusion	1d	10116	Wistar	spinal cord;parenchyma	3-Hydroxy-3methylglutaryl-Coenzyme A synthase 1	8393538	GI	20399821	downregulated	proteomics	2-DE	ENSG00000112972
spinal cord injury	T10	contusion	3d	10116	Wistar	spinal cord;parenchyma	3-Hydroxy-3methylglutaryl-Coenzyme A synthase 1	8393538	GI	20399821	downregulated	proteomics	2-DE	ENSG00000112972
spinal cord injury	T10	contusion	5d	10116	Wistar	spinal cord;parenchyma	3-Hydroxy-3methylglutaryl-Coenzyme A synthase 1	8393538	GI	20399821	downregulated	proteomics	2-DE	ENSG00000112972
spinal cord injury	T10	contusion	1d	10116	Wistar	spinal cord;parenchyma	NADH dehydrogenase (ubiquinone) flavoprotein 1	55741424	GI	20399821	upregulated	proteomics	2-DE	ENSG00000167792
spinal cord injury	T10	contusion	3d	10116	Wistar	spinal cord;parenchyma	NADH dehydrogenase (ubiquinone) flavoprotein 1	55741424	GI	20399821	upregulated	proteomics	2-DE	ENSG00000167792
spinal cord injury	T10	contusion	5d	10116	Wistar	spinal cord;parenchyma	NADH dehydrogenase (ubiquinone) flavoprotein 1	55741424	GI	20399821	upregulated	proteomics	2-DE	ENSG00000167792
spinal cord injury	T10	contusion	1d	10116	Wistar	spinal cord;parenchyma	Dihydropyrimidinase-like 2	NP_001099187	RefSeq	20399821	upregulated	proteomics	2-DE	ENSG00000092964
spinal cord injury	T10	contusion	3d	10116	Wistar	spinal cord;parenchyma	Dihydropyrimidinase-like 2	NP_001099187	RefSeq	20399821	upregulated	proteomics	2-DE	ENSG00000092964
spinal cord injury	T10	contusion	5d	10116	Wistar	spinal cord;parenchyma	Dihydropyrimidinase-like 2	NP_001099187	RefSeq	20399821	upregulated	proteomics	2-DE	ENSG00000092964
spinal cord injury	T10	contusion	1d	10116	Wistar	spinal cord;parenchyma	Lectin, galactose binding, soluble 3	1170759	GI	20399821	upregulated	proteomics	2-DE	ENSG00000131981
spinal cord injury	T10	contusion	3d	10116	Wistar	spinal cord;parenchyma	Lectin, galactose binding, soluble 3	1170759	GI	20399821	upregulated	proteomics	2-DE	ENSG00000131981
spinal cord injury	T10	contusion	5d	10116	Wistar	spinal cord;parenchyma	Lectin, galactose binding, soluble 3	1170759	GI	20399821	upregulated	proteomics	2-DE	ENSG00000131981
spinal cord injury	T10	contusion	1d	10116	Wistar	spinal cord;parenchyma	Heat shock 27 kDa protein 1	NP_114176	RefSeq	20399821	upregulated	proteomics	2-DE	ENSG00000106211
spinal cord injury	T10	contusion	3d	10116	Wistar	spinal cord;parenchyma	Heat shock 27 kDa protein 1	NP_114176	RefSeq	20399821	upregulated	proteomics	2-DE	ENSG00000106211
spinal cord injury	T10	contusion	5d	10116	Wistar	spinal cord;parenchyma	Heat shock 27 kDa protein 1	NP_114176	RefSeq	20399821	upregulated	proteomics	2-DE	ENSG00000106211
spinal cord injury	T10	contusion	8hr	10116	Wistar	spinal cord;parenchyma	Cofilin 1, non-muscle	P45592	UniProt	20399821	downregulated	proteomics	2-DE	ENSG00000172757
spinal cord injury	T10	contusion	1d	10116	Wistar	spinal cord;parenchyma	Cofilin 1, non-muscle	P45592	UniProt	20399821	downregulated	proteomics	2-DE	ENSG00000172757
spinal cord injury	T10	contusion	3d	10116	Wistar	spinal cord;parenchyma	Cofilin 1, non-muscle	P45592	UniProt	20399821	downregulated	proteomics	2-DE	ENSG00000172757
spinal cord injury	T10	contusion	5d	10116	Wistar	spinal cord;parenchyma	Cofilin 1, non-muscle	P45592	UniProt	20399821	downregulated	proteomics	2-DE	ENSG00000172757
spinal cord injury	T10	contusion	1d	10116	Wistar	spinal cord;parenchyma	Chloride intracellular channel 1	50657380	GI	20399821	upregulated	proteomics	2-DE	ENSG00000213719
spinal cord injury	T10	contusion	3d	10116	Wistar	spinal cord;parenchyma	Chloride intracellular channel 1	50657380	GI	20399821	upregulated	proteomics	2-DE	ENSG00000213719
spinal cord injury	T10	contusion	5d	10116	Wistar	spinal cord;parenchyma	Chloride intracellular channel 1	50657380	GI	20399821	upregulated	proteomics	2-DE	ENSG00000213719
spinal cord injury	T10	contusion	8hr	10116	Wistar	spinal cord;parenchyma	Fibrinogen, alpha polypeptide	P06399	UniProt	20399821	upregulated	proteomics	2-DE	ENSG00000171560
spinal cord injury	T10	contusion	1d	10116	Wistar	spinal cord;parenchyma	Fibrinogen, alpha polypeptide	P06399	UniProt	20399821	upregulated	proteomics	2-DE	ENSG00000171560
spinal cord injury	T10	contusion	3d	10116	Wistar	spinal cord;parenchyma	Fibrinogen, alpha polypeptide	P06399	UniProt	20399821	upregulated	proteomics	2-DE	ENSG00000171560
spinal cord injury	T10	contusion	5d	10116	Wistar	spinal cord;parenchyma	Fibrinogen, alpha polypeptide	P06399	UniProt	20399821	upregulated	proteomics	2-DE	ENSG00000171560
spinal cord injury	T10	contusion	8hr	10116	Wistar	spinal cord;parenchyma	Guanine deaminase	148747414	GI	20399821	upregulated	proteomics	2-DE	ENSG00000119125
spinal cord injury	T10	contusion	1d	10116	Wistar	spinal cord;parenchyma	Guanine deaminase	148747414	GI	20399821	upregulated	proteomics	2-DE	ENSG00000119125
spinal cord injury	T10	contusion	3d	10116	Wistar	spinal cord;parenchyma	Guanine deaminase	148747414	GI	20399821	upregulated	proteomics	2-DE	ENSG00000119125
spinal cord injury	T10	contusion	5d	10116	Wistar	spinal cord;parenchyma	Guanine deaminase	148747414	GI	20399821	upregulated	proteomics	2-DE	ENSG00000119125
spinal cord injury	T10	contusion	1d	10116	Wistar	spinal cord;parenchyma	Annexin A3	122065130	GI	20399821	upregulated	proteomics	2-DE	ENSG00000138772
spinal cord injury	T10	contusion	3d	10116	Wistar	spinal cord;parenchyma	Annexin A3	122065130	GI	20399821	upregulated	proteomics	2-DE	ENSG00000138772
spinal cord injury	T10	contusion	5d	10116	Wistar	spinal cord;parenchyma	Annexin A3	122065130	GI	20399821	upregulated	proteomics	2-DE	ENSG00000138772
spinal cord injury	T10	contusion	1d	10116	Wistar	spinal cord;parenchyma	Moesin	13540689	GI	20399821	upregulated	proteomics	2-DE	ENSG00000147065
spinal cord injury	T10	contusion	3d	10116	Wistar	spinal cord;parenchyma	Moesin	13540689	GI	20399821	upregulated	proteomics	2-DE	ENSG00000147065
spinal cord injury	T10	contusion	5d	10116	Wistar	spinal cord;parenchyma	Moesin	13540689	GI	20399821	upregulated	proteomics	2-DE	ENSG00000147065
spinal cord injury	T10	contusion	1d	10116	Wistar	spinal cord;parenchyma	Proteasome (prosome, macropain) subunit, beta type 8 (large multifunctional peptidase 7)	P28064	UniProt	20399821	upregulated	proteomics	2-DE	ENSG00000204264
spinal cord injury	T10	contusion	3d	10116	Wistar	spinal cord;parenchyma	Proteasome (prosome, macropain) subunit, beta type 8 (large multifunctional peptidase 7)	P28064	UniProt	20399821	upregulated	proteomics	2-DE	ENSG00000204264
spinal cord injury	T10	contusion	5d	10116	Wistar	spinal cord;parenchyma	Proteasome (prosome, macropain) subunit, beta type 8 (large multifunctional peptidase 7)	P28064	UniProt	20399821	upregulated	proteomics	2-DE	ENSG00000204264
spinal cord injury	T10	contusion	1d	10116	Wistar	spinal cord;parenchyma	Pyruvate kinase, muscle	16757994	GI	20399821	upregulated	proteomics	2-DE	ENSG00000067225
spinal cord injury	T10	contusion	3d	10116	Wistar	spinal cord;parenchyma	Pyruvate kinase, muscle	16757994	GI	20399821	upregulated	proteomics	2-DE	ENSG00000067225
spinal cord injury	T10	contusion	5d	10116	Wistar	spinal cord;parenchyma	Pyruvate kinase, muscle	16757994	GI	20399821	upregulated	proteomics	2-DE	ENSG00000067225
spinal cord injury	T10	contusion	8hr	10116	Wistar	spinal cord;parenchyma	Serine/treonine kinase receptor associated protein	58865512	GI	20399821	upregulated	proteomics	2-DE	ENSG00000023734
spinal cord injury	T10	contusion	1d	10116	Wistar	spinal cord;parenchyma	Serine/treonine kinase receptor associated protein	58865512	GI	20399821	upregulated	proteomics	2-DE	ENSG00000023734
spinal cord injury	T10	contusion	3d	10116	Wistar	spinal cord;parenchyma	Serine/treonine kinase receptor associated protein	58865512	GI	20399821	upregulated	proteomics	2-DE	ENSG00000023734
spinal cord injury	T10	contusion	5d	10116	Wistar	spinal cord;parenchyma	Serine/treonine kinase receptor associated protein	58865512	GI	20399821	upregulated	proteomics	2-DE	ENSG00000023734
spinal cord injury	T10	contusion	8hr	10116	Wistar	spinal cord;parenchyma	Protein disulfide isomerase associated 3	8393322	GI	20399821	downregulated	proteomics	2-DE	ENSG00000167004
spinal cord injury	T10	contusion	1d	10116	Wistar	spinal cord;parenchyma	Protein disulfide isomerase associated 3	8393322	GI	20399821	downregulated	proteomics	2-DE	ENSG00000167004
spinal cord injury	T10	contusion	8hr	10116	Wistar	spinal cord;parenchyma	Aldolase A	6978431	GI	20399821	upregulated	proteomics	2-DE	ENSG00000115361
spinal cord injury	T10	contusion	1d	10116	Wistar	spinal cord;parenchyma	Aldolase A	6978431	GI	20399821	upregulated	proteomics	2-DE	ENSG00000115361
spinal cord injury	T10	contusion	3d	10116	Wistar	spinal cord;parenchyma	Aldolase A	6978431	GI	20399821	upregulated	proteomics	2-DE	ENSG00000115361
spinal cord injury	T10	contusion	5d	10116	Wistar	spinal cord;parenchyma	Aldolase A	6978431	GI	20399821	upregulated	proteomics	2-DE	ENSG00000115361
spinal cord injury	T10	contusion	1d	10116	Wistar	spinal cord;parenchyma	Voltage-dependent anion channel 2	13786202	GI	20399821	upregulated	proteomics	2-DE	ENSG00000165637
spinal cord injury	T10	contusion	3d	10116	Wistar	spinal cord;parenchyma	Voltage-dependent anion channel 2	13786202	GI	20399821	upregulated	proteomics	2-DE	ENSG00000165637
spinal cord injury	T10	contusion	5d	10116	Wistar	spinal cord;parenchyma	Voltage-dependent anion channel 2	13786202	GI	20399821	upregulated	proteomics	2-DE	ENSG00000165637
spinal cord injury	T10	contusion	1d	10116	Wistar	spinal cord;parenchyma	Acetyl-Coenzyme A dehydrogenase, long-chain	6978487	GI	20399821	upregulated	proteomics	2-DE	ENSG00000149925
spinal cord injury	T10	contusion	3d	10116	Wistar	spinal cord;parenchyma	Acetyl-Coenzyme A dehydrogenase, long-chain	6978487	GI	20399821	upregulated	proteomics	2-DE	ENSG00000149925
spinal cord injury	T10	contusion	5d	10116	Wistar	spinal cord;parenchyma	Acetyl-Coenzyme A dehydrogenase, long-chain	6978487	GI	20399821	upregulated	proteomics	2-DE	ENSG00000149925
spinal cord injury	T10	contusion	1d	10116	Wistar	spinal cord;parenchyma	L-Arginine:glycine amidinotransferase	13591949	GI	20399821	upregulated	proteomics	2-DE	ENSG00000171766
spinal cord injury	T10	contusion	3d	10116	Wistar	spinal cord;parenchyma	L-Arginine:glycine amidinotransferase	13591949	GI	20399821	upregulated	proteomics	2-DE	ENSG00000171766
spinal cord injury	T10	contusion	5d	10116	Wistar	spinal cord;parenchyma	L-Arginine:glycine amidinotransferase	13591949	GI	20399821	upregulated	proteomics	2-DE	ENSG00000171766
spinal cord injury	T10	contusion	8hr	10116	Wistar	spinal cord;parenchyma	Pyrophosphatase	Q924C3	UniProt	20399821	downregulated	proteomics	2-DE	ENSG00000197594
spinal cord injury	T10	contusion	1d	10116	Wistar	spinal cord;parenchyma	Pyrophosphatase	Q924C3	UniProt	20399821	downregulated	proteomics	2-DE	ENSG00000197594
spinal cord injury	T10	contusion	3d	10116	Wistar	spinal cord;parenchyma	Pyrophosphatase	Q924C3	UniProt	20399821	downregulated	proteomics	2-DE	ENSG00000197594
spinal cord injury	T10	contusion	5d	10116	Wistar	spinal cord;parenchyma	Pyrophosphatase	Q924C3	UniProt	20399821	downregulated	proteomics	2-DE	ENSG00000197594
spinal cord injury	T10	contusion	8hr	10116	Wistar	spinal cord;parenchyma	Thioredoxin-like 1	18266686	GI	20399821	downregulated	proteomics	2-DE	ENSG00000091164
spinal cord injury	T10	contusion	1d	10116	Wistar	spinal cord;parenchyma	Thioredoxin-like 1	18266686	GI	20399821	downregulated	proteomics	2-DE	ENSG00000091164
spinal cord injury	T10	contusion	3d	10116	Wistar	spinal cord;parenchyma	Thioredoxin-like 1	18266686	GI	20399821	downregulated	proteomics	2-DE	ENSG00000091164
spinal cord injury	T10	contusion	5d	10116	Wistar	spinal cord;parenchyma	Thioredoxin-like 1	18266686	GI	20399821	downregulated	proteomics	2-DE	ENSG00000091164
spinal cord injury	T10	contusion	1d	10116	Wistar	spinal cord;parenchyma	Aldehyde dehydrogenase family 6, subfamily A1	145651820	GI	20399821	upregulated	proteomics	2-DE	ENSG00000119711
spinal cord injury	T10	contusion	3d	10116	Wistar	spinal cord;parenchyma	Aldehyde dehydrogenase family 6, subfamily A1	145651820	GI	20399821	upregulated	proteomics	2-DE	ENSG00000119711
spinal cord injury	T10	contusion	5d	10116	Wistar	spinal cord;parenchyma	Aldehyde dehydrogenase family 6, subfamily A1	145651820	GI	20399821	upregulated	proteomics	2-DE	ENSG00000119711
spinal cord injury	T10	contusion	1d	10116	Wistar	spinal cord;parenchyma	Isocitrate dehydrogenase 3 (NAD+) beta	55926203	GI	20399821	upregulated	proteomics	2-DE	ENSG00000101365
spinal cord injury	T10	contusion	3d	10116	Wistar	spinal cord;parenchyma	Isocitrate dehydrogenase 3 (NAD+) beta	55926203	GI	20399821	upregulated	proteomics	2-DE	ENSG00000101365
spinal cord injury	T10	contusion	5d	10116	Wistar	spinal cord;parenchyma	Isocitrate dehydrogenase 3 (NAD+) beta	55926203	GI	20399821	upregulated	proteomics	2-DE	ENSG00000101365
spinal cord injury	T10	contusion	1d	10116	Wistar	spinal cord;parenchyma	Septin 7	NP_072138	RefSeq	20399821	upregulated	proteomics	2-DE	ENSG00000122545
spinal cord injury	T10	contusion	3d	10116	Wistar	spinal cord;parenchyma	Septin 7	NP_072138	RefSeq	20399821	upregulated	proteomics	2-DE	ENSG00000122545
spinal cord injury	T10	contusion	5d	10116	Wistar	spinal cord;parenchyma	Septin 7	NP_072138	RefSeq	20399821	upregulated	proteomics	2-DE	ENSG00000122545
spinal cord injury	T10	contusion	8hr	10116	Wistar	spinal cord;parenchyma	Heterogenous nuclear ribonucleoprotein A2/B1	157265559	GI	20399821	downregulated	proteomics	2-DE	ENSG00000122566
spinal cord injury	T10	contusion	1d	10116	Wistar	spinal cord;parenchyma	Heterogenous nuclear ribonucleoprotein A2/B1	157265559	GI	20399821	downregulated	proteomics	2-DE	ENSG00000122566
spinal cord injury	T10	contusion	8hr	10116	Wistar	spinal cord;parenchyma	Nucleoside phosphorylase	P85973	UniProt	20399821	downregulated	proteomics	2-DE	ENSG00000198805
spinal cord injury	T10	contusion	1d	10116	Wistar	spinal cord;parenchyma	Nucleoside phosphorylase	P85973	UniProt	20399821	downregulated	proteomics	2-DE	ENSG00000198805
spinal cord injury	T10	contusion	1d	10116	Wistar	spinal cord;parenchyma	Lactate dehydrogenase A	8393706	GI	20399821	upregulated	proteomics	2-DE	ENSG00000134333
spinal cord injury	T10	contusion	3d	10116	Wistar	spinal cord;parenchyma	Lactate dehydrogenase A	8393706	GI	20399821	upregulated	proteomics	2-DE	ENSG00000134333
spinal cord injury	T10	contusion	5d	10116	Wistar	spinal cord;parenchyma	Lactate dehydrogenase A	8393706	GI	20399821	upregulated	proteomics	2-DE	ENSG00000134333
spinal cord injury	T10	contusion	8hr	10116	Wistar	spinal cord;parenchyma	NADH dehydrogenase (ubiquinone) flavoprotein 2	51092268	GI	20399821	downregulated	proteomics	2-DE	ENSG00000178127
spinal cord injury	T10	contusion	1d	10116	Wistar	spinal cord;parenchyma	NADH dehydrogenase (ubiquinone) flavoprotein 2	51092268	GI	20399821	downregulated	proteomics	2-DE	ENSG00000178127
spinal cord injury	T10	contusion	3d	10116	Wistar	spinal cord;parenchyma	NADH dehydrogenase (ubiquinone) flavoprotein 2	51092268	GI	20399821	downregulated	proteomics	2-DE	ENSG00000178127
spinal cord injury	T10	contusion	5d	10116	Wistar	spinal cord;parenchyma	NADH dehydrogenase (ubiquinone) flavoprotein 2	51092268	GI	20399821	downregulated	proteomics	2-DE	ENSG00000178127
spinal cord injury	C4	contusion	1d	10116	Sprague-Dawley	spinal cord;CSF	Immunoglobulin heavy chain 1a	P06761	UniProt	21559420	upregulated	proteomics	LC-MS/MS	ENSG00000044574
spinal cord injury	C4	contusion	1d	10116	Sprague-Dawley	spinal cord;CSF	14-3-3 protein zeta/delta	P63102	UniProt	21559420	upregulated	proteomics	LC-MS/MS	ENSG00000164924
spinal cord injury	C4	contusion	1d	10116	Sprague-Dawley	spinal cord;CSF	similar to NGF-binding Ig light chain	IPI0056389	IPI	21559420	upregulated	proteomics	LC-MS/MS	ENSG00000205143
spinal cord injury	C4	contusion	1d	10116	Sprague-Dawley	spinal cord;CSF	Apolipoprotein A-I	IPI00197703	IPI	21559420	upregulated	proteomics	LC-MS/MS	ENSG00000118137
spinal cord injury	C4	contusion	1d	10116	Sprague-Dawley	spinal cord;CSF	alpha-1-microglobulin/bikunin precursor	IPI00210900	IPI	21559420	upregulated	proteomics	LC-MS/MS	ENSG00000106927
spinal cord injury	C4	contusion	1d	10116	Sprague-Dawley	spinal cord;CSF	C-reactive protein	IPI00188225	IPI	21559420	upregulated	proteomics	LC-MS/MS	ENSG00000132693
spinal cord injury	C4	contusion	1d	10116	Sprague-Dawley	spinal cord;CSF	L-lactate dehydrogenase B chain	IPI00231783	IPI	21559420	upregulated	proteomics	LC-MS/MS	ENSG00000111716
spinal cord injury	C4	contusion	1d	10116	Sprague-Dawley	spinal cord;CSF	Apolipoprotein H	IPI00778633	IPI	21559420	upregulated	proteomics	LC-MS/MS	ENSG00000091583
spinal cord injury	C4	contusion	1d	10116	Sprague-Dawley	spinal cord;CSF	Secretogranin-3	IPI00191139	IPI	21559420	downregulated	proteomics	LC-MS/MS	ENSG00000104112
spinal cord injury	C4	contusion	1d	10116	Sprague-Dawley	spinal cord;CSF	FAM3C-like protein	IPI00331757	IPI	21559420	downregulated	proteomics	LC-MS/MS	ENSG00000196937
spinal cord injury	C4	contusion	1d	10116	Sprague-Dawley	spinal cord;CSF	Alpha-2-macroglobulin	IPI00392886	IPI	21559420	upregulated	proteomics	LC-MS/MS	ENSG00000175899
spinal cord injury	C4	contusion	1d	10116	Sprague-Dawley	spinal cord;CSF	Complement C3	IPI00480639	IPI	21559420	upregulated	proteomics	LC-MS/MS	ENSG00000125730
spinal cord injury	C4	contusion	1d	10116	Sprague-Dawley	spinal cord;CSF	Beta-2-microglobulin	IPI00204359	IPI	21559420	downregulated	proteomics	LC-MS/MS	ENSG00000166710
spinal cord injury	C4	contusion	1d	10116	Sprague-Dawley	spinal cord;CSF	14-3-3 protein gamma	IPI00230835	IPI	21559420	upregulated	proteomics	LC-MS/MS	ENSG00000170027
spinal cord injury	C4	contusion	1d	10116	Sprague-Dawley	spinal cord;CSF	Complement factor 1	IPI00204451	IPI	21559420	upregulated	proteomics	LC-MS/MS	ENSG00000205403
spinal cord injury	C4	contusion	1d	10116	Sprague-Dawley	spinal cord;CSF	Prothrombin (Fragment)	IPI00189981	IPI	21559420	upregulated	proteomics	LC-MS/MS	ENSG00000180210
spinal cord injury	C4	contusion	1d	10116	Sprague-Dawley	spinal cord;CSF	Inter-alpha-trypsin inhibitor heavy chain H3	IPI00326984	IPI	21559420	upregulated	proteomics	LC-MS/MS	ENSG00000162267
spinal cord injury	C4	contusion	1d	10116	Sprague-Dawley	spinal cord;CSF	Protein kinase C-binding protein	IPI00568410	IPI	21559420	downregulated	proteomics	LC-MS/MS	ENSG00000184613
spinal cord injury	C4	contusion	1d	10116	Sprague-Dawley	spinal cord;CSF	T-cadherin	IPI00200257	IPI	21559420	downregulated	proteomics	LC-MS/MS	ENSG00000140945
spinal cord injury	C4	contusion	1d	10116	Sprague-Dawley	spinal cord;CSF	Isoform 1 of Limbic system-associated membrane protein	IPI00209114	IPI	21559420	downregulated	proteomics	LC-MS/MS	ENSG00000185565
spinal cord injury	C4	contusion	1d	10116	Sprague-Dawley	spinal cord;CSF	Neuroendocrine protein 7B2	IPI00199030	IPI	21559420	downregulated	proteomics	LC-MS/MS	ENSG00000166922
spinal cord injury	C4	contusion	1d	10116	Sprague-Dawley	spinal cord;CSF	Inter-alpha-inhibitor H4 heavy chain	IPI00188541	IPI	21559420	upregulated	proteomics	LC-MS/MS	ENSG00000055955
spinal cord injury	C4	contusion	1d	10116	Sprague-Dawley	spinal cord;CSF	Carbonic anhydrase 1	IPI00360930	IPI	21559420	upregulated	proteomics	LC-MS/MS	ENSG00000133742
spinal cord injury	C4	contusion	1d	10116	Sprague-Dawley	spinal cord;CSF	Alpha-1-acid glycoprotein	IPI00191715	IPI	21559420	upregulated	proteomics	LC-MS/MS	ENSG00000228278
spinal cord injury	C4	contusion	1d	10116	Sprague-Dawley	spinal cord;CSF	Alpha-1-acid glycoprotein	IPI00191715	IPI	21559420	upregulated	proteomics	LC-MS/MS	ENSG00000229314
spinal cord injury	C4	contusion	1d	10116	Sprague-Dawley	spinal cord;CSF	Protein S100-A8	IPI00231370	IPI	21559420	upregulated	proteomics	LC-MS/MS	ENSG00000143546
spinal cord injury	C4	contusion	1d	10116	Sprague-Dawley	spinal cord;CSF	Peroxiredoxin-2	IPI00201561	IPI	21559420	upregulated	proteomics	LC-MS/MS	ENSG00000167815
spinal cord injury	C4	contusion	1d	10116	Sprague-Dawley	spinal cord;CSF	Carbonic anhydrase 2	IPI00230787	IPI	21559420	upregulated	proteomics	LC-MS/MS	ENSG00000104267
spinal cord injury	C4	contusion	12d	10116	Sprague-Dawley	spinal cord;CSF	matrix metalloproteinase-8	O88766	UniProt	22687332	upregulated	proteomics	microarray	ENSG00000118113
spinal cord injury	lumbar	ischemia	1hr	9986	New Zealand	spinal cord;parenchyma	Annexin A1	P51662	UniProt	25657690	upregulated	proteomics	2-DE	ENSG00000135046
spinal cord injury	lumbar	ischemia	1hr	9986	New Zealand	spinal cord;parenchyma	Calgranulin B	P50117	UniProt	25657690	upregulated	proteomics	2-DE	ENSG00000163220
spinal cord injury	lumbar	ischemia	1hr	9986	New Zealand	spinal cord;parenchyma	Carbonic anhydrase II	P00919	UniProt	25657690	downregulated	proteomics	2-DE	ENSG00000104267
spinal cord injury	lumbar	ischemia	2d	9986	New Zealand	spinal cord;parenchyma	Mitogen-activated protein kinase 1	P29678	UniProt	25657690	upregulated	proteomics	2-DE	ENSG00000169032
spinal cord injury	lumbar	ischemia	1d	9986	New Zealand	spinal cord;parenchyma	Neurofilament Protein M	854353	GI	23752265	upregulated	proteomics	2-DE	ENSG00000104722
spinal cord injury	lumbar	ischemia	1d	9986	New Zealand	spinal cord;parenchyma	Neurofilament Protein M	854353	GI	23752265	downregulated	proteomics	2-DE	ENSG00000104722
spinal cord injury	lumbar	ischemia	1d	9986	New Zealand	spinal cord;parenchyma	Ubiquitin-Activating Enzyme E1	126722847	GI	23752265	downregulated	proteomics	2-DE	ENSG00000130985
spinal cord injury	lumbar	ischemia	1d	9986	New Zealand	spinal cord;parenchyma	Dynamin 1	P13666	UniProt	23752265	downregulated	proteomics	2-DE	ENSG00000185739
spinal cord injury	lumbar	ischemia	1d	9986	New Zealand	spinal cord;parenchyma	Chain A, Glycogen Phosphorylase B	195927243	GI	23752265	downregulated	proteomics	2-DE	ENSG00000068976
spinal cord injury	lumbar	ischemia	1d	9986	New Zealand	spinal cord;parenchyma	Brain Glycogen Phosphorylase	P12798	UniProt	23752265	downregulated	proteomics	2-DE	ENSG00000102893
spinal cord injury	T10	contusion	1d	10116	Long-Evans	spinal cord;parenchyma	Glial fibrillary acidic protein	P47819	UniProt	23963509	downregulated	proteomics	iTRAQ	ENSG00000131095
spinal cord injury	T10	contusion	1d	10116	Long-Evans	spinal cord;parenchyma	Tubulin beta-3 chain	Q4QRB4	UniProt	23963509	downregulated	proteomics	iTRAQ	ENSG00000258947
spinal cord injury	T10	contusion	1d	10116	Long-Evans	spinal cord;parenchyma	Serum albumin precursor	P02770	UniProt	23963509	upregulated	proteomics	iTRAQ	ENSG00000163631
spinal cord injury	T10	contusion	1d	10116	Long-Evans	spinal cord;parenchyma	Fructose-bisphosphate aldolase C	P09117	UniProt	23963509	downregulated	proteomics	iTRAQ	ENSG00000109107
spinal cord injury	T10	contusion	1d	10116	Long-Evans	spinal cord;parenchyma	Glutamate dehydrogenase 1	P10860	UniProt	23963509	upregulated	proteomics	iTRAQ	ENSG00000182890
spinal cord injury	T10	contusion	1d	10116	Long-Evans	spinal cord;parenchyma	Glutamate dehydrogenase 1	P10860	UniProt	23963509	upregulated	proteomics	iTRAQ	ENSG00000148672
spinal cord injury	T10	contusion	1d	10116	Long-Evans	spinal cord;parenchyma	Clathrin heavy chain 1	P11442	UniProt	23963509	downregulated	proteomics	iTRAQ	ENSG00000141367
spinal cord injury	T10	contusion	1d	10116	Long-Evans	spinal cord;parenchyma	Ras-related protein Rab-3A	P63012	UniProt	23963509	upregulated	proteomics	iTRAQ	ENSG00000105649
spinal cord injury	T10	contusion	1d	10116	Long-Evans	spinal cord;parenchyma	Secernin-1	Q6AY84	UniProt	23963509	downregulated	proteomics	iTRAQ	ENSG00000136193
spinal cord injury	T10	contusion	1d	10116	Long-Evans	spinal cord;parenchyma	Carbonic anhydrase 2	P27139	UniProt	23963509	upregulated	proteomics	iTRAQ	ENSG00000104267
spinal cord injury	T10	contusion	1d	10116	Long-Evans	spinal cord;parenchyma	C-reactive protein precursor	P48199	UniProt	23963509	upregulated	proteomics	iTRAQ	ENSG00000132693
spinal cord injury	T10	contusion	1d	10116	Long-Evans	spinal cord;parenchyma	Serotransferrin precursor	P12346	UniProt	23963509	upregulated	proteomics	iTRAQ	ENSG00000091513
spinal cord injury	T10	contusion	35d	10116	Sprague-Dawley	spinal cord;parenchyma	Enoyl-CoA hydratase domain-containing protein	Q6AYG5	UniProt	24004276	downregulated	proteomics	2-DE	ENSG00000093144
spinal cord injury	T10	contusion	35d	10116	Sprague-Dawley	spinal cord;parenchyma	Pyruvate kinase isoyzymes M1/M2	P11980	UniProt	24004276	downregulated	proteomics	2-DE	ENSG00000067225
spinal cord injury	T10	contusion	35d	10116	Sprague-Dawley	spinal cord;parenchyma	2',3'-cyclic-nucleotide 3'prosphodiesterase	P13233	UniProt	24004276	downregulated	proteomics	2-DE	ENSG00000173786
spinal cord injury	T10	contusion	35d	10116	Sprague-Dawley	spinal cord;parenchyma	Peroxiredoxin-6	O35244	UniProt	24004276	downregulated	proteomics	2-DE	ENSG00000117592
spinal cord injury	T10	contusion	35d	10116	Sprague-Dawley	spinal cord;parenchyma	COP9 signaolosome complex subunit 8	Q6P4Z9	UniProt	24004276	downregulated	proteomics	2-DE	ENSG00000198612
spinal cord injury	T10	contusion	35d	10116	Sprague-Dawley	spinal cord;parenchyma	Alpha-soluble NSF attachment protein	P54921	UniProt	24004276	downregulated	proteomics	2-DE	ENSG00000105402
spinal cord injury	T10	contusion	35d	10116	Sprague-Dawley	spinal cord;parenchyma	Stathmin OS	P13668	UniProt	24004276	downregulated	proteomics	2-DE	ENSG00000117632
spinal cord injury	T10	contusion	35d	10116	Sprague-Dawley	spinal cord;parenchyma	Histidine triad nucleotide-binding protein 1	P62959	UniProt	24004276	downregulated	proteomics	2-DE	ENSG00000169567
spinal cord injury	T10	contusion	35d	10116	Sprague-Dawley	spinal cord;parenchyma	L-lactate dehydrogenase B chain	P42123	UniProt	24004276	downregulated	proteomics	2-DE	ENSG00000111716
spinal cord injury	T10	contusion	35d	10116	Sprague-Dawley	spinal cord;parenchyma	Nucleolar RNA helicase 2	Q3B8Q1	UniProt	24004276	downregulated	proteomics	2-DE	ENSG00000165732
spinal cord injury	T10	contusion	35d	10116	Sprague-Dawley	spinal cord;parenchyma	Ubiquitin-40S ribosomal protein S27a	P62982	UniProt	24004276	upregulated	proteomics	2-DE	ENSG00000143947
spinal cord injury	T10	contusion	35d	10116	Sprague-Dawley	spinal cord;parenchyma	Fibroblast growth factor 23	Q8VI82	UniProt	24004276	upregulated	proteomics	2-DE	ENSG00000118972
spinal cord injury	T10	contusion	35d	10116	Sprague-Dawley	spinal cord;parenchyma	Glial fibrillary acidic protein	P47819	UniProt	24004276	upregulated	proteomics	2-DE	ENSG00000131095
spinal cord injury	T10	contusion	35d	10116	Sprague-Dawley	spinal cord;parenchyma	Pleckstrin homology domain-containing family B member	Q9WU68	UniProt	24004276	upregulated	proteomics	2-DE	ENSG00000021300
spinal cord injury	T10	contusion	35d	10116	Sprague-Dawley	spinal cord;parenchyma	Protein disulfide-isomerase A3	P11598	UniProt	24004276	upregulated	proteomics	2-DE	ENSG00000167004
spinal cord injury	T10	contusion	35d	10116	Sprague-Dawley	spinal cord;parenchyma	CCR4-NOT transcription complex subunit 10	Q5XIA4	UniProt	24004276	upregulated	proteomics	2-DE	ENSG00000182973
spinal cord injury	T10	contusion	35d	10116	Sprague-Dawley	spinal cord;parenchyma	Splicing factor U2AF 26kDa subunit	Q7TP17	UniProt	24004276	upregulated	proteomics	2-DE	ENSG00000161265
spinal cord injury	T10	contusion	35d	10116	Sprague-Dawley	spinal cord;parenchyma	Fructose-bisphosphate aldolase C	P09117	UniProt	24004276	upregulated	proteomics	2-DE	ENSG00000109107
spinal cord injury	T10	contusion	35d	10116	Sprague-Dawley	spinal cord;parenchyma	Glutathione S-transferase Mu 5	Q9Z1B2	UniProt	24004276	upregulated	proteomics	2-DE	ENSG00000134202
spinal cord injury	T10	contusion	35d	10116	Sprague-Dawley	spinal cord;parenchyma	Mitogen-activated protein kinase 3	P21708	UniProt	24004276	upregulated	proteomics	2-DE	ENSG00000102882
spinal cord injury	T10	contusion	35d	10116	Sprague-Dawley	spinal cord;parenchyma	D-3-phosphoglycerate dehydrogenase	O08651	UniProt	24004276	upregulated	proteomics	2-DE	ENSG00000092621
spinal cord injury	T10	contusion	35d	10116	Sprague-Dawley	spinal cord;parenchyma	Fascin	P85845	UniProt	24004276	upregulated	proteomics	2-DE	ENSG00000075618
spinal cord injury	T10	transection	1d	10116	Wistar	spinal cord;parenchyma	Ribonuclease inhibitor isoform a	NP_001257691	RefSeq	24288130	upregulated	proteomics	immunoblot	ENSG00000023191
spinal cord injury	T10	transection	3d	10116	Wistar	spinal cord;parenchyma	Ribonuclease inhibitor isoform a	NP_001257691	RefSeq	24288130	upregulated	proteomics	immunoblot	ENSG00000023191
spinal cord injury	T10	transection	5d	10116	Wistar	spinal cord;parenchyma	Ribonuclease inhibitor isoform a	NP_001257691	RefSeq	24288130	upregulated	proteomics	immunoblot	ENSG00000023191
spinal cord injury	T9	contusion	8hr	10116	Sprague-Dawley	spinal cord;parenchyma	Uncharacterized protein	IPI00464440	IPI	24499940	upregulated	proteomics	iTRAQ	ENSG00000164466
spinal cord injury	T9	contusion	8hr	10116	Sprague-Dawley	spinal cord;parenchyma	Oligosaccharyltransferase complex subunit OSTC	IPI00373430	IPI	24499940	upregulated	proteomics	iTRAQ	ENSG00000198856
spinal cord injury	T9	contusion	8hr	10116	Sprague-Dawley	spinal cord;parenchyma	Uncharacterized protein	IPI00368457	IPI	24499940	upregulated	proteomics	iTRAQ	ENSG00000189369
spinal cord injury	T9	contusion	8hr	10116	Sprague-Dawley	spinal cord;parenchyma	Uncharacterized protein	IPI00368457	IPI	24499940	upregulated	proteomics	iTRAQ	ENSG00000103342
spinal cord injury	T9	contusion	8hr	10116	Sprague-Dawley	spinal cord;parenchyma	Olfactory receptor Olf1121	IPI00187805	IPI	24499940	downregulated	proteomics	iTRAQ	ENSG00000170929
spinal cord injury	T9	contusion	8hr	10116	Sprague-Dawley	spinal cord;parenchyma	ATP synthase protein 8	IPI00195772	IPI	24499940	downregulated	proteomics	iTRAQ	ENSG00000228253
spinal cord injury	T9	contusion	8hr	10116	Sprague-Dawley	spinal cord;parenchyma	Uncharacterized protein	IPI00206354	IPI	24499940	upregulated	proteomics	iTRAQ	ENSG00000130748
spinal cord injury	T9	contusion	8hr	10116	Sprague-Dawley	spinal cord;parenchyma	Transcription elongation factor B polypeptide 2	IPI00210012	IPI	24499940	upregulated	proteomics	iTRAQ	ENSG00000103363
spinal cord injury	T9	contusion	8hr	10116	Sprague-Dawley	spinal cord;parenchyma	Small VCP/p97-interacting protein	IPI00561657	IPI	24499940	upregulated	proteomics	iTRAQ	ENSG00000198168
spinal cord injury	T9	contusion	8hr	10116	Sprague-Dawley	spinal cord;parenchyma	Uncharacterized protein	IPI00471762	IPI	24499940	downregulated	proteomics	iTRAQ	ENSG00000008282
spinal cord injury	T9	contusion	8hr	10116	Sprague-Dawley	spinal cord;parenchyma	Peptidyl-prolyl cis-trans isomerase FKBP1A	IPI00231434	IPI	24499940	upregulated	proteomics	iTRAQ	ENSG00000088832
spinal cord injury	T9	contusion	8hr	10116	Sprague-Dawley	spinal cord;parenchyma	Vcuolar protein sorting-associated protein 4A	IPI00204016	IPI	24499940	upregulated	proteomics	iTRAQ	ENSG00000132612
spinal cord injury	T9	contusion	8hr	10116	Sprague-Dawley	spinal cord;parenchyma	Isoform 2 of Basigin	IPI00193425	IPI	24499940	downregulated	proteomics	iTRAQ	ENSG00000172270
spinal cord injury	T9	contusion	8hr	10116	Sprague-Dawley	spinal cord;parenchyma	Thioredoxin-like 1	IPI00231368	IPI	24499940	downregulated	proteomics	iTRAQ	ENSG00000136810
spinal cord injury	T9	contusion	8hr	10116	Sprague-Dawley	spinal cord;parenchyma	Uncharacterized protein	IPI00421427	IPI	24499940	upregulated	proteomics	iTRAQ	ENSG00000130876
spinal cord injury	T9	contusion	8hr	10116	Sprague-Dawley	spinal cord;parenchyma	60S ribosomal protein L11	IPI00359103	IPI	24499940	downregulated	proteomics	iTRAQ	ENSG00000142676
spinal cord injury	T9	contusion	8hr	10116	Sprague-Dawley	spinal cord;parenchyma	Heat shock protein HSP 90-beta	IPI00471584	IPI	24499940	downregulated	proteomics	iTRAQ	ENSG00000096384
spinal cord injury	T9	contusion	8hr	10116	Sprague-Dawley	spinal cord;parenchyma	Heat shock 70-kDa protein 4	IPI00387868	IPI	24499940	downregulated	proteomics	iTRAQ	ENSG00000170606
spinal cord injury	T9	contusion	8hr	10116	Sprague-Dawley	spinal cord;parenchyma	10-kDa heat shock protein, mitochondrial	IPI00326433	IPI	24499940	downregulated	proteomics	iTRAQ	ENSG00000115541
spinal cord injury	T9	contusion	8hr	10116	Sprague-Dawley	spinal cord;parenchyma	Heat shock protein 105 kDa	IPI00471835	IPI	24499940	upregulated	proteomics	iTRAQ	ENSG00000120694
spinal cord injury	T9	contusion	8hr	10116	Sprague-Dawley	spinal cord;parenchyma	Heat shock protein 75 kDa, mitochondrial	IPI00369217	IPI	24499940	upregulated	proteomics	iTRAQ	ENSG00000126602
spinal cord injury	T9	contusion	8hr	10116	Sprague-Dawley	spinal cord;parenchyma	60-kDa heat shock protein, mitochondrial	IPI00339148	IPI	24499940	downregulated	proteomics	iTRAQ	ENSG00000144381
spinal cord injury	T9	contusion	8hr	10116	Sprague-Dawley	spinal cord;parenchyma	Heat shock protein HSP 90-alpha	IPI00210566	IPI	24499940	downregulated	proteomics	iTRAQ	ENSG00000080824
spinal cord injury	T9	contusion	8hr	10116	Sprague-Dawley	spinal cord;parenchyma	Heat shock cognate 71-kDa protein	IPI00208205	IPI	24499940	downregulated	proteomics	iTRAQ	ENSG00000109971
spinal cord injury	T9	contusion	8hr	10116	Sprague-Dawley	spinal cord;parenchyma	Heat shock-rleated 70-kDa protein 2	IPI00207355	IPI	24499940	upregulated	proteomics	iTRAQ	ENSG00000126803
spinal cord injury	T9	contusion	8hr	10116	Sprague-Dawley	spinal cord;parenchyma	Heat shock 70-kDa protein 13	IPI00206300	IPI	24499940	downregulated	proteomics	iTRAQ	ENSG00000155304
spinal cord injury	T9	contusion	8hr	10116	Sprague-Dawley	spinal cord;parenchyma	Heat shock factor-binding protein 1	IPI00202706	IPI	24499940	downregulated	proteomics	iTRAQ	ENSG00000230989
spinal cord injury	T9	contusion	8hr	10116	Sprague-Dawley	spinal cord;parenchyma	Heat shock protein beta-1	IPI00201586	IPI	24499940	downregulated	proteomics	iTRAQ	ENSG00000106211
spinal cord injury	T11	transection	14d	10116	Sprague-Dawley	spinal cord;parenchyma	Synaptosomal-associated protein 25	P60881	UniProt	24519330	downregulated	proteomics	western blot	ENSG00000132639
spinal cord injury	T11	transection	28d	10116	Sprague-Dawley	spinal cord;parenchyma	Synaptosomal-associated protein 25	P60881	UniProt	24519330	downregulated	proteomics	western blot	ENSG00000132639
spinal cord injury	L2	human	7d	9606	human	spinal cord;CSF	Haptoglobin	P00738	UniProt	25350754	downregulated	proteomics	DIGE	ENSG00000257017
spinal cord injury	L2	human	7d	9606	human	spinal cord;CSF	Zinc alpha 2 glycoprotein	P25311	UniProt	25350754	downregulated	proteomics	DIGE	ENSG00000160862
spinal cord injury	L2	human	7d	9606	human	spinal cord;CSF	Transferrin	P02787	UniProt	25350754	upregulated	proteomics	DIGE	ENSG00000091513
spinal cord injury	L2	human	7d	9606	human	spinal cord;CSF	Beta-2-glycoprotein I-precursor (Apolipoprotein H)	P02749	UniProt	25350754	upregulated	proteomics	DIGE	ENSG00000091583
spinal cord injury	L2	human	7d	9606	human	spinal cord;CSF	General transcription factor 3C polypeptide 5	Q12789	UniProt	25350754	upregulated	proteomics	DIGE	ENSG00000077235
spinal cord injury	L2	human	7d	9606	human	spinal cord;CSF	Serum albumin precursor	P02768	UniProt	25350754	upregulated	proteomics	DIGE	ENSG00000163631
spinal cord injury	L2	human	7d	9606	human	spinal cord;CSF	Ig gamma-2 chain C region	P01859	UniProt	25350754	upregulated	proteomics	DIGE	ENSG00000211893
spinal cord injury	L2	human	15-60d	9606	human	spinal cord;CSF	Haptoglobin	P00738	UniProt	25350754	upregulated	proteomics	DIGE	ENSG00000257017
spinal cord injury	L2	human	15-60d	9606	human	spinal cord;CSF	Zinc alpha 2 glycoprotein	P25311	UniProt	25350754	upregulated	proteomics	DIGE	ENSG00000160862
spinal cord injury	L2	human	15-60d	9606	human	spinal cord;CSF	Transferrin	P02787	UniProt	25350754	upregulated	proteomics	DIGE	ENSG00000091513
spinal cord injury	L2	human	15-60d	9606	human	spinal cord;CSF	Beta-2-glycoprotein I-precursor (Apolipoprotein H)	P02749	UniProt	25350754	downregulated	proteomics	DIGE	ENSG00000091583
spinal cord injury	L2	human	15-60d	9606	human	spinal cord;CSF	General transcription factor 3C polypeptide 5	Q12789	UniProt	25350754	downregulated	proteomics	DIGE	ENSG00000077235
spinal cord injury	L2	human	15-60d	9606	human	spinal cord;CSF	Serum albumin precursor	P02768	UniProt	25350754	upregulated	proteomics	DIGE	ENSG00000163631
spinal cord injury	L2	human	15-60d	9606	human	spinal cord;CSF	Ig gamma-2 chain C region	P01859	UniProt	25350754	upregulated	proteomics	DIGE	ENSG00000211893
spinal cord injury	lumbar	ischemia	1d	9986	New Zealand	spinal cord;parenchyma	neurofilament protein M	P54938	UniProt	25374588	upregulated	proteomics	2-DE	ENSG00000104722
spinal cord injury	T9	balloon compression	7d	10116	Wistar	spinal cord;parenchyma	Plasma membrane 1, isoform CRA_b	P11505	UniProt	26348665	upregulated	proteomics	NanoLC-HR- MS/MS	ENSG00000070961
spinal cord injury	T9	balloon compression	7d	10116	Wistar	spinal cord;parenchyma	Ganglioside-induced differentiation-associated-protein 1	D4A5X7	UniProt	26348665	upregulated	proteomics	NanoLC-HR- MS/MS	ENSG00000104381
spinal cord injury	T9	balloon compression	7d	10116	Wistar	spinal cord;parenchyma	Myristoylated alanine-rich C-kinase substrate	F1LMW7	UniProt	26348665	upregulated	proteomics	NanoLC-HR- MS/MS	ENSG00000277443
spinal cord injury	T9	balloon compression	7d	10116	Wistar	spinal cord;parenchyma	NADH dehydrogenase 1 alpha subcomplex	F1LXA0	UniProt	26348665	upregulated	proteomics	NanoLC-HR- MS/MS	ENSG00000184752
spinal cord injury	T9	balloon compression	7d	10116	Wistar	spinal cord;parenchyma	2,4-dienoyl-CoA reductase, CRA_a	Q64591	UniProt	26348665	upregulated	proteomics	NanoLC-HR- MS/MS	ENSG00000104325
spinal cord injury	T9	balloon compression	7d	10116	Wistar	spinal cord;parenchyma	Apolipoprotein D	P23593	UniProt	26348665	upregulated	proteomics	NanoLC-HR- MS/MS	ENSG00000189058
spinal cord injury	T9	balloon compression	7d	10116	Wistar	spinal cord;parenchyma	Sodium- and chloride-dependent GABA transporter 3	P31647	UniProt	26348665	upregulated	proteomics	NanoLC-HR- MS/MS	ENSG00000132164
spinal cord injury	T9	balloon compression	7d	10116	Wistar	spinal cord;parenchyma	14-3-3 protein beta/alpha	P35213	UniProt	26348665	upregulated	proteomics	NanoLC-HR- MS/MS	ENSG00000166913
spinal cord injury	T9	balloon compression	7d	10116	Wistar	spinal cord;parenchyma	Rho-related GTP-binding protein RhoB	P62747	UniProt	26348665	upregulated	proteomics	NanoLC-HR- MS/MS	ENSG00000143878
spinal cord injury	T9	balloon compression	7d	10116	Wistar	spinal cord;parenchyma	3-mercaptopyruvate sulfurtransferase	P97532	UniProt	26348665	upregulated	proteomics	NanoLC-HR- MS/MS	ENSG00000128309
spinal cord injury	T9	balloon compression	7d	10116	Wistar	spinal cord;parenchyma	Synapticvesicleglycoprotein 2A	Q02563	UniProt	26348665	upregulated	proteomics	NanoLC-HR- MS/MS	ENSG00000159164
spinal cord injury	T9	balloon compression	7d	10116	Wistar	spinal cord;parenchyma	Valine-tRNA ligase	Q04462	UniProt	26348665	upregulated	proteomics	NanoLC-HR- MS/MS	ENSG00000096171
spinal cord injury	T9	balloon compression	7d	10116	Wistar	spinal cord;parenchyma	Glycolipidtransferprotein	B0BNM9	UniProt	26348665	upregulated	proteomics	NanoLC-HR- MS/MS	ENSG00000139433
spinal cord injury	T9	balloon compression	7d	10116	Wistar	spinal cord;parenchyma	ProteinPgp	D3ZDK7	UniProt	26348665	upregulated	proteomics	NanoLC-HR- MS/MS	ENSG00000184207
spinal cord injury	T9	balloon compression	7d	10116	Wistar	spinal cord;parenchyma	Chaperonin subunit 8, isoform CRA_a	D4ACB8	UniProt	26348665	upregulated	proteomics	NanoLC-HR- MS/MS	ENSG00000156261
spinal cord injury	T9	balloon compression	7d	10116	Wistar	spinal cord;parenchyma	Stress-induced-phosphoprotein 1	O35814	UniProt	26348665	upregulated	proteomics	NanoLC-HR- MS/MS	ENSG00000168439
spinal cord injury	T9	balloon compression	7d	10116	Wistar	spinal cord;parenchyma	Calreticulin	P18418	UniProt	26348665	upregulated	proteomics	NanoLC-HR- MS/MS	ENSG00000179218
spinal cord injury	T9	balloon compression	7d	10116	Wistar	spinal cord;parenchyma	Proteasomesubunit beta type-1	Q6PDW4	UniProt	26348665	upregulated	proteomics	NanoLC-HR- MS/MS	ENSG00000008018
spinal cord injury	T9	balloon compression	7d	10116	Wistar	spinal cord;parenchyma	Dodecenoyl-Coenzyme A delta isomerase	Q68G41	UniProt	26348665	upregulated	proteomics	NanoLC-HR- MS/MS	ENSG00000167969
spinal cord injury	T9	balloon compression	7d	10116	Wistar	spinal cord;parenchyma	ATP synthase subunit d, mitochondrial	P31399	UniProt	26348665	upregulated	proteomics	NanoLC-HR- MS/MS	ENSG00000167863
spinal cord injury	T9	balloon compression	7d	10116	Wistar	spinal cord;parenchyma	UMP-CMP kinase	Q4KM73	UniProt	26348665	upregulated	proteomics	NanoLC-HR- MS/MS	ENSG00000162368
spinal cord injury	T9	balloon compression	7d	10116	Wistar	spinal cord;parenchyma	Ubiquitin-like modifier-activatingenzy. 1	Q5U300	UniProt	26348665	upregulated	proteomics	NanoLC-HR- MS/MS	ENSG00000130985
spinal cord injury	T9	balloon compression	7d	10116	Wistar	spinal cord;parenchyma	LETM1 and EF-hand domain protein 1	Q5XIN6	UniProt	26348665	upregulated	proteomics	NanoLC-HR- MS/MS	ENSG00000168924
spinal cord injury	T9	balloon compression	7d	10116	Wistar	spinal cord;parenchyma	Succinatedehydrogenaseflavoprotein	Q920L2	UniProt	26348665	upregulated	proteomics	NanoLC-HR- MS/MS	ENSG00000073578
spinal cord injury	T9	balloon compression	7d	10116	Wistar	spinal cord;parenchyma	Ras-relatedprotein Rab-6A	Q9WVB1	UniProt	26348665	upregulated	proteomics	NanoLC-HR- MS/MS	ENSG00000175582
spinal cord injury	T9	balloon compression	10d	10116	Wistar	spinal cord;parenchyma	Protein Sucla2	F1LM47	UniProt	26348665	upregulated	proteomics	NanoLC-HR- MS/MS	ENSG00000136143
spinal cord injury	T9	balloon compression	10d	10116	Wistar	spinal cord;parenchyma	Peroxiredoxin-6	O35244	UniProt	26348665	upregulated	proteomics	NanoLC-HR- MS/MS	ENSG00000117592
spinal cord injury	T9	balloon compression	10d	10116	Wistar	spinal cord;parenchyma	Myelin-associatedglycoprotein	P07722	UniProt	26348665	upregulated	proteomics	NanoLC-HR- MS/MS	ENSG00000105695
spinal cord injury	T9	balloon compression	10d	10116	Wistar	spinal cord;parenchyma	Tricarboxylate transport protein	P32089	UniProt	26348665	upregulated	proteomics	NanoLC-HR- MS/MS	ENSG00000100075
spinal cord injury	T9	balloon compression	10d	10116	Wistar	spinal cord;parenchyma	Multifunctionalprotein ADE2	P51583	UniProt	26348665	upregulated	proteomics	NanoLC-HR- MS/MS	ENSG00000128050
spinal cord injury	T9	balloon compression	10d	10116	Wistar	spinal cord;parenchyma	Protein Sypl1	Q66H18	UniProt	26348665	upregulated	proteomics	NanoLC-HR- MS/MS	ENSG00000008282
spinal cord injury	T9	balloon compression	10d	10116	Wistar	spinal cord;parenchyma	T-complexprotein 1 subunit epsilon	Q68FQ0	UniProt	26348665	upregulated	proteomics	NanoLC-HR- MS/MS	ENSG00000150753
spinal cord injury	T9	balloon compression	10d	10116	Wistar	spinal cord;parenchyma	Vesicle-fusing ATPase	Q9QUL6	UniProt	26348665	upregulated	proteomics	NanoLC-HR- MS/MS	ENSG00000073969
spinal cord injury	T9	balloon compression	10d	10116	Wistar	spinal cord;parenchyma	LanC-likeprotein 1	Q9QX69	UniProt	26348665	upregulated	proteomics	NanoLC-HR- MS/MS	ENSG00000115365
spinal cord injury	T9	balloon compression	10d	10116	Wistar	spinal cord;parenchyma	Septin-9	Q9QZR6	UniProt	26348665	upregulated	proteomics	NanoLC-HR- MS/MS	ENSG00000184640
spinal cord injury	T9	balloon compression	7d	10116	Wistar	spinal cord;parenchyma	Protein Rab5c	B0BNK1	UniProt	26348665	upregulated	proteomics	NanoLC-HR- MS/MS	ENSG00000108774
spinal cord injury	T9	balloon compression	7d	10116	Wistar	spinal cord;parenchyma	Dihydropyrimidinaserelatedprotein2	P47942	UniProt	26348665	upregulated	proteomics	NanoLC-HR- MS/MS	ENSG00000092964
spinal cord injury	T9	balloon compression	7d	10116	Wistar	spinal cord;parenchyma	F-actin-capping protein subunit alpha-1	B2GUZ5	UniProt	26348665	upregulated	proteomics	NanoLC-HR- MS/MS	ENSG00000116489
spinal cord injury	T9	balloon compression	7d	10116	Wistar	spinal cord;parenchyma	Neurofascin	P97685	UniProt	26348665	upregulated	proteomics	NanoLC-HR- MS/MS	ENSG00000163531
spinal cord injury	T9	balloon compression	7d	10116	Wistar	spinal cord;parenchyma	MAGUK p55 subfamily member 3	G3V9L3	UniProt	26348665	upregulated	proteomics	NanoLC-HR- MS/MS	ENSG00000108861
spinal cord injury	T9	balloon compression	7d	10116	Wistar	spinal cord;parenchyma	NADH dehydrogenaseflavoprotein 2	P19234	UniProt	26348665	upregulated	proteomics	NanoLC-HR- MS/MS	ENSG00000178127
spinal cord injury	T9	balloon compression	10d	10116	Wistar	spinal cord;parenchyma	Dynactinsubunit 1	P28023	UniProt	26348665	upregulated	proteomics	NanoLC-HR- MS/MS	ENSG00000204843
spinal cord injury	T9	balloon compression	10d	10116	Wistar	spinal cord;parenchyma	ProteinRdx	E9PT65	UniProt	26348665	upregulated	proteomics	NanoLC-HR- MS/MS	ENSG00000137710
spinal cord injury	T9	balloon compression	10d	10116	Wistar	spinal cord;parenchyma	Vacuolar protein sorting protein 35	G3V8A5	UniProt	26348665	upregulated	proteomics	NanoLC-HR- MS/MS	ENSG00000069329
spinal cord injury	T9	balloon compression	10d	10116	Wistar	spinal cord;parenchyma	Chloride intracellular channel protein 4	Q9Z0W7	UniProt	26348665	upregulated	proteomics	NanoLC-HR- MS/MS	ENSG00000169504
spinal cord injury	T9	balloon compression	10d	10116	Wistar	spinal cord;parenchyma	Glia maturation factor beta	Q63228	UniProt	26348665	upregulated	proteomics	NanoLC-HR- MS/MS	ENSG00000197045
spinal cord injury	T9	balloon compression	10d	10116	Wistar	spinal cord;parenchyma	AP-2 complexsubunit alpha-2	P18484	UniProt	26348665	upregulated	proteomics	NanoLC-HR- MS/MS	ENSG00000183020
spinal cord injury	T9	balloon compression	10d	10116	Wistar	spinal cord;parenchyma	Peroxisomalmultifunctional enzyme type 2	P97852	UniProt	26348665	upregulated	proteomics	NanoLC-HR- MS/MS	ENSG00000133835
spinal cord injury	T9	balloon compression	10d	10116	Wistar	spinal cord;parenchyma	Xaa-Pro dipeptidase	Q5I0D7	UniProt	26348665	upregulated	proteomics	NanoLC-HR- MS/MS	ENSG00000124299
spinal cord injury	T9	balloon compression	10d	10116	Wistar	spinal cord;parenchyma	NDRG2	Q8VBU2	UniProt	26348665	upregulated	proteomics	NanoLC-HR- MS/MS	ENSG00000165795
spinal cord injury	T8	transection	14d	10116	Sprague-Dawley	spinal cord;parenchyma	Albumin	55391508	GI	26593060	upregulated	proteomics	MS/MS	ENSG00000163631
spinal cord injury	T8	transection	14d	10116	Sprague-Dawley	spinal cord;parenchyma	Calreticulin	11693172	GI	26593060	upregulated	proteomics	MS/MS	ENSG00000179218
spinal cord injury	T8	transection	14d	10116	Sprague-Dawley	spinal cord;parenchyma	Ubiquitin carboxy- terminal hydrolase L1	61098212	GI	26593060	upregulated	proteomics	MS/MS	ENSG00000154277
spinal cord injury	T8	transection	14d	10116	Sprague-Dawley	spinal cord;parenchyma	Rho GDP-dissociation inhibitor alpha	Q5XI73	UniProt	26593060	upregulated	proteomics	MS/MS	ENSG00000141522
spinal cord injury	T8	transection	14d	10116	Sprague-Dawley	spinal cord;parenchyma	Enolase 2, Gamma	26023949	GI	26593060	upregulated	proteomics	MS/MS	ENSG00000111674
spinal cord injury	T8	transection	14d	10116	Sprague-Dawley	spinal cord;parenchyma	Aldolase C	6978489	GI	26593060	upregulated	proteomics	MS/MS	ENSG00000109107
spinal cord injury	T8	transection	14d	10116	Sprague-Dawley	spinal cord;parenchyma	Glycerol-3-phosphate dehydrogenase1	57527919	GI	26593060	upregulated	proteomics	MS/MS	ENSG00000167588
spinal cord injury	T8	transection	14d	10116	Sprague-Dawley	spinal cord;parenchyma	Triosephosphate isomerase-1	38512111	GI	26593060	upregulated	proteomics	MS/MS	ENSG00000111669
spinal cord injury	T8	transection	14d	10116	Sprague-Dawley	spinal cord;parenchyma	Glutathione S- Transferase	NP_036709	RefSeq	26593060	upregulated	proteomics	MS/MS	ENSG00000084207
spinal cord injury	T8	transection	14d	10116	Sprague-Dawley	spinal cord;parenchyma	Eukaryotic translation initiation factor5A	Q3T1J1	UniProt	26593060	upregulated	proteomics	MS/MS	ENSG00000132507
spinal cord injury	T8	transection	14d	10116	Sprague-Dawley	spinal cord;parenchyma	Cytochrome c oxidase, subunit Va	55992	GI	26593060	upregulated	proteomics	MS/MS	ENSG00000188976
spinal cord injury	T8	transection	14d	10116	Sprague-Dawley	spinal cord;parenchyma	Cytochrome c oxidase, subunit Va	55992	GI	26593060	upregulated	proteomics	MS/MS	ENSG00000160741
spinal cord injury	T8	transection	14d	10116	Sprague-Dawley	spinal cord;parenchyma	Cytochrome c oxidase, subunit Va	55992	GI	26593060	upregulated	proteomics	MS/MS	ENSG00000163472
spinal cord injury	T8	transection	14d	10116	Sprague-Dawley	spinal cord;parenchyma	Cytochrome c oxidase, subunit Va	55992	GI	26593060	upregulated	proteomics	MS/MS	ENSG00000135940
spinal cord injury	T8	transection	14d	10116	Sprague-Dawley	spinal cord;parenchyma	Fatty acid-binding Protein	1836058	GI	26593060	upregulated	proteomics	MS/MS	ENSG00000164687
spinal cord injury	T8	transection	14d	10116	Sprague-Dawley	spinal cord;parenchyma	Alpha-enolase	56757324	GI	26593060	upregulated	proteomics	MS/MS	ENSG00000074800
spinal cord injury	T8	transection	14d	10116	Sprague-Dawley	spinal cord;parenchyma	Annexin 1	6978501	GI	26593060	downregulated	proteomics	MS/MS	ENSG00000135046
spinal cord injury	T8	transection	14d	10116	Sprague-Dawley	spinal cord;parenchyma	Glyceraldehyde-3- phosphate dehydrogenase	8393418	GI	26593060	downregulated	proteomics	MS/MS	ENSG00000111640
spinal cord injury	T8	transection	14d	10116	Sprague-Dawley	spinal cord;parenchyma	Mitochondrial ribosomal protein L13	55741549	GI	26593060	downregulated	proteomics	MS/MS	ENSG00000172172
spinal cord injury	T8	transection	14d	10116	Sprague-Dawley	spinal cord;parenchyma	Serotransferrin	P12346	UniProt	26593060	downregulated	proteomics	MS/MS	ENSG00000091513
spinal cord injury	T8	transection	14d	10116	Sprague-Dawley	spinal cord;parenchyma	Vimentin	14389299	GI	26593060	downregulated	proteomics	MS/MS	ENSG00000026025
spinal cord injury	T10	contusion	56d	10116	Sprague-Dawley	spinal cord;parenchyma	Isoform 3 of Agrin	P25304	UniProt	26899371	upregulated	proteomics	LC-MS/MS	ENSG00000188157
spinal cord injury	T10	contusion	56d	10116	Sprague-Dawley	spinal cord;parenchyma	Asporin	Q5XIH1	UniProt	26899371	upregulated	proteomics	LC-MS/MS	ENSG00000106819
spinal cord injury	T10	contusion	56d	10116	Sprague-Dawley	spinal cord;parenchyma	Biglycan	P47853	UniProt	26899371	upregulated	proteomics	LC-MS/MS	ENSG00000182492
spinal cord injury	T10	contusion	56d	10116	Sprague-Dawley	spinal cord;parenchyma	Brevican, isoform CRA_a	G3V8G4	UniProt	26899371	upregulated	proteomics	LC-MS/MS	ENSG00000132692
spinal cord injury	T10	contusion	56d	10116	Sprague-Dawley	spinal cord;parenchyma	Clusterin	P05371	UniProt	26899371	upregulated	proteomics	LC-MS/MS	ENSG00000120885
spinal cord injury	T10	contusion	56d	10116	Sprague-Dawley	spinal cord;parenchyma	Collagen alpha-1(I) chain	P02454	UniProt	26899371	upregulated	proteomics	LC-MS/MS	ENSG00000108821
spinal cord injury	T10	contusion	56d	10116	Sprague-Dawley	spinal cord;parenchyma	Collagen alpha-1(III) chain	P13941	UniProt	26899371	upregulated	proteomics	LC-MS/MS	ENSG00000168542
spinal cord injury	T10	contusion	56d	10116	Sprague-Dawley	spinal cord;parenchyma	Collagen alpha-1(V) chain	Q9JI03	UniProt	26899371	upregulated	proteomics	LC-MS/MS	ENSG00000130635
spinal cord injury	T10	contusion	56d	10116	Sprague-Dawley	spinal cord;parenchyma	Protein Col6a1	D3ZUL3	UniProt	26899371	upregulated	proteomics	LC-MS/MS	ENSG00000142156
spinal cord injury	T10	contusion	56d	10116	Sprague-Dawley	spinal cord;parenchyma	Procollagen, type XVIII, alpha 1	F1LR02	UniProt	26899371	upregulated	proteomics	LC-MS/MS	ENSG00000182871
spinal cord injury	T10	contusion	56d	10116	Sprague-Dawley	spinal cord;parenchyma	Collagen alpha-2(I) chain	P02466	UniProt	26899371	upregulated	proteomics	LC-MS/MS	ENSG00000164692
spinal cord injury	T10	contusion	56d	10116	Sprague-Dawley	spinal cord;parenchyma	Protein Col4a2	F1M6Q3	UniProt	26899371	upregulated	proteomics	LC-MS/MS	ENSG00000134871
spinal cord injury	T10	contusion	56d	10116	Sprague-Dawley	spinal cord;parenchyma	Procollagen, type VI, alpha 2, isoform CRA_a	F1LNH3	UniProt	26899371	upregulated	proteomics	LC-MS/MS	ENSG00000142173
spinal cord injury	T10	contusion	56d	10116	Sprague-Dawley	spinal cord;parenchyma	Decorin	Q01129	UniProt	26899371	upregulated	proteomics	LC-MS/MS	ENSG00000011465
spinal cord injury	T10	contusion	56d	10116	Sprague-Dawley	spinal cord;parenchyma	Protein Dag1	F1M8K0	UniProt	26899371	upregulated	proteomics	LC-MS/MS	ENSG00000173402
spinal cord injury	T10	contusion	56d	10116	Sprague-Dawley	spinal cord;parenchyma	Fibromodulin	P50609	UniProt	26899371	upregulated	proteomics	LC-MS/MS	ENSG00000122176
spinal cord injury	T10	contusion	56d	10116	Sprague-Dawley	spinal cord;parenchyma	Fibronectin	P04937	UniProt	26899371	upregulated	proteomics	LC-MS/MS	ENSG00000115414
spinal cord injury	T10	contusion	56d	10116	Sprague-Dawley	spinal cord;parenchyma	Galectin-1	P11762	UniProt	26899371	upregulated	proteomics	LC-MS/MS	ENSG00000100097
spinal cord injury	T10	contusion	56d	10116	Sprague-Dawley	spinal cord;parenchyma	Galectin-3	P08699	UniProt	26899371	upregulated	proteomics	LC-MS/MS	ENSG00000131981
spinal cord injury	T10	contusion	56d	10116	Sprague-Dawley	spinal cord;parenchyma	Galectin-3 binding protein	O70513	UniProt	26899371	upregulated	proteomics	LC-MS/MS	ENSG00000108679
spinal cord injury	T10	contusion	56d	10116	Sprague-Dawley	spinal cord;parenchyma	Hyaluronan and proteoglycan link protein 1	P03994	UniProt	26899371	upregulated	proteomics	LC-MS/MS	ENSG00000145681
spinal cord injury	T10	contusion	56d	10116	Sprague-Dawley	spinal cord;parenchyma	Laminin, alpha 1	D4A409	UniProt	26899371	upregulated	proteomics	LC-MS/MS	ENSG00000101680
spinal cord injury	T10	contusion	56d	10116	Sprague-Dawley	spinal cord;parenchyma	Protein Lama2 (Fragment)	F1M614	UniProt	26899371	upregulated	proteomics	LC-MS/MS	ENSG00000196569
spinal cord injury	T10	contusion	56d	10116	Sprague-Dawley	spinal cord;parenchyma	Protein Lama4	F1LTF8	UniProt	26899371	upregulated	proteomics	LC-MS/MS	ENSG00000112769
spinal cord injury	T10	contusion	56d	10116	Sprague-Dawley	spinal cord;parenchyma	Laminin, alpha 5	F1MAN8	UniProt	26899371	upregulated	proteomics	LC-MS/MS	ENSG00000130702
spinal cord injury	T10	contusion	56d	10116	Sprague-Dawley	spinal cord;parenchyma	Protein Lamb1	D3ZQN7	UniProt	26899371	upregulated	proteomics	LC-MS/MS	ENSG00000091136
spinal cord injury	T10	contusion	56d	10116	Sprague-Dawley	spinal cord;parenchyma	Protein Lamc1	F1MAA7	UniProt	26899371	upregulated	proteomics	LC-MS/MS	ENSG00000135862
spinal cord injury	T10	contusion	56d	10116	Sprague-Dawley	spinal cord;parenchyma	Lumican	P51886	UniProt	26899371	upregulated	proteomics	LC-MS/MS	ENSG00000139329
spinal cord injury	T10	contusion	56d	10116	Sprague-Dawley	spinal cord;parenchyma	Microfibrillar associated protein 5	D3ZJB1	UniProt	26899371	upregulated	proteomics	LC-MS/MS	ENSG00000197614
spinal cord injury	T10	contusion	56d	10116	Sprague-Dawley	spinal cord;parenchyma	Osteoglycin (Predicted)	D3ZVB7	UniProt	26899371	upregulated	proteomics	LC-MS/MS	ENSG00000106809
spinal cord injury	T10	contusion	56d	10116	Sprague-Dawley	spinal cord;parenchyma	Nidogen-1	F1LM84	UniProt	26899371	upregulated	proteomics	LC-MS/MS	ENSG00000116962
spinal cord injury	T10	contusion	56d	10116	Sprague-Dawley	spinal cord;parenchyma	Nidogen-2	B5DFC9	UniProt	26899371	upregulated	proteomics	LC-MS/MS	ENSG00000087303
spinal cord injury	T10	contusion	56d	10116	Sprague-Dawley	spinal cord;parenchyma	SPARC	P16975	UniProt	26899371	upregulated	proteomics	LC-MS/MS	ENSG00000113140
spinal cord injury	T10	contusion	56d	10116	Sprague-Dawley	spinal cord;parenchyma	Osteopontin	P08721	UniProt	26899371	upregulated	proteomics	LC-MS/MS	ENSG00000118785
spinal cord injury	T10	contusion	56d	10116	Sprague-Dawley	spinal cord;parenchyma	Periostin	D3ZAF5	UniProt	26899371	upregulated	proteomics	LC-MS/MS	ENSG00000133110
spinal cord injury	T10	contusion	56d	10116	Sprague-Dawley	spinal cord;parenchyma	Prolargin	Q9EQP5	UniProt	26899371	upregulated	proteomics	LC-MS/MS	ENSG00000188783
spinal cord injury	T10	contusion	56d	10116	Sprague-Dawley	spinal cord;parenchyma	Tenascin-R	Q05546	UniProt	26899371	upregulated	proteomics	LC-MS/MS	ENSG00000116147
spinal cord injury	T10	contusion	56d	10116	Sprague-Dawley	spinal cord;parenchyma	Protein Tgfbi	D4A8G5	UniProt	26899371	upregulated	proteomics	LC-MS/MS	ENSG00000120708
spinal cord injury	T10	contusion	56d	10116	Sprague-Dawley	spinal cord;parenchyma	Versican	Q9ERB4	UniProt	26899371	upregulated	proteomics	LC-MS/MS	ENSG00000038427
spinal cord injury	T10	contusion	56d	10116	Sprague-Dawley	spinal cord;parenchyma	Protein Vtn	Q3KR94	UniProt	26899371	upregulated	proteomics	LC-MS/MS	ENSG00000109072
spinal cord injury	T10	contusion	56d	10116	Sprague-Dawley	spinal cord;parenchyma	Actin-related protein 2/3 complex subunit 1B	O88656	UniProt	26899371	upregulated	proteomics	LC-MS/MS	ENSG00000130429
spinal cord injury	T10	contusion	56d	10116	Sprague-Dawley	spinal cord;parenchyma	Annexin A1	P07150	UniProt	26899371	upregulated	proteomics	LC-MS/MS	ENSG00000135046
spinal cord injury	T10	contusion	56d	10116	Sprague-Dawley	spinal cord;parenchyma	Annexin A2	Q07936	UniProt	26899371	upregulated	proteomics	LC-MS/MS	ENSG00000182718
spinal cord injury	T10	contusion	56d	10116	Sprague-Dawley	spinal cord;parenchyma	Apolipoprotein E	P02650	UniProt	26899371	upregulated	proteomics	LC-MS/MS	ENSG00000130203
spinal cord injury	T10	contusion	56d	10116	Sprague-Dawley	spinal cord;parenchyma	Beta-2-microglobulin	P07151	UniProt	26899371	upregulated	proteomics	LC-MS/MS	ENSG00000166710
spinal cord injury	T10	contusion	56d	10116	Sprague-Dawley	spinal cord;parenchyma	Calreticulin	P18418	UniProt	26899371	upregulated	proteomics	LC-MS/MS	ENSG00000179218
spinal cord injury	T10	contusion	56d	10116	Sprague-Dawley	spinal cord;parenchyma	Cathepsin B	P00787	UniProt	26899371	upregulated	proteomics	LC-MS/MS	ENSG00000164733
spinal cord injury	T10	contusion	56d	10116	Sprague-Dawley	spinal cord;parenchyma	Cathepsin D	P24268	UniProt	26899371	upregulated	proteomics	LC-MS/MS	ENSG00000117984
spinal cord injury	T10	contusion	56d	10116	Sprague-Dawley	spinal cord;parenchyma	Pro-Cathepsin H	P00786	UniProt	26899371	upregulated	proteomics	LC-MS/MS	ENSG00000103811
spinal cord injury	T10	contusion	56d	10116	Sprague-Dawley	spinal cord;parenchyma	CD9 antigen	P40241	UniProt	26899371	upregulated	proteomics	LC-MS/MS	ENSG00000010278
spinal cord injury	T10	contusion	56d	10116	Sprague-Dawley	spinal cord;parenchyma	Cystatin-C	P14841	UniProt	26899371	upregulated	proteomics	LC-MS/MS	ENSG00000101439
spinal cord injury	T10	contusion	56d	10116	Sprague-Dawley	spinal cord;parenchyma	Endoplasmic reticulum resident protein 29	P52555	UniProt	26899371	upregulated	proteomics	LC-MS/MS	ENSG00000089248
spinal cord injury	T10	contusion	56d	10116	Sprague-Dawley	spinal cord;parenchyma	Elongation factor 1-alpha 1	P62630	UniProt	26899371	upregulated	proteomics	LC-MS/MS	ENSG00000156508
spinal cord injury	T10	contusion	56d	10116	Sprague-Dawley	spinal cord;parenchyma	Eukaryotic translation initiation factor 5	Q07205	UniProt	26899371	upregulated	proteomics	LC-MS/MS	ENSG00000100664
spinal cord injury	T10	contusion	56d	10116	Sprague-Dawley	spinal cord;parenchyma	Ezrin	P31977	UniProt	26899371	upregulated	proteomics	LC-MS/MS	ENSG00000092820
spinal cord injury	T10	contusion	56d	10116	Sprague-Dawley	spinal cord;parenchyma	Gap junction alpha-1 protein	P08050	UniProt	26899371	upregulated	proteomics	LC-MS/MS	ENSG00000152661
spinal cord injury	T10	contusion	56d	10116	Sprague-Dawley	spinal cord;parenchyma	Glial fibrillary acidic protein	P47819	UniProt	26899371	upregulated	proteomics	LC-MS/MS	ENSG00000131095
spinal cord injury	T10	contusion	56d	10116	Sprague-Dawley	spinal cord;parenchyma	Granulins	P23785	UniProt	26899371	upregulated	proteomics	LC-MS/MS	ENSG00000030582
spinal cord injury	T10	contusion	56d	10116	Sprague-Dawley	spinal cord;parenchyma	Lysosome-associated membrane glycoprotein 1	P14562	UniProt	26899371	upregulated	proteomics	LC-MS/MS	ENSG00000185896
spinal cord injury	T10	contusion	56d	10116	Sprague-Dawley	spinal cord;parenchyma	Moesin (Fragment)	O35763	UniProt	26899371	upregulated	proteomics	LC-MS/MS	ENSG00000147065
spinal cord injury	T10	contusion	56d	10116	Sprague-Dawley	spinal cord;parenchyma	Protein Myh1	F1LRV9	UniProt	26899371	upregulated	proteomics	LC-MS/MS	ENSG00000109061
spinal cord injury	T10	contusion	56d	10116	Sprague-Dawley	spinal cord;parenchyma	Protein disulfide-isomerase	P04785	UniProt	26899371	upregulated	proteomics	LC-MS/MS	ENSG00000185624
spinal cord injury	T10	contusion	56d	10116	Sprague-Dawley	spinal cord;parenchyma	60S Ribosomal protein L10a	P62907	UniProt	26899371	upregulated	proteomics	LC-MS/MS	ENSG00000198755
spinal cord injury	T10	contusion	56d	10116	Sprague-Dawley	spinal cord;parenchyma	60S ribosomal protein L10a	P62907	UniProt	26899371	upregulated	proteomics	LC-MS/MS	ENSG00000198755
spinal cord injury	T10	contusion	56d	10116	Sprague-Dawley	spinal cord;parenchyma	60S Ribosomal protein L12	P23358	UniProt	26899371	upregulated	proteomics	LC-MS/MS	ENSG00000197958
spinal cord injury	T10	contusion	56d	10116	Sprague-Dawley	spinal cord;parenchyma	60S Ribosomal protein L15	P61314	UniProt	26899371	upregulated	proteomics	LC-MS/MS	ENSG00000174748
spinal cord injury	T10	contusion	56d	10116	Sprague-Dawley	spinal cord;parenchyma	60S Ribosomal protein L18	P12001	UniProt	26899371	upregulated	proteomics	LC-MS/MS	ENSG00000063177
spinal cord injury	T10	contusion	56d	10116	Sprague-Dawley	spinal cord;parenchyma	40S Ribosomal protein S6	P62755	UniProt	26899371	upregulated	proteomics	LC-MS/MS	ENSG00000137154
spinal cord injury	T10	contusion	56d	10116	Sprague-Dawley	spinal cord;parenchyma	Translocon-associated protein subunit delta	Q07984	UniProt	26899371	upregulated	proteomics	LC-MS/MS	ENSG00000180879
spinal cord injury	T10	contusion	56d	10116	Sprague-Dawley	spinal cord;parenchyma	4F2 cell-surface antigen heavy chain Slc3a2	Q794F9	UniProt	26899371	upregulated	proteomics	LC-MS/MS	ENSG00000168003
spinal cord injury	T10	contusion	56d	10116	Sprague-Dawley	spinal cord;parenchyma	Protein Tln1	G3V852	UniProt	26899371	upregulated	proteomics	LC-MS/MS	ENSG00000137076
spinal cord injury	T10	contusion	56d	10116	Sprague-Dawley	spinal cord;parenchyma	Tropomyosin alpha-4 chain	P09495	UniProt	26899371	upregulated	proteomics	LC-MS/MS	ENSG00000167460
spinal cord injury	T10	contusion	56d	10116	Sprague-Dawley	spinal cord;parenchyma	Vimentin	P31000	UniProt	26899371	upregulated	proteomics	LC-MS/MS	ENSG00000026025
spinal cord injury	T9	contusion	1d	10116	Fischer	spinal cord;parenchyma	Glyceraldehyde-3-phosphate dehydrogenase	P04797	UniProt	27150525	upregulated	proteomics	CAX-PAGELC-MS/MS	ENSG00000111640
spinal cord injury	T9	contusion	1d	10116	Fischer	spinal cord;parenchyma	Alcohol dehydrogenase [NADP(+)]	P51635	UniProt	27150525	upregulated	proteomics	CAX-PAGELC-MS/MS	ENSG00000117448
spinal cord injury	T9	contusion	1d	10116	Fischer	spinal cord;parenchyma	Annexin A2	Q07936	UniProt	27150525	upregulated	proteomics	CAX-PAGELC-MS/MS	ENSG00000182718
spinal cord injury	T9	contusion	1d	10116	Fischer	spinal cord;parenchyma	Triosephosphate isomerase (TPI-1)	P48500	UniProt	27150525	upregulated	proteomics	CAX-PAGELC-MS/MS	ENSG00000111669
spinal cord injury	T9	contusion	1d	10116	Fischer	spinal cord;parenchyma	Glutathione S-transferase Mu5	Q9Z1B2	UniProt	27150525	upregulated	proteomics	CAX-PAGELC-MS/MS	ENSG00000134202
spinal cord injury	T9	contusion	1d	10116	Fischer	spinal cord;parenchyma	Serotransferrin (Transferrin)	P12346	UniProt	27150525	upregulated	proteomics	CAX-PAGELC-MS/MS	ENSG00000091513
spinal cord injury	T9	contusion	1d	10116	Fischer	spinal cord;parenchyma	Aminoacylase-1A	Q6AYS7	UniProt	27150525	upregulated	proteomics	CAX-PAGELC-MS/MS	ENSG00000243989
spinal cord injury	T9	contusion	1d	10116	Fischer	spinal cord;parenchyma	Transketolase	P50137	UniProt	27150525	upregulated	proteomics	CAX-PAGELC-MS/MS	ENSG00000163931
spinal cord injury	T9	contusion	1d	10116	Fischer	spinal cord;parenchyma	Nucleoside diphosphate kinase A	Q05982	UniProt	27150525	upregulated	proteomics	CAX-PAGELC-MS/MS	ENSG00000239672
spinal cord injury	T9	contusion	1d	10116	Fischer	spinal cord;parenchyma	Stathmin	P13668	UniProt	27150525	upregulated	proteomics	CAX-PAGELC-MS/MS	ENSG00000117632
spinal cord injury	T9	contusion	1d	10116	Fischer	spinal cord;parenchyma	Gamma-enolase	P07323	UniProt	27150525	upregulated	proteomics	CAX-PAGELC-MS/MS	ENSG00000111674
spinal cord injury	T9	contusion	1d	10116	Fischer	spinal cord;parenchyma	Elongation factor 2	P05197	UniProt	27150525	upregulated	proteomics	CAX-PAGELC-MS/MS	ENSG00000167658
spinal cord injury	T9	contusion	1d	10116	Fischer	spinal cord;parenchyma	Phosphorylase	P09812	UniProt	27150525	upregulated	proteomics	CAX-PAGELC-MS/MS	ENSG00000068976
spinal cord injury	T9	contusion	1d	10116	Fischer	spinal cord;parenchyma	Cytoplasmic aconitate hydratase	Q63270	UniProt	27150525	upregulated	proteomics	CAX-PAGELC-MS/MS	ENSG00000122729
spinal cord injury	T9	contusion	1d	10116	Fischer	spinal cord;parenchyma	Protein TLln1	G3V852	UniProt	27150525	upregulated	proteomics	CAX-PAGELC-MS/MS	ENSG00000137076
spinal cord injury	T9	contusion	1d	10116	Fischer	spinal cord;parenchyma	Fatty acid synthase	P12785	UniProt	27150525	upregulated	proteomics	CAX-PAGELC-MS/MS	ENSG00000169710
spinal cord injury	T9	contusion	1d	10116	Fischer	spinal cord;parenchyma	Peroxiredoxin-2	P35704	UniProt	27150525	upregulated	proteomics	CAX-PAGELC-MS/MS	ENSG00000167815
spinal cord injury	T9	contusion	1d	10116	Fischer	spinal cord;parenchyma	Annexin A2	Q07936	UniProt	27150525	downregulated	proteomics	CAX-PAGELC-MS/MS	ENSG00000182718
spinal cord injury	T9	contusion	1d	10116	Fischer	spinal cord;parenchyma	Isocitrate dehydrogenase [NADP] cytoplasmic	Q8VI04	UniProt	27150525	downregulated	proteomics	CAX-PAGELC-MS/MS	ENSG00000162174
spinal cord injury	T9	contusion	1d	10116	Fischer	spinal cord;parenchyma	Mannose-6-phosphate isomerase	Q68FX1	UniProt	27150525	downregulated	proteomics	CAX-PAGELC-MS/MS	ENSG00000178802
spinal cord injury	T9	contusion	1d	10116	Fischer	spinal cord;parenchyma	Aminoacylase-1A	Q6AYS7	UniProt	27150525	downregulated	proteomics	CAX-PAGELC-MS/MS	ENSG00000243989
spinal cord injury	T9	contusion	1d	10116	Fischer	spinal cord;parenchyma	Pyridoxal kinase	O35331	UniProt	27150525	downregulated	proteomics	CAX-PAGELC-MS/MS	ENSG00000160209
spinal cord injury	T9	contusion	1d	10116	Fischer	spinal cord;parenchyma	Ester hydrolase C11orf54 h4 homolog	Q5U2Q3	UniProt	27150525	downregulated	proteomics	CAX-PAGELC-MS/MS	ENSG00000182919
spinal cord injury	T9	contusion	1d	10116	Fischer	spinal cord;parenchyma	Alpha-enolase	P04764	UniProt	27150525	downregulated	proteomics	CAX-PAGELC-MS/MS	ENSG00000074800
spinal cord injury	T9	contusion	1d	10116	Fischer	spinal cord;parenchyma	Rab GDP dissociation inhibitor beta	P50399	UniProt	27150525	downregulated	proteomics	CAX-PAGELC-MS/MS	ENSG00000057608
spinal cord injury	T9	contusion	1d	10116	Fischer	spinal cord;parenchyma	Triosephosphate isomerase (TPI-1)	P48500	UniProt	27150525	downregulated	proteomics	CAX-PAGELC-MS/MS	ENSG00000111669
spinal cord injury	T9	contusion	1d	10116	Fischer	spinal cord;parenchyma	Dihydropteridine reductase	P11348	UniProt	27150525	downregulated	proteomics	CAX-PAGELC-MS/MS	ENSG00000151552
spinal cord injury	T9	contusion	1d	10116	Fischer	spinal cord;parenchyma	Sepiapterin reductase	P18297	UniProt	27150525	downregulated	proteomics	CAX-PAGELC-MS/MS	ENSG00000116096
spinal cord injury	T9	contusion	1d	10116	Fischer	spinal cord;parenchyma	Adenylate kinase 3	P29411	UniProt	27150525	downregulated	proteomics	CAX-PAGELC-MS/MS	ENSG00000147853
spinal cord injury	T9	contusion	1d	10116	Fischer	spinal cord;parenchyma	Stathmin	P13668	UniProt	27150525	downregulated	proteomics	CAX-PAGELC-MS/MS	ENSG00000117632
spinal cord injury	T9	contusion	1d	10116	Fischer	spinal cord;parenchyma	Nucleoside diphosphate kinase A	Q05982	UniProt	27150525	downregulated	proteomics	CAX-PAGELC-MS/MS	ENSG00000239672
spinal cord injury	T9	contusion	1d	10116	Fischer	spinal cord;parenchyma	Phosphoglycerate mutase 1	P25113	UniProt	27150525	downregulated	proteomics	CAX-PAGELC-MS/MS	ENSG00000171314
spinal cord injury	T9	contusion	1d	10116	Fischer	spinal cord;parenchyma	Astrocytic phosphoprotein PEA-15 (PEA-15)	Q5U318	UniProt	27150525	downregulated	proteomics	CAX-PAGELC-MS/MS	ENSG00000162734
spinal cord injury	T9	contusion	1d	10116	Fischer	spinal cord;parenchyma	Phosphohistidine phosphatase 1 (predicted), isoform CRA_a	D3ZP47	UniProt	27150525	downregulated	proteomics	CAX-PAGELC-MS/MS	ENSG00000054148
spinal cord injury	T9	contusion	1d	10116	Fischer	spinal cord;parenchyma	Protein Pmp2	D3ZFG5	UniProt	27150525	downregulated	proteomics	CAX-PAGELC-MS/MS	ENSG00000147588
spinal cord injury	T9	contusion	7d	10116	Fischer	spinal cord;parenchyma	Annexin A1	P07150	UniProt	27150525	upregulated	proteomics	CAX-PAGELC-MS/MS	ENSG00000135046
spinal cord injury	T9	contusion	7d	10116	Fischer	spinal cord;parenchyma	Annexin A2	Q07936	UniProt	27150525	upregulated	proteomics	CAX-PAGELC-MS/MS	ENSG00000182718
spinal cord injury	T9	contusion	7d	10116	Fischer	spinal cord;parenchyma	Glyceraldehyde-3-phosphate dehydrogenase	P04797	UniProt	27150525	upregulated	proteomics	CAX-PAGELC-MS/MS	ENSG00000111640
spinal cord injury	T9	contusion	7d	10116	Fischer	spinal cord;parenchyma	Alcohol dehydrogenase [NADP(+)]	P51635	UniProt	27150525	upregulated	proteomics	CAX-PAGELC-MS/MS	ENSG00000117448
spinal cord injury	T9	contusion	7d	10116	Fischer	spinal cord;parenchyma	Pyruvate kinase PKM	P11980	UniProt	27150525	upregulated	proteomics	CAX-PAGELC-MS/MS	ENSG00000067225
spinal cord injury	T9	contusion	7d	10116	Fischer	spinal cord;parenchyma	Catalase	P04762	UniProt	27150525	upregulated	proteomics	CAX-PAGELC-MS/MS	ENSG00000121691
spinal cord injury	T9	contusion	7d	10116	Fischer	spinal cord;parenchyma	Acyl-CoA synthetase family member 2, mitochondrial	Q499N5	UniProt	27150525	upregulated	proteomics	CAX-PAGELC-MS/MS	ENSG00000167107
spinal cord injury	T9	contusion	7d	10116	Fischer	spinal cord;parenchyma	Aspartate aminotransferase, mitochondrial	P00507	UniProt	27150525	upregulated	proteomics	CAX-PAGELC-MS/MS	ENSG00000125166
spinal cord injury	T9	contusion	7d	10116	Fischer	spinal cord;parenchyma	Glutathione S-transferase Mu5	Q9Z1B2	UniProt	27150525	upregulated	proteomics	CAX-PAGELC-MS/MS	ENSG00000134202
spinal cord injury	T9	contusion	7d	10116	Fischer	spinal cord;parenchyma	Protein-L-isoaspartate(D-aspartate)	P22062	UniProt	27150525	upregulated	proteomics	CAX-PAGELC-MS/MS	ENSG00000120265
spinal cord injury	T9	contusion	7d	10116	Fischer	spinal cord;parenchyma	Triosephosphate isomerase (TPI-1)	P48500	UniProt	27150525	upregulated	proteomics	CAX-PAGELC-MS/MS	ENSG00000111669
spinal cord injury	T9	contusion	7d	10116	Fischer	spinal cord;parenchyma	Serotransferrin	P12346	UniProt	27150525	upregulated	proteomics	CAX-PAGELC-MS/MS	ENSG00000091513
spinal cord injury	T9	contusion	7d	10116	Fischer	spinal cord;parenchyma	Junction plakoglobin	Q6P0K8	UniProt	27150525	upregulated	proteomics	CAX-PAGELC-MS/MS	ENSG00000173801
spinal cord injury	T9	contusion	7d	10116	Fischer	spinal cord;parenchyma	Aspartate aminotransferase, cytoplasmic	P13221	UniProt	27150525	upregulated	proteomics	CAX-PAGELC-MS/MS	ENSG00000120053
spinal cord injury	T9	contusion	7d	10116	Fischer	spinal cord;parenchyma	Cathepsin D	Q6P6T6	UniProt	27150525	upregulated	proteomics	CAX-PAGELC-MS/MS	ENSG00000117984
spinal cord injury	T9	contusion	7d	10116	Fischer	spinal cord;parenchyma	Macrophage-capping protein	Q6AYC4	UniProt	27150525	upregulated	proteomics	CAX-PAGELC-MS/MS	ENSG00000042493
spinal cord injury	T9	contusion	7d	10116	Fischer	spinal cord;parenchyma	Fructose-bisphosphate aldolase A	P05065	UniProt	27150525	upregulated	proteomics	CAX-PAGELC-MS/MS	ENSG00000149925
spinal cord injury	T9	contusion	7d	10116	Fischer	spinal cord;parenchyma	3-ketoacyl-CoA thiolase A, peroxisomal	P21775	UniProt	27150525	upregulated	proteomics	CAX-PAGELC-MS/MS	ENSG00000060971
spinal cord injury	T9	contusion	7d	10116	Fischer	spinal cord;parenchyma	Cathepsin D	P24268	UniProt	27150525	upregulated	proteomics	CAX-PAGELC-MS/MS	ENSG00000117984
spinal cord injury	T9	contusion	7d	10116	Fischer	spinal cord;parenchyma	Glutathione S-transferase Yb-3	P08009	UniProt	27150525	upregulated	proteomics	CAX-PAGELC-MS/MS	ENSG00000213366
spinal cord injury	T9	contusion	7d	10116	Fischer	spinal cord;parenchyma	Serotransferrin (Transferrin)	P12346	UniProt	27150525	upregulated	proteomics	CAX-PAGELC-MS/MS	ENSG00000091513
spinal cord injury	T9	contusion	7d	10116	Fischer	spinal cord;parenchyma	Annexin A2	Q07936	UniProt	27150525	downregulated	proteomics	CAX-PAGELC-MS/MS	ENSG00000182718
spinal cord injury	T9	contusion	7d	10116	Fischer	spinal cord;parenchyma	Alcohol dehydrogenase [NADP(+)]	P51635	UniProt	27150525	downregulated	proteomics	CAX-PAGELC-MS/MS	ENSG00000117448
spinal cord injury	T9	contusion	7d	10116	Fischer	spinal cord;parenchyma	L-lactate dehydrogenase B chain	P42123	UniProt	27150525	downregulated	proteomics	CAX-PAGELC-MS/MS	ENSG00000111716
spinal cord injury	T9	contusion	7d	10116	Fischer	spinal cord;parenchyma	Aspartate aminotransferase, cytoplasmic	P13221	UniProt	27150525	downregulated	proteomics	CAX-PAGELC-MS/MS	ENSG00000120053
spinal cord injury	T9	contusion	7d	10116	Fischer	spinal cord;parenchyma	Fumarylacetoacetase	P25093	UniProt	27150525	downregulated	proteomics	CAX-PAGELC-MS/MS	ENSG00000103876
spinal cord injury	T9	contusion	7d	10116	Fischer	spinal cord;parenchyma	Cathepsin D	Q6P6T6	UniProt	27150525	downregulated	proteomics	CAX-PAGELC-MS/MS	ENSG00000117984
spinal cord injury	T9	contusion	7d	10116	Fischer	spinal cord;parenchyma	Acyl-CoA synthetase family member 2, mitochondrial	Q499N5	UniProt	27150525	downregulated	proteomics	CAX-PAGELC-MS/MS	ENSG00000167107
spinal cord injury	T9	contusion	7d	10116	Fischer	spinal cord;parenchyma	Protein-L-isoaspartate(D-aspartate) O-methyltransferase	P22062	UniProt	27150525	downregulated	proteomics	CAX-PAGELC-MS/MS	ENSG00000120265
spinal cord injury	T9	contusion	7d	10116	Fischer	spinal cord;parenchyma	Ribosyldihydronicotinamide dehydrogenase [quinone]	Q6AY80	UniProt	27150525	downregulated	proteomics	CAX-PAGELC-MS/MS	ENSG00000124588
spinal cord injury	T9	contusion	7d	10116	Fischer	spinal cord;parenchyma	ATP citrate lyase, isoform CRA_a	G3V888	UniProt	27150525	downregulated	proteomics	CAX-PAGELC-MS/MS	ENSG00000131473
spinal cord injury	T9	contusion	7d	10116	Fischer	spinal cord;parenchyma	Phosphorylase	P09812	UniProt	27150525	downregulated	proteomics	CAX-PAGELC-MS/MS	ENSG00000068976
spinal cord injury	T9	contusion	7d	10116	Fischer	spinal cord;parenchyma	Cytoplasmic aconitate hydratase	Q63270	UniProt	27150525	downregulated	proteomics	CAX-PAGELC-MS/MS	ENSG00000122729
spinal cord injury	T9	contusion	7d	10116	Fischer	spinal cord;parenchyma	Hexokinase-1	P05708	UniProt	27150525	downregulated	proteomics	CAX-PAGELC-MS/MS	ENSG00000156515
spinal cord injury	T9	balloon compression	3d	10116	Wistar	spinal cord;parenchyma	C-X-C motif chemokine 2	P30348	UniProt	24860426	upregulated	proteomics	NanoLC-HR-MS/MS	ENSG00000163739
spinal cord injury	T9	balloon compression	3d	10116	Wistar	spinal cord;parenchyma	C-X-C motif chemokine 2	P30348	UniProt	24860426	upregulated	proteomics	NanoLC-HR-MS/MS	ENSG00000163734
spinal cord injury	T9	balloon compression	3d	10116	Wistar	spinal cord;parenchyma	CXC chemokine RTCK1	Q99ME0	UniProt	24860426	upregulated	proteomics	NanoLC-HR-MS/MS	ENSG00000163736
spinal cord injury	T9	balloon compression	3d	10116	Wistar	spinal cord;parenchyma	C-C motif chemokine 3	P50229	UniProt	24860426	upregulated	proteomics	NanoLC-HR-MS/MS	ENSG00000277796
spinal cord injury	T9	balloon compression	3d	10116	Wistar	spinal cord;parenchyma	C-C motif chemokine	Q5I0L5	UniProt	24860426	upregulated	proteomics	NanoLC-HR-MS/MS	ENSG00000102962
spinal cord injury	T9	balloon compression	3d	10116	Wistar	spinal cord;parenchyma	Protein Clcf1	F7EKG3	UniProt	24860426	upregulated	proteomics	NanoLC-HR-MS/MS	ENSG00000175505
spinal cord injury	T9	balloon compression	3d	10116	Wistar	spinal cord;parenchyma	C-type lectin domain family 11 member A	O88201	UniProt	24860426	upregulated	proteomics	NanoLC-HR-MS/MS	ENSG00000105472
spinal cord injury	T9	balloon compression	3d	10116	Wistar	spinal cord;parenchyma	Galectin-1	P11762	UniProt	24860426	upregulated	proteomics	NanoLC-HR-MS/MS	ENSG00000100097
spinal cord injury	T9	balloon compression	3d	10116	Wistar	spinal cord;parenchyma	Galectin-3	P08699	UniProt	24860426	upregulated	proteomics	NanoLC-HR-MS/MS	ENSG00000131981
spinal cord injury	T9	balloon compression	3d	10116	Wistar	spinal cord;parenchyma	CD9 antigen	P40241	UniProt	24860426	upregulated	proteomics	NanoLC-HR-MS/MS	ENSG00000010278
spinal cord injury	T9	balloon compression	3d	10116	Wistar	spinal cord;parenchyma	Monocyte differentiation antigen CD14	Q63691	UniProt	24860426	upregulated	proteomics	NanoLC-HR-MS/MS	ENSG00000170458
spinal cord injury	T9	balloon compression	3d	10116	Wistar	spinal cord;parenchyma	CD44 antigen	P26051	UniProt	24860426	upregulated	proteomics	NanoLC-HR-MS/MS	ENSG00000026508
spinal cord injury	T9	balloon compression	3d	10116	Wistar	spinal cord;parenchyma	CD59 glycoprotein	P27274	UniProt	24860426	upregulated	proteomics	NanoLC-HR-MS/MS	ENSG00000085063
spinal cord injury	T9	balloon compression	3d	10116	Wistar	spinal cord;parenchyma	Tetraspanin	Q6P9V1	UniProt	24860426	upregulated	proteomics	NanoLC-HR-MS/MS	ENSG00000110651
spinal cord injury	T9	balloon compression	3d	10116	Wistar	spinal cord;parenchyma	CD82 antigen	O70352	UniProt	24860426	upregulated	proteomics	NanoLC-HR-MS/MS	ENSG00000085117
spinal cord injury	T9	balloon compression	3d	10116	Wistar	spinal cord;parenchyma	Platelet-derived growth factor receptor alpha	P20786	UniProt	24860426	upregulated	proteomics	NanoLC-HR-MS/MS	ENSG00000134853
spinal cord injury	T9	balloon compression	3d	10116	Wistar	spinal cord;parenchyma	Complement C1q subcomponent subunit A	P31720	UniProt	24860426	upregulated	proteomics	NanoLC-HR-MS/MS	ENSG00000173372
spinal cord injury	T9	balloon compression	3d	10116	Wistar	spinal cord;parenchyma	Complement C1q subcomponent subunit B	P31721	UniProt	24860426	upregulated	proteomics	NanoLC-HR-MS/MS	ENSG00000173369
spinal cord injury	T9	balloon compression	3d	10116	Wistar	spinal cord;parenchyma	Complement C1q subcomponent subunit C	P31722	UniProt	24860426	upregulated	proteomics	NanoLC-HR-MS/MS	ENSG00000159189
spinal cord injury	T9	balloon compression	3d	10116	Wistar	spinal cord;parenchyma	Complement C3	P01026	UniProt	24860426	upregulated	proteomics	NanoLC-HR-MS/MS	ENSG00000125730
spinal cord injury	T9	balloon compression	3d	10116	Wistar	spinal cord;parenchyma	Complement factor D	P32038	UniProt	24860426	upregulated	proteomics	NanoLC-HR-MS/MS	ENSG00000197766
spinal cord injury	T9	balloon compression	3d	10116	Wistar	spinal cord;parenchyma	Complement factor I	Q9WUW3	UniProt	24860426	upregulated	proteomics	NanoLC-HR-MS/MS	ENSG00000205403
spinal cord injury	T9	balloon compression	3d	10116	Wistar	spinal cord;parenchyma	Neuromodulin	P07936	UniProt	24860426	upregulated	proteomics	NanoLC-HR-MS/MS	ENSG00000172020
spinal cord injury	T9	balloon compression	3d	10116	Wistar	spinal cord;parenchyma	Connective tissue growth factor	Q9R1E9	UniProt	24860426	upregulated	proteomics	NanoLC-HR-MS/MS	ENSG00000118523
spinal cord injury	T9	balloon compression	3d	10116	Wistar	spinal cord;parenchyma	Protein NOV homolog	Q9QZQ5	UniProt	24860426	upregulated	proteomics	NanoLC-HR-MS/MS	ENSG00000136999
spinal cord injury	T9	balloon compression	3d	10116	Wistar	spinal cord;parenchyma	Placenta growth factor	Q63434	UniProt	24860426	upregulated	proteomics	NanoLC-HR-MS/MS	ENSG00000119630
spinal cord injury	T9	balloon compression	3d	10116	Wistar	spinal cord;parenchyma	Macrophage stimulating 1 (Hepatocyte growth factor-like)	P70521	UniProt	24860426	upregulated	proteomics	NanoLC-HR-MS/MS	ENSG00000173531
spinal cord injury	T9	balloon compression	3d	10116	Wistar	spinal cord;parenchyma	Lactadherin	P70490	UniProt	24860426	upregulated	proteomics	NanoLC-HR-MS/MS	ENSG00000140545
spinal cord injury	T9	balloon compression	3d	10116	Wistar	spinal cord;parenchyma	Pdgf protein	Q05028	UniProt	24860426	upregulated	proteomics	NanoLC-HR-MS/MS	ENSG00000100311
spinal cord injury	T9	balloon compression	3d	10116	Wistar	spinal cord;parenchyma	Vascular endothelial growth factor D	O35251	UniProt	24860426	upregulated	proteomics	NanoLC-HR-MS/MS	ENSG00000165197
spinal cord injury	T9	balloon compression	3d	10116	Wistar	spinal cord;parenchyma	Neurofascin	P97685	UniProt	24860426	upregulated	proteomics	NanoLC-HR-MS/MS	ENSG00000163531
spinal cord injury	T9	balloon compression	3d	10116	Wistar	spinal cord;parenchyma	Transforming growth factor beta-1	P17246	UniProt	24860426	upregulated	proteomics	NanoLC-HR-MS/MS	ENSG00000105329
spinal cord injury	T9	balloon compression	3d	10116	Wistar	spinal cord;parenchyma	Transforming growth factor beta-2	Q07257	UniProt	24860426	upregulated	proteomics	NanoLC-HR-MS/MS	ENSG00000092969
spinal cord injury	T9	balloon compression	3d	10116	Wistar	spinal cord;parenchyma	Transforming growth factor beta-3	Q07258	UniProt	24860426	upregulated	proteomics	NanoLC-HR-MS/MS	ENSG00000119699
spinal cord injury	T9	balloon compression	3d	10116	Wistar	spinal cord;parenchyma	Fibroblast growth factor 1	P61149	UniProt	24860426	upregulated	proteomics	NanoLC-HR-MS/MS	ENSG00000113578
spinal cord injury	T9	balloon compression	3d	10116	Wistar	spinal cord;parenchyma	Bone morphogenetic protein 3	P49002	UniProt	24860426	upregulated	proteomics	NanoLC-HR-MS/MS	ENSG00000152785
spinal cord injury	T9	balloon compression	3d	10116	Wistar	spinal cord;parenchyma	Bone morphogenetic protein 2	P49001	UniProt	24860426	upregulated	proteomics	NanoLC-HR-MS/MS	ENSG00000125845
spinal cord injury	T9	balloon compression	3d	10116	Wistar	spinal cord;parenchyma	Pleiotrophin	P63090	UniProt	24860426	upregulated	proteomics	NanoLC-HR-MS/MS	ENSG00000105894
spinal cord injury	T9	balloon compression	3d	10116	Wistar	spinal cord;parenchyma	Hepatocyte growth factor-regulated tyrosine kinase substrate	Q9JJ50	UniProt	24860426	upregulated	proteomics	NanoLC-HR-MS/MS	ENSG00000185359
spinal cord injury	T9	balloon compression	3d	10116	Wistar	spinal cord;parenchyma	Neurotrimin	Q62718	UniProt	24860426	upregulated	proteomics	NanoLC-HR-MS/MS	ENSG00000182667
spinal cord injury	T9	balloon compression	3d	10116	Wistar	spinal cord;parenchyma	Proenkephalin-A	P04094	UniProt	24860426	upregulated	proteomics	NanoLC-HR-MS/MS	ENSG00000181195
spinal cord injury	T9	balloon compression	3d	10116	Wistar	spinal cord;parenchyma	Neuropeptide W	Q8N729	UniProt	24860426	upregulated	proteomics	NanoLC-HR-MS/MS	ENSG00000183971
spinal cord injury	T9	balloon compression	3d	10116	Wistar	spinal cord;parenchyma	Cysteine and glycine-rich protein 1	P47875	UniProt	24860426	upregulated	proteomics	NanoLC-HR-MS/MS	ENSG00000159176
spinal cord injury	T9	balloon compression	3d	10116	Wistar	spinal cord;parenchyma	Cysteine-rich protein 2	P36201	UniProt	24860426	upregulated	proteomics	NanoLC-HR-MS/MS	ENSG00000182809
spinal cord injury	T9	balloon compression	3d	10116	Wistar	spinal cord;parenchyma	Dihydropyrimidinase-related protein 5	Q9JHU0	UniProt	24860426	upregulated	proteomics	NanoLC-HR-MS/MS	ENSG00000157851
spinal cord injury	T9	balloon compression	3d	10116	Wistar	spinal cord;parenchyma	Neuronal growth regulator 1	Q9Z0J8	UniProt	24860426	upregulated	proteomics	NanoLC-HR-MS/MS	ENSG00000172260
spinal cord injury	T9	balloon compression	7d	10116	Wistar	spinal cord;parenchyma	Neuromodulin	P07936	UniProt	24860426	upregulated	proteomics	NanoLC-HR-MS/MS	ENSG00000172020
spinal cord injury	T9	balloon compression	10d	10116	Wistar	spinal cord;parenchyma	Neuromodulin	P07936	UniProt	24860426	upregulated	proteomics	NanoLC-HR-MS/MS	ENSG00000172020
spinal cord injury	T9	balloon compression	7d	10116	Wistar	spinal cord;parenchyma	Connective tissue growth factor	Q9R1E9	UniProt	24860426	upregulated	proteomics	NanoLC-HR-MS/MS	ENSG00000118523
spinal cord injury	T9	balloon compression	7d	10116	Wistar	spinal cord;parenchyma	Neurofascin	P97685	UniProt	24860426	upregulated	proteomics	NanoLC-HR-MS/MS	ENSG00000163531
spinal cord injury	T9	balloon compression	7d	10116	Wistar	spinal cord;parenchyma	Hepatoma-derived growth factor-related protein 3	Q923W4	UniProt	24860426	upregulated	proteomics	NanoLC-HR-MS/MS	ENSG00000166503
spinal cord injury	T9	balloon compression	7d	10116	Wistar	spinal cord;parenchyma	Mesencephalic astrocyte-derived neurotrophic factor	P0C5H9	UniProt	24860426	upregulated	proteomics	NanoLC-HR-MS/MS	ENSG00000145050
spinal cord injury	T9	balloon compression	7d	10116	Wistar	spinal cord;parenchyma	Fibroblast growth factor 1	P61149	UniProt	24860426	upregulated	proteomics	NanoLC-HR-MS/MS	ENSG00000113578
spinal cord injury	T9	balloon compression	7d	10116	Wistar	spinal cord;parenchyma	Osteoclast-stimulating factor 1	Q6P686	UniProt	24860426	upregulated	proteomics	NanoLC-HR-MS/MS	ENSG00000134996
spinal cord injury	T9	balloon compression	10d	10116	Wistar	spinal cord;parenchyma	Osteoclast-stimulating factor 1	Q6P686	UniProt	24860426	upregulated	proteomics	NanoLC-HR-MS/MS	ENSG00000134996
spinal cord injury	T9	balloon compression	7d	10116	Wistar	spinal cord;parenchyma	Synaptosomal-associated protein 25	P60881	UniProt	24860426	upregulated	proteomics	NanoLC-HR-MS/MS	ENSG00000132639
spinal cord injury	T9	balloon compression	10d	10116	Wistar	spinal cord;parenchyma	Synaptosomal-associated protein 25	P60881	UniProt	24860426	upregulated	proteomics	NanoLC-HR-MS/MS	ENSG00000132639
spinal cord injury	T9	balloon compression	3d	10116	Wistar	spinal cord;parenchyma	Protein Syngr3	D4ABK1	UniProt	24860426	upregulated	proteomics	NanoLC-HR-MS/MS	ENSG00000127561
spinal cord injury	T9	balloon compression	3d	10116	Wistar	spinal cord;parenchyma	Synaptonemal complex protein 1	Q03410	UniProt	24860426	upregulated	proteomics	NanoLC-HR-MS/MS	ENSG00000198765
spinal cord injury	T9	balloon compression	10d	10116	Wistar	spinal cord;parenchyma	Synaptonemal complex protein 1	Q03410	UniProt	24860426	upregulated	proteomics	NanoLC-HR-MS/MS	ENSG00000198765
spinal cord injury	T9	balloon compression	3d	10116	Wistar	spinal cord;parenchyma	Synaptojanin-1	Q62910	UniProt	24860426	upregulated	proteomics	NanoLC-HR-MS/MS	ENSG00000159082
spinal cord injury	T9	balloon compression	7d	10116	Wistar	spinal cord;parenchyma	Synaptojanin-1	Q62910	UniProt	24860426	upregulated	proteomics	NanoLC-HR-MS/MS	ENSG00000159082
spinal cord injury	T9	balloon compression	10d	10116	Wistar	spinal cord;parenchyma	Synaptojanin-1	Q62910	UniProt	24860426	upregulated	proteomics	NanoLC-HR-MS/MS	ENSG00000159082
spinal cord injury	T9	balloon compression	3d	10116	Wistar	spinal cord;parenchyma	Synapsin-1	P09951	UniProt	24860426	upregulated	proteomics	NanoLC-HR-MS/MS	ENSG00000008056
spinal cord injury	T9	balloon compression	7d	10116	Wistar	spinal cord;parenchyma	Synapsin-1	P09951	UniProt	24860426	upregulated	proteomics	NanoLC-HR-MS/MS	ENSG00000008056
spinal cord injury	T9	balloon compression	10d	10116	Wistar	spinal cord;parenchyma	Synapsin-1	P09951	UniProt	24860426	upregulated	proteomics	NanoLC-HR-MS/MS	ENSG00000008056
spinal cord injury	T9	balloon compression	7d	10116	Wistar	spinal cord;parenchyma	Synaptotagmin-1	P21707	UniProt	24860426	upregulated	proteomics	NanoLC-HR-MS/MS	ENSG00000067715
spinal cord injury	T9	balloon compression	10d	10116	Wistar	spinal cord;parenchyma	Synaptotagmin-1	P21707	UniProt	24860426	upregulated	proteomics	NanoLC-HR-MS/MS	ENSG00000067715
spinal cord injury	T9	balloon compression	7d	10116	Wistar	spinal cord;parenchyma	Synaptotagmin-2	P29101	UniProt	24860426	upregulated	proteomics	NanoLC-HR-MS/MS	ENSG00000143858
spinal cord injury	T9	balloon compression	10d	10116	Wistar	spinal cord;parenchyma	Synaptotagmin-2	P29101	UniProt	24860426	upregulated	proteomics	NanoLC-HR-MS/MS	ENSG00000143858
spinal cord injury	T9	balloon compression	7d	10116	Wistar	spinal cord;parenchyma	Synaptic vesicle glycoprotein 2A	Q02563	UniProt	24860426	upregulated	proteomics	NanoLC-HR-MS/MS	ENSG00000159164
spinal cord injury	T9	balloon compression	10d	10116	Wistar	spinal cord;parenchyma	Synaptic vesicle glycoprotein 2A	Q02563	UniProt	24860426	upregulated	proteomics	NanoLC-HR-MS/MS	ENSG00000159164
spinal cord injury	T9	balloon compression	7d	10116	Wistar	spinal cord;parenchyma	Synaptophysin	P07825	UniProt	24860426	upregulated	proteomics	NanoLC-HR-MS/MS	ENSG00000102003
spinal cord injury	T9	balloon compression	10d	10116	Wistar	spinal cord;parenchyma	Synaptophysin	P07825	UniProt	24860426	upregulated	proteomics	NanoLC-HR-MS/MS	ENSG00000102003
spinal cord injury	T9	balloon compression	7d	10116	Wistar	spinal cord;parenchyma	Synaptobrevin homolog YKT6	Q5EGY4	UniProt	24860426	upregulated	proteomics	NanoLC-HR-MS/MS	ENSG00000106636
spinal cord injury	T9	balloon compression	10d	10116	Wistar	spinal cord;parenchyma	Synaptobrevin homolog YKT6	Q5EGY4	UniProt	24860426	upregulated	proteomics	NanoLC-HR-MS/MS	ENSG00000106636
spinal cord injury	T9	balloon compression	7d	10116	Wistar	spinal cord;parenchyma	Ras-related protein Rab-3A	P63012	UniProt	24860426	upregulated	proteomics	NanoLC-HR-MS/MS	ENSG00000105649
spinal cord injury	T9	balloon compression	10d	10116	Wistar	spinal cord;parenchyma	Ras-related protein Rab-3A	P63012	UniProt	24860426	upregulated	proteomics	NanoLC-HR-MS/MS	ENSG00000105649
spinal cord injury	T9	balloon compression	7d	10116	Wistar	spinal cord;parenchyma	Protein Rab5b	A1L1J8	UniProt	24860426	upregulated	proteomics	NanoLC-HR-MS/MS	ENSG00000111540
spinal cord injury	T9	balloon compression	10d	10116	Wistar	spinal cord;parenchyma	Protein Rab5b	A1L1J8	UniProt	24860426	upregulated	proteomics	NanoLC-HR-MS/MS	ENSG00000111540
spinal cord injury	T9	balloon compression	7d	10116	Wistar	spinal cord;parenchyma	Ras-related protein Rab-7a	P09527	UniProt	24860426	upregulated	proteomics	NanoLC-HR-MS/MS	ENSG00000075785
spinal cord injury	T9	balloon compression	10d	10116	Wistar	spinal cord;parenchyma	Ras-related protein Rab-7a	P09527	UniProt	24860426	upregulated	proteomics	NanoLC-HR-MS/MS	ENSG00000075785
spinal cord injury	T9	balloon compression	7d	10116	Wistar	spinal cord;parenchyma	Ras-related protein Rab-11B	O35509	UniProt	24860426	upregulated	proteomics	NanoLC-HR-MS/MS	ENSG00000185236
spinal cord injury	T9	balloon compression	10d	10116	Wistar	spinal cord;parenchyma	Ras-related protein Rab-11B	O35509	UniProt	24860426	upregulated	proteomics	NanoLC-HR-MS/MS	ENSG00000185236
spinal cord injury	T9	balloon compression	7d	10116	Wistar	spinal cord;parenchyma	Ras-related protein Rab-21	Q6AXT5	UniProt	24860426	upregulated	proteomics	NanoLC-HR-MS/MS	ENSG00000080371
spinal cord injury	T9	balloon compression	7d	10116	Wistar	spinal cord;parenchyma	Ras-related protein Rab-27B	Q99P74	UniProt	24860426	upregulated	proteomics	NanoLC-HR-MS/MS	ENSG00000041353
spinal cord injury	T9	balloon compression	7d	10116	Wistar	spinal cord;parenchyma	Ras-related protein Rab-31	Q6GQP4	UniProt	24860426	upregulated	proteomics	NanoLC-HR-MS/MS	ENSG00000168461
spinal cord injury	T11	contusion	8hr	10116	Sprague-Dawley	spinal cord;parenchyma	GDP-dissociation inhibitor-2	P50399	UniProt	7315910	upregulated	proteomics	MALDI-TOF/TOF	ENSG00000057608
spinal cord injury	T10	transection	1d	10116	Long-Evans	spinal cord;parenchyma	Transforming protein RhoA	P61589	UniProt	12860969	upregulated	proteomics	immunoblot	ENSG00000067560
spinal cord injury	T10	transection	3d	10116	Long-Evans	spinal cord;parenchyma	Transforming protein RhoA	P61589	UniProt	12860969	upregulated	proteomics	immunoblot	ENSG00000067560
spinal cord injury	T10	transection	7d	10116	Long-Evans	spinal cord;parenchyma	Transforming protein RhoA	P61589	UniProt	12860969	upregulated	proteomics	immunoblot	ENSG00000067560
spinal cord injury	T10	transection	1.5hr	10116	Long-Evans	spinal cord;parenchyma	Transforming protein RhoA	P61589	UniProt	12860969	upregulated	proteomics	immunoblot	ENSG00000067560
spinal cord injury	T9	contusion	6hr	10116	Sprague-Dawley	blood	gamma enolase	P07323	UniProt	15670387	upregulated	proteomics	immunosorbent assay	ENSG00000111674
spinal cord injury	T9	contusion	1d	10116	Sprague-Dawley	blood	gamma enolase	P07323	UniProt	15670387	upregulated	proteomics	immunosorbent assay	ENSG00000111674
spinal cord injury	T9	contusion	6hr	10116	Sprague-Dawley	blood	Protein S100-b	P04631	UniProt	15670387	upregulated	proteomics	immunosorbent assay	ENSG00000160307
spinal cord injury	T9	contusion	2hr	10116	Sprague-Dawley	spinal cord;parenchyma	G1/S-specific cyclin-D3	P48961	UniProt	18008145	upregulated	proteomics	WB	ENSG00000112576
spinal cord injury	T9	contusion	8hr	10116	Sprague-Dawley	spinal cord;parenchyma	G1/S-specific cyclin-D3	P48961	UniProt	18008145	upregulated	proteomics	WB	ENSG00000112576
spinal cord injury	T9	contusion	1d	10116	Sprague-Dawley	spinal cord;parenchyma	G1/S-specific cyclin-D3	P48961	UniProt	18008145	upregulated	proteomics	WB	ENSG00000112576
spinal cord injury	T9	contusion	3d	10116	Sprague-Dawley	spinal cord;parenchyma	G1/S-specific cyclin-D3	P48961	UniProt	18008145	upregulated	proteomics	WB	ENSG00000112576
spinal cord injury	T9	contusion	5d	10116	Sprague-Dawley	spinal cord;parenchyma	G1/S-specific cyclin-D3	P48961	UniProt	18008145	upregulated	proteomics	WB	ENSG00000112576
spinal cord injury	T9	contusion	7d	10116	Sprague-Dawley	spinal cord;parenchyma	G1/S-specific cyclin-D3	P48961	UniProt	18008145	upregulated	proteomics	WB	ENSG00000112576
spinal cord injury	T9	transection	3d	10116	Sprague-Dawley	spinal cord;parenchyma	Dexamethasone-induced Ras-related protein 1	Q9JKF8	UniProt	18219571	upregulated	proteomics	WB	ENSG00000108551
spinal cord injury	T9	transection	5d	10116	Sprague-Dawley	spinal cord;parenchyma	Dexamethasone-induced Ras-related protein 1	Q9JKF8	UniProt	18219571	upregulated	proteomics	WB	ENSG00000108551
spinal cord injury	T9	contusion	3d	10116	Sprague-Dawley	spinal cord;parenchyma	A-kinase anchor protein 12	Q5QD51	UniProt	18307037	upregulated	proteomics	WB	ENSG00000131016
spinal cord injury	T9	contusion	5d	10116	Sprague-Dawley	spinal cord;parenchyma	A-kinase anchor protein 12	Q5QD51	UniProt	18307037	upregulated	proteomics	WB	ENSG00000131016
spinal cord injury	T9	contusion	7d	10116	Sprague-Dawley	spinal cord;parenchyma	A-kinase anchor protein 12	Q5QD51	UniProt	18307037	upregulated	proteomics	WB	ENSG00000131016
spinal cord injury	T9	contusion	14d	10116	Sprague-Dawley	spinal cord;parenchyma	A-kinase anchor protein 12	Q5QD51	UniProt	18307037	upregulated	proteomics	WB	ENSG00000131016
spinal cord injury	T8	contusion	2hr	10116	Sprague-Dawley	spinal cord;blood	gamma enolase	P07323	UniProt	18343116	upregulated	proteomics	WB	ENSG00000111674
spinal cord injury	T8	contusion	6hr	10116	Sprague-Dawley	spinal cord;blood	gamma enolase	P07323	UniProt	18343116	upregulated	proteomics	WB	ENSG00000111674
spinal cord injury	T8	contusion	12hr	10116	Sprague-Dawley	spinal cord;blood	gamma enolase	P07323	UniProt	18343116	upregulated	proteomics	WB	ENSG00000111674
spinal cord injury	T8	contusion	1d	10116	Sprague-Dawley	spinal cord;blood	gamma enolase	P07323	UniProt	18343116	upregulated	proteomics	WB	ENSG00000111674
spinal cord injury	T8	contusion	2hr	10116	Sprague-Dawley	spinal cord;CSF	gamma enolase	P07323	UniProt	18343116	upregulated	proteomics	WB	ENSG00000111674
spinal cord injury	T8	contusion	6hr	10116	Sprague-Dawley	spinal cord;CSF	gamma enolase	P07323	UniProt	18343116	upregulated	proteomics	WB	ENSG00000111674
spinal cord injury	T8	contusion	12hr	10116	Sprague-Dawley	spinal cord;CSF	gamma enolase	P07323	UniProt	18343116	upregulated	proteomics	WB	ENSG00000111674
spinal cord injury	T8	contusion	1d	10116	Sprague-Dawley	spinal cord;CSF	gamma enolase	P07323	UniProt	18343116	upregulated	proteomics	WB	ENSG00000111674
spinal cord injury	T8	contusion	2hr	10116	Sprague-Dawley	spinal cord;blood	Protein S100-b	P04631	UniProt	18343116	upregulated	proteomics	WB	ENSG00000160307
spinal cord injury	T8	contusion	6hr	10116	Sprague-Dawley	spinal cord;blood	Protein S100-b	P04631	UniProt	18343116	upregulated	proteomics	WB	ENSG00000160307
spinal cord injury	T8	contusion	12hr	10116	Sprague-Dawley	spinal cord;blood	Protein S100-b	P04631	UniProt	18343116	upregulated	proteomics	WB	ENSG00000160307
spinal cord injury	T8	contusion	1d	10116	Sprague-Dawley	spinal cord;blood	Protein S100-b	P04631	UniProt	18343116	upregulated	proteomics	WB	ENSG00000160307
spinal cord injury	T8	contusion	2hr	10116	Sprague-Dawley	spinal cord;CSF	Protein S100-b	P04631	UniProt	18343116	upregulated	proteomics	WB	ENSG00000160307
spinal cord injury	T8	contusion	6hr	10116	Sprague-Dawley	spinal cord;CSF	Protein S100-b	P04631	UniProt	18343116	upregulated	proteomics	WB	ENSG00000160307
spinal cord injury	T8	contusion	12hr	10116	Sprague-Dawley	spinal cord;CSF	Protein S100-b	P04631	UniProt	18343116	upregulated	proteomics	WB	ENSG00000160307
spinal cord injury	T8	contusion	1d	10116	Sprague-Dawley	spinal cord;CSF	Protein S100-b	P04631	UniProt	18343116	upregulated	proteomics	WB	ENSG00000160307
spinal cord injury	T8	contusion	14d	10116	Sprague-Dawley	spinal cord;parenchyma	Ciliary neurotrophic factor	P20294	UniProt	18615534	upregulated	proteomics	WB	ENSG00000242689
spinal cord injury	T8	contusion	28d	10116	Sprague-Dawley	spinal cord;parenchyma	Ciliary neurotrophic factor	P20294	UniProt	18615534	upregulated	proteomics	WB	ENSG00000242689
spinal cord injury	T9	contusion	7d	10090	C57Bl/6	spinal cord;parenchyma	Disintegrin and metalloproteinase domain-containing protein 8	Q05910	UniProt	19003792	upregulated	proteomics	immunocytochemistry	ENSG00000151651
spinal cord injury	T9	contusion	14d	10090	C57Bl/6	spinal cord;parenchyma	Disintegrin and metalloproteinase domain-containing protein 8	Q05910	UniProt	19003792	upregulated	proteomics	immunocytochemistry	ENSG00000151651
spinal cord injury	T9	contusion	28d	10090	C57Bl/6	spinal cord;parenchyma	Disintegrin and metalloproteinase domain-containing protein 8	Q05910	UniProt	19003792	upregulated	proteomics	immunocytochemistry	ENSG00000151651
spinal cord injury	T6	clip compression	1d	10090	CD1	spinal cord;parenchyma	Nestin	Q6P5H2	UniProt	19528093	upregulated	proteomics	immunocytochemistry	ENSG00000132688
spinal cord injury	T6	clip compression	3d	10090	CD1	spinal cord;parenchyma	Nestin	Q6P5H2	UniProt	19528093	upregulated	proteomics	immunocytochemistry	ENSG00000132688
spinal cord injury	T6	clip compression	7d	10090	CD1	spinal cord;parenchyma	Nestin	Q6P5H2	UniProt	19528093	upregulated	proteomics	immunocytochemistry	ENSG00000132688
spinal cord injury	T6	clip compression	3d	10090	CD1	spinal cord;parenchyma	Glial fibrillary acidic protein	P03995	UniProt	19528093	upregulated	proteomics	immunocytochemistry	ENSG00000131095
spinal cord injury	T6	clip compression	7d	10090	CD1	spinal cord;parenchyma	Glial fibrillary acidic protein	P03995	UniProt	19528093	upregulated	proteomics	immunocytochemistry	ENSG00000131095
spinal cord injury	T6	clip compression	3d	10090	CD1	spinal cord;parenchyma	Chondroitin sulfate proteoglycan 4	Q8VHY0	UniProt	19528093	upregulated	proteomics	immunocytochemistry	ENSG00000173546
spinal cord injury	T6	clip compression	7d	10090	CD1	spinal cord;parenchyma	Chondroitin sulfate proteoglycan 4	Q8VHY0	UniProt	19528093	upregulated	proteomics	immunocytochemistry	ENSG00000173546
spinal cord injury	T6	clip compression	3d	10090	CD1	spinal cord;parenchyma	Uracil nucleotide/cysteinyl leukotriene receptor	Q6NS65	UniProt	19528093	upregulated	proteomics	immunocytochemistry	ENSG00000144230
spinal cord injury	T6	clip compression	7d	10090	CD1	spinal cord;parenchyma	Uracil nucleotide/cysteinyl leukotriene receptor	Q6NS65	UniProt	19528093	upregulated	proteomics	immunocytochemistry	ENSG00000144230
spinal cord injury	T6	clip compression	1d	10090	CD1	spinal cord;parenchyma	Tubulin beta-3 chain	Q9ERD7	UniProt	19528093	upregulated	proteomics	immunocytochemistry	ENSG00000258947
spinal cord injury	T6	clip compression	3d	10090	CD1	spinal cord;parenchyma	Tubulin beta-3 chain	Q9ERD7	UniProt	19528093	upregulated	proteomics	immunocytochemistry	ENSG00000258947
spinal cord injury	T6	clip compression	7d	10090	CD1	spinal cord;parenchyma	Tubulin beta-3 chain	Q9ERD7	UniProt	19528093	upregulated	proteomics	immunocytochemistry	ENSG00000258947
spinal cord injury	C2	hemisection	7d	10116	Sprague-Dawley	spinal cord;parenchyma	Actin, cytoplasmic 1	P60711	UniProt	19559075	upregulated	proteomics	WB	ENSG00000075624
spinal cord injury	C2	hemisection	7d	10116	Sprague-Dawley	spinal cord;parenchyma	Neuromodulin	P07936	UniProt	19559075	downregulated	proteomics	WB	ENSG00000172020
spinal cord injury	T9	contusion	1d	10116	Sprague-Dawley	spinal cord;parenchyma	E3 ubiquitin-protein ligase RNF123	D3ZXK7	UniProt	21229311	upregulated	proteomics	WB	ENSG00000164068
spinal cord injury	T9	contusion	2d	10116	Sprague-Dawley	spinal cord;parenchyma	E3 ubiquitin-protein ligase RNF123	D3ZXK7	UniProt	21229311	upregulated	proteomics	WB	ENSG00000164068
spinal cord injury	T9	contusion	4d	10116	Sprague-Dawley	spinal cord;parenchyma	E3 ubiquitin-protein ligase RNF123	D3ZXK7	UniProt	21229311	upregulated	proteomics	WB	ENSG00000164068
spinal cord injury	T9	contusion	1d	10116	Sprague-Dawley	spinal cord;parenchyma	Cyclin dependent kinase inhibitor	O08769	UniProt	21229311	downregulated	proteomics	WB	ENSG00000111276
spinal cord injury	T9	contusion	2d	10116	Sprague-Dawley	spinal cord;parenchyma	Cyclin dependent kinase inhibitor	O08769	UniProt	21229311	downregulated	proteomics	WB	ENSG00000111276
spinal cord injury	T9	contusion	4d	10116	Sprague-Dawley	spinal cord;parenchyma	Cyclin dependent kinase inhibitor	O08769	UniProt	21229311	downregulated	proteomics	WB	ENSG00000111276
spinal cord injury	T9	contusion	7d	10116	Sprague-Dawley	spinal cord;parenchyma	Cyclin dependent kinase inhibitor	O08769	UniProt	21229311	downregulated	proteomics	WB	ENSG00000111276
spinal cord injury	T10	contusion	3d	10090	C57BL/6J	spinal cord;parenchyma	Microtubule-associated proteins 1A/1B light chain 3B	Q9CQV6	UniProt	21304420	downregulated	proteomics	WB	ENSG00000140941
spinal cord injury	T9	contusion	8hr	10116	Sprague-Dawley	spinal cord;parenchyma	E3 ubiquitin-protein ligase SIAH1A	Q920M9	UniProt	21336655	upregulated	proteomics	WB	ENSG00000196470
spinal cord injury	T9	contusion	1d	10116	Sprague-Dawley	spinal cord;parenchyma	E3 ubiquitin-protein ligase SIAH1A	Q920M9	UniProt	21336655	upregulated	proteomics	WB	ENSG00000196470
spinal cord injury	T9	contusion	3d	10116	Sprague-Dawley	spinal cord;parenchyma	E3 ubiquitin-protein ligase SIAH1A	Q920M9	UniProt	21336655	upregulated	proteomics	WB	ENSG00000196470
spinal cord injury	T9	contusion	8hr	10116	Sprague-Dawley	spinal cord;parenchyma	Caspase-3	P55213	UniProt	21336655	upregulated	proteomics	WB	ENSG00000164305
spinal cord injury	T9	contusion	1d	10116	Sprague-Dawley	spinal cord;parenchyma	Caspase-3	P55213	UniProt	21336655	upregulated	proteomics	WB	ENSG00000164305
spinal cord injury	T9	contusion	3d	10116	Sprague-Dawley	spinal cord;parenchyma	Caspase-3	P55213	UniProt	21336655	upregulated	proteomics	WB	ENSG00000164305
spinal cord injury	T9	contusion	5d	10116	Sprague-Dawley	spinal cord;parenchyma	Caspase-3	P55213	UniProt	21336655	upregulated	proteomics	WB	ENSG00000164305
spinal cord injury	T9	contusion	7d	10116	Sprague-Dawley	spinal cord;parenchyma	Caspase-3	P55213	UniProt	21336655	upregulated	proteomics	WB	ENSG00000164305
spinal cord injury	T9	contusion	14d	10116	Sprague-Dawley	spinal cord;parenchyma	Caspase-3	P55213	UniProt	21336655	upregulated	proteomics	WB	ENSG00000164305
spinal cord injury	T9	contusion	1d	10116	Sprague-Dawley	spinal cord;parenchyma	Cyclin-H	Q9R1A0	UniProt	21710280	upregulated	proteomics	WB	ENSG00000134480
spinal cord injury	T9	contusion	3d	10116	Sprague-Dawley	spinal cord;parenchyma	Cyclin-H	Q9R1A0	UniProt	21710280	upregulated	proteomics	WB	ENSG00000134480
spinal cord injury	T9	contusion	5d	10116	Sprague-Dawley	spinal cord;parenchyma	Cyclin-H	Q9R1A0	UniProt	21710280	upregulated	proteomics	WB	ENSG00000134480
spinal cord injury	T10	contusion	2hr	10116	Sprague-Dawley	spinal cord;parenchyma	Interleukin-1 alpha	P16598	UniProt	22420033	upregulated	proteomics	microarray	ENSG00000115008
spinal cord injury	T10	contusion	4hr	10116	Sprague-Dawley	spinal cord;parenchyma	Interleukin-1 alpha	P16598	UniProt	22420033	upregulated	proteomics	microarray	ENSG00000115008
spinal cord injury	T10	contusion	6hr	10116	Sprague-Dawley	spinal cord;parenchyma	Interleukin-1 alpha	P16598	UniProt	22420033	upregulated	proteomics	microarray	ENSG00000115008
spinal cord injury	T10	contusion	1d	10116	Sprague-Dawley	spinal cord;parenchyma	Interleukin-1 alpha	P16598	UniProt	22420033	upregulated	proteomics	microarray	ENSG00000115008
spinal cord injury	T10	contusion	2hr	10116	Sprague-Dawley	spinal cord;parenchyma	Interleukin-1 beta	Q63264	UniProt	22420033	upregulated	proteomics	microarray	ENSG00000125538
spinal cord injury	T10	contusion	4hr	10116	Sprague-Dawley	spinal cord;parenchyma	Interleukin-1 beta	Q63264	UniProt	22420033	upregulated	proteomics	microarray	ENSG00000125538
spinal cord injury	T10	contusion	6hr	10116	Sprague-Dawley	spinal cord;parenchyma	Interleukin-1 beta	Q63264	UniProt	22420033	upregulated	proteomics	microarray	ENSG00000125538
spinal cord injury	T10	contusion	1d	10116	Sprague-Dawley	spinal cord;parenchyma	Interleukin-1 beta	Q63264	UniProt	22420033	upregulated	proteomics	microarray	ENSG00000125538
spinal cord injury	T10	contusion	2hr	10116	Sprague-Dawley	spinal cord;parenchyma	Interleukin-6	P20607	UniProt	22420033	upregulated	proteomics	microarray	ENSG00000136244
spinal cord injury	T10	contusion	4hr	10116	Sprague-Dawley	spinal cord;parenchyma	Interleukin-6	P20607	UniProt	22420033	upregulated	proteomics	microarray	ENSG00000136244
spinal cord injury	T10	contusion	6hr	10116	Sprague-Dawley	spinal cord;parenchyma	Interleukin-6	P20607	UniProt	22420033	upregulated	proteomics	microarray	ENSG00000136244
spinal cord injury	T10	contusion	2hr	10116	Sprague-Dawley	spinal cord;parenchyma	Tumor necrosis factor	P16599	UniProt	22420033	upregulated	proteomics	microarray	ENSG00000204490
spinal cord injury	T10	contusion	4hr	10116	Sprague-Dawley	spinal cord;parenchyma	Interleukin-13	P42203	UniProt	22420033	upregulated	proteomics	microarray	ENSG00000169194
spinal cord injury	T10	contusion	4hr	10116	Sprague-Dawley	spinal cord;parenchyma	Interleukin-12 subunit alpha	Q9R103	UniProt	22420033	upregulated	proteomics	microarray	ENSG00000168811
spinal cord injury	T10	contusion	4hr	10116	Sprague-Dawley	spinal cord;parenchyma	C-C motif chemokine 5	P50231	UniProt	22420033	upregulated	proteomics	microarray	ENSG00000271503
spinal cord injury	T10	contusion	1d	10116	Sprague-Dawley	spinal cord;parenchyma	Nuclear factor NF-kappa-B p105 subunit	Q63369	UniProt	22675554	upregulated	proteomics	WB	ENSG00000109320
spinal cord injury	T10	contusion	1d	10116	Sprague-Dawley	spinal cord;parenchyma	Mitogen-activated protein kinase 1	P63086	UniProt	22675554	upregulated	proteomics	WB	ENSG00000100030
spinal cord injury	T10	contusion	1d	10116	Sprague-Dawley	spinal cord;parenchyma	Apoptosis regulator Bcl-2	P49950	UniProt	22675554	upregulated	proteomics	WB	ENSG00000171791
spinal cord injury	T10	contusion	3d	10116	Sprague-Dawley	spinal cord;parenchyma	Apoptosis regulator Bcl-2	P49950	UniProt	22675554	upregulated	proteomics	WB	ENSG00000171791
spinal cord injury	T10	contusion	1d	10116	Sprague-Dawley	spinal cord;parenchyma	Caspase-3	P55213	UniProt	22675554	downregulated	proteomics	WB	ENSG00000164305
spinal cord injury	T10	contusion	3d	10116	Sprague-Dawley	spinal cord;parenchyma	Caspase-3	P55213	UniProt	22675554	downregulated	proteomics	WB	ENSG00000164305
spinal cord injury	T10	contusion	7d	10116	Sprague-Dawley	spinal cord;parenchyma	Caspase-3	P55213	UniProt	22675554	downregulated	proteomics	WB	ENSG00000164305
spinal cord injury	T9	contusion	6hr	10116	Sprague-Dawley	spinal cord;parenchyma	Myelin and lymphocyte protein	Q64349	UniProt	23196718	upregulated	proteomics	WB	ENSG00000172005
spinal cord injury	T9	contusion	12hr	10116	Sprague-Dawley	spinal cord;parenchyma	Myelin and lymphocyte protein	Q64349	UniProt	23196718	upregulated	proteomics	WB	ENSG00000172005
spinal cord injury	T9	contusion	1d	10116	Sprague-Dawley	spinal cord;parenchyma	Myelin and lymphocyte protein	Q64349	UniProt	23196718	upregulated	proteomics	WB	ENSG00000172005
spinal cord injury	T9	contusion	3d	10116	Sprague-Dawley	spinal cord;parenchyma	Myelin and lymphocyte protein	Q64349	UniProt	23196718	upregulated	proteomics	WB	ENSG00000172005
spinal cord injury	T9	contusion	6hr	10116	Sprague-Dawley	spinal cord;parenchyma	Caspase-3	P55213	UniProt	23196718	upregulated	proteomics	WB	ENSG00000164305
spinal cord injury	T9	contusion	12hr	10116	Sprague-Dawley	spinal cord;parenchyma	Caspase-3	P55213	UniProt	23196718	upregulated	proteomics	WB	ENSG00000164305
spinal cord injury	T9	contusion	1d	10116	Sprague-Dawley	spinal cord;parenchyma	Caspase-3	P55213	UniProt	23196718	upregulated	proteomics	WB	ENSG00000164305
spinal cord injury	T9	contusion	3d	10116	Sprague-Dawley	spinal cord;parenchyma	Caspase-3	P55213	UniProt	23196718	upregulated	proteomics	WB	ENSG00000164305
spinal cord injury	T9	contusion	5d	10116	Sprague-Dawley	spinal cord;parenchyma	Caspase-3	P55213	UniProt	23196718	upregulated	proteomics	WB	ENSG00000164305
spinal cord injury	T9	contusion	7d	10116	Sprague-Dawley	spinal cord;parenchyma	Caspase-3	P55213	UniProt	23196718	upregulated	proteomics	WB	ENSG00000164305
spinal cord injury	T9	contusion	6hr	10116	Sprague-Dawley	spinal cord;parenchyma	Caspase-3	P55213	UniProt	23595775	upregulated	proteomics	WB	ENSG00000164305
spinal cord injury	T9	contusion	12hr	10116	Sprague-Dawley	spinal cord;parenchyma	Caspase-3	P55213	UniProt	23595775	upregulated	proteomics	WB	ENSG00000164305
spinal cord injury	T9	contusion	1d	10116	Sprague-Dawley	spinal cord;parenchyma	Caspase-3	P55213	UniProt	23595775	upregulated	proteomics	WB	ENSG00000164305
spinal cord injury	T9	contusion	3d	10116	Sprague-Dawley	spinal cord;parenchyma	Caspase-3	P55213	UniProt	23595775	upregulated	proteomics	WB	ENSG00000164305
spinal cord injury	T9	contusion	5d	10116	Sprague-Dawley	spinal cord;parenchyma	Caspase-3	P55213	UniProt	23595775	upregulated	proteomics	WB	ENSG00000164305
spinal cord injury	T9	contusion	7d	10116	Sprague-Dawley	spinal cord;parenchyma	Caspase-3	P55213	UniProt	23595775	upregulated	proteomics	WB	ENSG00000164305
spinal cord injury	T9	contusion	14d	10116	Sprague-Dawley	spinal cord;parenchyma	Caspase-3	P55213	UniProt	23595775	upregulated	proteomics	WB	ENSG00000164305
spinal cord injury	lumbar	aorta occlusion	2d	10116	Sprague-Dawley	spinal cord;blood	Interleukin-1 beta	Q63264	UniProt	24485778	upregulated	proteomics	ELISA	ENSG00000125538
spinal cord injury	lumbar	aorta occlusion	2d	10116	Sprague-Dawley	spinal cord;blood	Tumor necrosis factor	P16599	UniProt	24485778	upregulated	proteomics	ELISA	ENSG00000204490
spinal cord injury	lumbar	aorta occlusion	2d	10116	Sprague-Dawley	spinal cord;blood	Interleukin-6	P20607	UniProt	24485778	upregulated	proteomics	ELISA	ENSG00000136244
spinal cord injury	any	contusion	7d	9606	human	spinal cord;CSF	Neurofilament light polypeptide	P07196	UniProt	24935984	upregulated	proteomics	immunoassay	ENSG00000277586
spinal cord injury	T9	contusion	6hr	10116	Sprague-Dawley	spinal cord;parenchyma	Small glutamine-rich tetratricopeptide repeat-containing protein alpha	O70593	UniProt	25030242	upregulated	proteomics	WB	ENSG00000104969
spinal cord injury	T9	contusion	12hr	10116	Sprague-Dawley	spinal cord;parenchyma	Small glutamine-rich tetratricopeptide repeat-containing protein alpha	O70593	UniProt	25030242	upregulated	proteomics	WB	ENSG00000104969
spinal cord injury	T9	contusion	1d	10116	Sprague-Dawley	spinal cord;parenchyma	Small glutamine-rich tetratricopeptide repeat-containing protein alpha	O70593	UniProt	25030242	upregulated	proteomics	WB	ENSG00000104969
spinal cord injury	T9	contusion	3d	10116	Sprague-Dawley	spinal cord;parenchyma	Small glutamine-rich tetratricopeptide repeat-containing protein alpha	O70593	UniProt	25030242	upregulated	proteomics	WB	ENSG00000104969
spinal cord injury	T9	contusion	5d	10116	Sprague-Dawley	spinal cord;parenchyma	Small glutamine-rich tetratricopeptide repeat-containing protein alpha	O70593	UniProt	25030242	upregulated	proteomics	WB	ENSG00000104969
spinal cord injury	T9	contusion	7d	10116	Sprague-Dawley	spinal cord;parenchyma	Small glutamine-rich tetratricopeptide repeat-containing protein alpha	O70593	UniProt	25030242	upregulated	proteomics	WB	ENSG00000104969
spinal cord injury	T9	contusion	12hr	10116	Sprague-Dawley	spinal cord;parenchyma	Proliferating cell nuclear antigen	P04961	UniProt	25030242	upregulated	proteomics	WB	ENSG00000132646
spinal cord injury	T9	contusion	1d	10116	Sprague-Dawley	spinal cord;parenchyma	Proliferating cell nuclear antigen	P04961	UniProt	25030242	upregulated	proteomics	WB	ENSG00000132646
spinal cord injury	T9	contusion	3d	10116	Sprague-Dawley	spinal cord;parenchyma	Proliferating cell nuclear antigen	P04961	UniProt	25030242	upregulated	proteomics	WB	ENSG00000132646
spinal cord injury	T9	contusion	5d	10116	Sprague-Dawley	spinal cord;parenchyma	Proliferating cell nuclear antigen	P04961	UniProt	25030242	upregulated	proteomics	WB	ENSG00000132646
spinal cord injury	T9	contusion	7d	10116	Sprague-Dawley	spinal cord;parenchyma	Proliferating cell nuclear antigen	P04961	UniProt	25030242	upregulated	proteomics	WB	ENSG00000132646
spinal cord injury	T9	contusion	12hr	10116	Sprague-Dawley	spinal cord;parenchyma	Caspase-3	P55213	UniProt	25030242	upregulated	proteomics	WB	ENSG00000164305
spinal cord injury	T9	contusion	1d	10116	Sprague-Dawley	spinal cord;parenchyma	Caspase-3	P55213	UniProt	25030242	upregulated	proteomics	WB	ENSG00000164305
spinal cord injury	T9	contusion	3d	10116	Sprague-Dawley	spinal cord;parenchyma	Caspase-3	P55213	UniProt	25030242	upregulated	proteomics	WB	ENSG00000164305
spinal cord injury	T9	contusion	5d	10116	Sprague-Dawley	spinal cord;parenchyma	Caspase-3	P55213	UniProt	25030242	upregulated	proteomics	WB	ENSG00000164305
spinal cord injury	T9	contusion	7d	10116	Sprague-Dawley	spinal cord;parenchyma	Caspase-3	P55213	UniProt	25030242	upregulated	proteomics	WB	ENSG00000164305
spinal cord injury	T9	contusion	3d	10116	Sprague-Dawley	spinal cord;parenchyma	Cyclin-A1	Q6AY13	UniProt	25030242	upregulated	proteomics	WB	ENSG00000133101
spinal cord injury	T9	contusion	5d	10116	Sprague-Dawley	spinal cord;parenchyma	Cyclin-A1	Q6AY13	UniProt	25030242	upregulated	proteomics	WB	ENSG00000133101
spinal cord injury	T9	contusion	7d	10116	Sprague-Dawley	spinal cord;parenchyma	Cyclin-A1	Q6AY13	UniProt	25030242	upregulated	proteomics	WB	ENSG00000133101
spinal cord injury	T9	contusion	12hr	10116	Sprague-Dawley	spinal cord;parenchyma	Cyclin-A1	Q6AY13	UniProt	25030242	upregulated	proteomics	WB	ENSG00000133101
spinal cord injury	T9	contusion	1d	10116	Sprague-Dawley	spinal cord;parenchyma	G1/S-specific cyclin-D1	P39948	UniProt	25030242	upregulated	proteomics	WB	ENSG00000110092
spinal cord injury	T9	contusion	3d	10116	Sprague-Dawley	spinal cord;parenchyma	G1/S-specific cyclin-D1	P39948	UniProt	25030242	upregulated	proteomics	WB	ENSG00000110092
spinal cord injury	T9	contusion	5d	10116	Sprague-Dawley	spinal cord;parenchyma	G1/S-specific cyclin-D1	P39948	UniProt	25030242	upregulated	proteomics	WB	ENSG00000110092
spinal cord injury	T9	contusion	7d	10116	Sprague-Dawley	spinal cord;parenchyma	G1/S-specific cyclin-D1	P39948	UniProt	25030242	upregulated	proteomics	WB	ENSG00000110092
spinal cord injury	T9	contusion	1d	10116	Sprague-Dawley	spinal cord;parenchyma	Proliferating cell nuclear antigen	P04961	UniProt	25073870	upregulated	proteomics	WB	ENSG00000132646
spinal cord injury	T9	contusion	3d	10116	Sprague-Dawley	spinal cord;parenchyma	Proliferating cell nuclear antigen	P04961	UniProt	25073870	upregulated	proteomics	WB	ENSG00000132646
spinal cord injury	T9	contusion	5d	10116	Sprague-Dawley	spinal cord;parenchyma	Proliferating cell nuclear antigen	P04961	UniProt	25073870	upregulated	proteomics	WB	ENSG00000132646
spinal cord injury	T9	contusion	7d	10116	Sprague-Dawley	spinal cord;parenchyma	Proliferating cell nuclear antigen	P04961	UniProt	25073870	upregulated	proteomics	WB	ENSG00000132646
spinal cord injury	T9	contusion	12hr	10116	Sprague-Dawley	spinal cord;parenchyma	Caspase-3	P55213	UniProt	25073870	upregulated	proteomics	WB	ENSG00000164305
spinal cord injury	T9	contusion	1d	10116	Sprague-Dawley	spinal cord;parenchyma	Caspase-3	P55213	UniProt	25073870	upregulated	proteomics	WB	ENSG00000164305
spinal cord injury	T9	contusion	3d	10116	Sprague-Dawley	spinal cord;parenchyma	Caspase-3	P55213	UniProt	25073870	upregulated	proteomics	WB	ENSG00000164305
spinal cord injury	T9	contusion	5d	10116	Sprague-Dawley	spinal cord;parenchyma	Caspase-3	P55213	UniProt	25073870	upregulated	proteomics	WB	ENSG00000164305
spinal cord injury	T9	contusion	7d	10116	Sprague-Dawley	spinal cord;parenchyma	Caspase-3	P55213	UniProt	25073870	upregulated	proteomics	WB	ENSG00000164305
spinal cord injury	T9	contusion	14d	10116	Sprague-Dawley	spinal cord;parenchyma	Caspase-3	P55213	UniProt	25073870	upregulated	proteomics	WB	ENSG00000164305
spinal cord injury	T9	contusion	12hr	10116	Sprague-Dawley	spinal cord;parenchyma	Apoptosis regulator BAX	Q63690	UniProt	25073870	upregulated	proteomics	WB	ENSG00000087088
spinal cord injury	T9	contusion	1d	10116	Sprague-Dawley	spinal cord;parenchyma	Apoptosis regulator BAX	Q63690	UniProt	25073870	upregulated	proteomics	WB	ENSG00000087088
spinal cord injury	T9	contusion	3d	10116	Sprague-Dawley	spinal cord;parenchyma	Apoptosis regulator BAX	Q63690	UniProt	25073870	upregulated	proteomics	WB	ENSG00000087088
spinal cord injury	T9	contusion	5d	10116	Sprague-Dawley	spinal cord;parenchyma	Apoptosis regulator BAX	Q63690	UniProt	25073870	upregulated	proteomics	WB	ENSG00000087088
spinal cord injury	T9	contusion	7d	10116	Sprague-Dawley	spinal cord;parenchyma	Apoptosis regulator BAX	Q63690	UniProt	25073870	upregulated	proteomics	WB	ENSG00000087088
spinal cord injury	T9	contusion	14d	10116	Sprague-Dawley	spinal cord;parenchyma	Apoptosis regulator BAX	Q63690	UniProt	25073870	upregulated	proteomics	WB	ENSG00000087088
spinal cord injury	T9	contusion	12hr	10116	Sprague-Dawley	spinal cord;parenchyma	Apoptosis regulator Bcl-2	P49950	UniProt	25073870	downregulated	proteomics	WB	ENSG00000171791
spinal cord injury	T9	contusion	1d	10116	Sprague-Dawley	spinal cord;parenchyma	Apoptosis regulator Bcl-2	P49950	UniProt	25073870	downregulated	proteomics	WB	ENSG00000171791
spinal cord injury	T9	contusion	3d	10116	Sprague-Dawley	spinal cord;parenchyma	Apoptosis regulator Bcl-2	P49950	UniProt	25073870	downregulated	proteomics	WB	ENSG00000171791
spinal cord injury	T9	contusion	5d	10116	Sprague-Dawley	spinal cord;parenchyma	Apoptosis regulator Bcl-2	P49950	UniProt	25073870	downregulated	proteomics	WB	ENSG00000171791
spinal cord injury	T9	contusion	7d	10116	Sprague-Dawley	spinal cord;parenchyma	Apoptosis regulator Bcl-2	P49950	UniProt	25073870	downregulated	proteomics	WB	ENSG00000171791
spinal cord injury	any	contusion	1d	9606	human	spinal cord;CSF	Glial fibrillary acidic protein	P14136	UniProt	25341992	upregulated	proteomics	ELISA	ENSG00000131095
spinal cord injury	any	contusion	2d	9606	human	spinal cord;CSF	Glial fibrillary acidic protein	P14136	UniProt	25341992	upregulated	proteomics	ELISA	ENSG00000131095
spinal cord injury	any	contusion	3d	9606	human	spinal cord;CSF	Glial fibrillary acidic protein	P14136	UniProt	25341992	upregulated	proteomics	ELISA	ENSG00000131095
spinal cord injury	any	contusion	1d	9606	human	spinal cord;CSF	Neurofilament heavy polypeptide	P12036	UniProt	25341992	upregulated	proteomics	ELISA	ENSG00000100285
spinal cord injury	any	contusion	2d	9606	human	spinal cord;CSF	Neurofilament heavy polypeptide	P12036	UniProt	25341992	upregulated	proteomics	ELISA	ENSG00000100285
spinal cord injury	any	contusion	3d	9606	human	spinal cord;CSF	Neurofilament heavy polypeptide	P12036	UniProt	25341992	upregulated	proteomics	ELISA	ENSG00000100285
spinal cord injury	any	contusion	1d	9606	human	spinal cord;CSF	Gamma-enolase	P09104	UniProt	25341992	upregulated	proteomics	ELISA	ENSG00000111674
spinal cord injury	any	contusion	2d	9606	human	spinal cord;CSF	Gamma-enolase	P09104	UniProt	25341992	upregulated	proteomics	ELISA	ENSG00000111674
spinal cord injury	any	contusion	3d	9606	human	spinal cord;CSF	Gamma-enolase	P09104	UniProt	25341992	upregulated	proteomics	ELISA	ENSG00000111674
spinal cord injury	T9	contusion	6hr	10116	Sprague-Dawley	spinal cord;parenchyma	Interleukin-6	P20607	UniProt	25845398	upregulated	proteomics	ELISA	ENSG00000136244
spinal cord injury	T9	contusion	6hr	10116	Sprague-Dawley	spinal cord;CSF	Protein S100-B	P04631	UniProt	25845398	upregulated	proteomics	WB	ENSG00000160307
spinal cord injury	T10	contusion	46d	10116	Wistar	spinal cord;parenchyma	Nitric oxide synthase, endothelial	Q62600	UniProt	26151839	upregulated	proteomics	WB	ENSG00000164867
spinal cord injury	T10	contusion	46d	10116	Wistar	spinal cord;parenchyma	Apoptosis regulator Bcl-2	P49950	UniProt	26151839	downregulated	proteomics	WB	ENSG00000171791
spinal cord injury	T10	contusion	46d	10116	Wistar	spinal cord;parenchyma	Apoptosis regulator BAX	Q63690	UniProt	26151839	upregulated	proteomics	WB	ENSG00000087088
spinal cord injury	T10	contusion	46d	10116	Wistar	spinal cord;parenchyma	Caspase-3	P55213	UniProt	26151839	upregulated	proteomics	WB	ENSG00000164305
spinal cord injury	T9	contusion	1d	10116	Sprague-Dawley	spinal cord;parenchyma	Translationally-controlled tumor protein	P63029	UniProt	26266488	upregulated	proteomics	WB	ENSG00000133112
spinal cord injury	T9	contusion	3d	10116	Sprague-Dawley	spinal cord;parenchyma	Translationally-controlled tumor protein	P63029	UniProt	26266488	upregulated	proteomics	WB	ENSG00000133112
spinal cord injury	T9	contusion	3d	10116	Sprague-Dawley	spinal cord;parenchyma	Proliferating cell nuclear antigen	P04961	UniProt	26266488	upregulated	proteomics	WB	ENSG00000132646
spinal cord injury	T9	contusion	5d	10116	Sprague-Dawley	spinal cord;parenchyma	Proliferating cell nuclear antigen	P04961	UniProt	26266488	upregulated	proteomics	WB	ENSG00000132646
spinal cord injury	T9	contusion	7d	10116	Sprague-Dawley	spinal cord;parenchyma	Proliferating cell nuclear antigen	P04961	UniProt	26266488	upregulated	proteomics	WB	ENSG00000132646
spinal cord injury	T9	contusion	14d	10116	Sprague-Dawley	spinal cord;parenchyma	Proliferating cell nuclear antigen	P04961	UniProt	26266488	upregulated	proteomics	WB	ENSG00000132646
spinal cord injury	T8	contusion	1hr	10116	Sprague-Dawley	spinal cord;parenchyma	Transcription factor AP-1	P17325	UniProt	11992467	upregulated	gene expression	microarray	ENSG00000177606
spinal cord injury	T8	contusion	1hr	10116	Sprague-Dawley	spinal cord;parenchyma	CCAAT/enhancer-binding protein beta	P21272	UniProt	11992467	upregulated	gene expression	microarray	ENSG00000172216
spinal cord injury	T8	contusion	1hr	10116	Sprague-Dawley	spinal cord;parenchyma	Heat shock protein beta-1	P42930	UniProt	11992467	upregulated	gene expression	microarray	ENSG00000106211
spinal cord injury	T8	contusion	1hr	10116	Sprague-Dawley	spinal cord;parenchyma	Neuronal pentraxin-2	P97738	UniProt	11992467	upregulated	gene expression	microarray	ENSG00000106236
spinal cord injury	T8	contusion	1hr	10116	Sprague-Dawley	spinal cord;parenchyma	Transcription factor HES-1	Q04666	UniProt	11992467	upregulated	gene expression	microarray	ENSG00000114315
spinal cord injury	T8	contusion	1hr	10116	Sprague-Dawley	spinal cord;parenchyma	Signal transducer and activator of transcription 3	P52631	UniProt	11992467	upregulated	gene expression	microarray	ENSG00000168610
spinal cord injury	T8	contusion	1hr	10116	Sprague-Dawley	spinal cord;parenchyma	Mothers against decapentaplegic homolog 1	P97588	UniProt	11992467	upregulated	gene expression	microarray	ENSG00000170365
spinal cord injury	T8	contusion	1hr	10116	Sprague-Dawley	spinal cord;parenchyma	Interferon regulatory factor 1	P23570	UniProt	11992467	upregulated	gene expression	microarray	ENSG00000125347
spinal cord injury	T8	contusion	1hr	10116	Sprague-Dawley	spinal cord;parenchyma	Mothers against decapentaplegic homolog 9	O54835	UniProt	11992467	upregulated	gene expression	microarray	ENSG00000120693
spinal cord injury	T8	contusion	1hr	10116	Sprague-Dawley	spinal cord;parenchyma	Suppressor of cytokine signaling 3	O88583	UniProt	11992467	upregulated	gene expression	microarray	ENSG00000184557
spinal cord injury	T8	contusion	1hr	10116	Sprague-Dawley	spinal cord;parenchyma	Hypoxia-inducible factor 1-alpha	O35800	UniProt	11992467	upregulated	gene expression	microarray	ENSG00000100644
spinal cord injury	T8	contusion	1hr	10116	Sprague-Dawley	spinal cord;parenchyma	Cyclin-L1	Q9R1Q2	UniProt	11992467	upregulated	gene expression	microarray	ENSG00000163660
spinal cord injury	T8	contusion	1hr	10116	Sprague-Dawley	spinal cord;parenchyma	Tyrosine-protein kinase JAK2	Q62689	UniProt	11992467	upregulated	gene expression	microarray	ENSG00000096968
spinal cord injury	T8	contusion	1hr	10116	Sprague-Dawley	spinal cord;parenchyma	Calmodulin	P62161	UniProt	11992467	downregulated	gene expression	microarray	ENSG00000143933
spinal cord injury	T8	contusion	1hr	10116	Sprague-Dawley	spinal cord;parenchyma	Calmodulin	P62161	UniProt	11992467	downregulated	gene expression	microarray	ENSG00000198668
spinal cord injury	T8	contusion	1hr	10116	Sprague-Dawley	spinal cord;parenchyma	Calmodulin	P62161	UniProt	11992467	downregulated	gene expression	microarray	ENSG00000160014
spinal cord injury	T8	contusion	1hr	10116	Sprague-Dawley	spinal cord;parenchyma	Calcium/calmodulin-dependent protein kinase type II subunit delta	P15791	UniProt	11992467	upregulated	gene expression	microarray	ENSG00000145349
spinal cord injury	T8	contusion	1hr	10116	Sprague-Dawley	spinal cord;parenchyma	RAC-alpha serine/threonine-protein kinase	P47196	UniProt	11992467	upregulated	gene expression	microarray	ENSG00000142208
spinal cord injury	T8	contusion	1hr	10116	Sprague-Dawley	spinal cord;parenchyma	Mitogen-activated protein kinase 1	P63086	UniProt	11992467	upregulated	gene expression	microarray	ENSG00000100030
spinal cord injury	T8	contusion	1hr	10116	Sprague-Dawley	spinal cord;parenchyma	cGMP-dependent 3',5'-cyclic phosphodiesterase	Q01062	UniProt	11992467	upregulated	gene expression	microarray	ENSG00000186642
spinal cord injury	T8	contusion	1hr	10116	Sprague-Dawley	spinal cord;parenchyma	Phospholipase D2	P70498	UniProt	11992467	upregulated	gene expression	microarray	ENSG00000129219
spinal cord injury	T8	contusion	1hr	10116	Sprague-Dawley	spinal cord;parenchyma	Interleukin-1 beta	Q63264	UniProt	11992467	upregulated	gene expression	microarray	ENSG00000125538
spinal cord injury	T8	contusion	1hr	10116	Sprague-Dawley	spinal cord;parenchyma	Tumor necrosis factor	P16599	UniProt	11992467	upregulated	gene expression	microarray	ENSG00000204490
spinal cord injury	T8	contusion	1hr	10116	Sprague-Dawley	spinal cord;parenchyma	Disintegrin and metalloproteinase domain-containing protein 17	Q9Z1K9	UniProt	11992467	upregulated	gene expression	microarray	ENSG00000151694
spinal cord injury	T8	contusion	1hr	10116	Sprague-Dawley	spinal cord;parenchyma	Interleukin-6	P20607	UniProt	11992467	upregulated	gene expression	microarray	ENSG00000136244
spinal cord injury	T8	contusion	1hr	10116	Sprague-Dawley	spinal cord;parenchyma	Interleukin-4	P20096	UniProt	11992467	upregulated	gene expression	microarray	ENSG00000113520
spinal cord injury	T8	contusion	1hr	10116	Sprague-Dawley	spinal cord;parenchyma	Interleukin-2 receptor subunit alpha	P26897	UniProt	11992467	upregulated	gene expression	microarray	ENSG00000134460
spinal cord injury	T8	contusion	1hr	10116	Sprague-Dawley	spinal cord;parenchyma	Transforming growth factor beta-1	P17246	UniProt	11992467	upregulated	gene expression	microarray	ENSG00000105329
spinal cord injury	T8	contusion	1hr	10116	Sprague-Dawley	spinal cord;parenchyma	Transforming growth factor beta-3	Q07258	UniProt	11992467	upregulated	gene expression	microarray	ENSG00000119699
spinal cord injury	T8	contusion	1hr	10116	Sprague-Dawley	spinal cord;parenchyma	Fibroblast growth factor receptor 1	Q04589	UniProt	11992467	upregulated	gene expression	microarray	ENSG00000077782
spinal cord injury	T8	contusion	1hr	10116	Sprague-Dawley	spinal cord;parenchyma	Insulin-like growth factor I	P08025	UniProt	11992467	upregulated	gene expression	microarray	ENSG00000017427
spinal cord injury	T8	contusion	1hr	10116	Sprague-Dawley	spinal cord;parenchyma	Insulin-like growth factor 1 receptor	P24062	UniProt	11992467	upregulated	gene expression	microarray	ENSG00000140443
spinal cord injury	T8	contusion	1hr	10116	Sprague-Dawley	spinal cord;parenchyma	Insulin-like growth factor-binding protein 5	P24594	UniProt	11992467	upregulated	gene expression	microarray	ENSG00000115461
spinal cord injury	T8	contusion	1hr	10116	Sprague-Dawley	spinal cord;parenchyma	Vascular endothelial growth factor B	O35485	UniProt	11992467	downregulated	gene expression	microarray	ENSG00000173511
spinal cord injury	T8	contusion	1hr	10116	Sprague-Dawley	spinal cord;parenchyma	Macrophage migration inhibitory factor	P30904	UniProt	11992467	downregulated	gene expression	microarray	ENSG00000240972
spinal cord injury	T8	contusion	1hr	10116	Sprague-Dawley	spinal cord;parenchyma	P-selectin	P98106	UniProt	11992467	upregulated	gene expression	microarray	ENSG00000174175
spinal cord injury	T8	contusion	1hr	10116	Sprague-Dawley	spinal cord;parenchyma	Intercellular adhesion molecule 1	Q00238	UniProt	11992467	upregulated	gene expression	microarray	ENSG00000090339
spinal cord injury	T8	contusion	1hr	10116	Sprague-Dawley	spinal cord;parenchyma	Caspase-1	P43527	UniProt	11992467	upregulated	gene expression	microarray	ENSG00000137752
spinal cord injury	T8	contusion	1hr	10116	Sprague-Dawley	spinal cord;parenchyma	Caspase-6	O35397	UniProt	11992467	upregulated	gene expression	microarray	ENSG00000138794
spinal cord injury	T8	contusion	1hr	10116	Sprague-Dawley	spinal cord;parenchyma	Bcl2-associated agonist of cell death	O35147	UniProt	11992467	upregulated	gene expression	microarray	ENSG00000002330
spinal cord injury	T8	contusion	1hr	10116	Sprague-Dawley	spinal cord;parenchyma	Bcl-2-like protein 11	O88498	UniProt	11992467	downregulated	gene expression	microarray	ENSG00000153094
spinal cord injury	T8	contusion	1hr	10116	Sprague-Dawley	spinal cord;parenchyma	Retinoblastoma-associated protein	P33568	UniProt	11992467	upregulated	gene expression	microarray	ENSG00000139687
spinal cord injury	T8	contusion	1hr	10116	Sprague-Dawley	spinal cord;parenchyma	Alpha-synuclein	P37377	UniProt	11992467	downregulated	gene expression	microarray	ENSG00000145335
spinal cord injury	T8	contusion	1hr	10116	Sprague-Dawley	spinal cord;parenchyma	Superoxide dismutase [Mn], mitochondrial	P07895	UniProt	11992467	upregulated	gene expression	microarray	ENSG00000112096
spinal cord injury	T8	contusion	1hr	10116	Sprague-Dawley	spinal cord;parenchyma	Superoxide dismutase [Cu-Zn]	P07632	UniProt	11992467	downregulated	gene expression	microarray	ENSG00000142168
spinal cord injury	T8	contusion	1hr	10116	Sprague-Dawley	spinal cord;parenchyma	Actin, cytoplasmic 1	P60711	UniProt	11992467	upregulated	gene expression	microarray	ENSG00000075624
spinal cord injury	T8	contusion	1hr	10116	Sprague-Dawley	spinal cord;parenchyma	Contactin-2	P22063	UniProt	11992467	upregulated	gene expression	microarray	ENSG00000184144
spinal cord injury	T8	contusion	1hr	10116	Sprague-Dawley	spinal cord;parenchyma	Vimentin	P31000	UniProt	11992467	upregulated	gene expression	microarray	ENSG00000026025
spinal cord injury	T8	contusion	1hr	10116	Sprague-Dawley	spinal cord;parenchyma	Glial fibrillary acidic protein	P47819	UniProt	11992467	upregulated	gene expression	microarray	ENSG00000131095
spinal cord injury	T8	contusion	1hr	10116	Sprague-Dawley	spinal cord;parenchyma	Glutamate receptor ionotropic, NMDA 2D	Q62645	UniProt	11992467	upregulated	gene expression	microarray	ENSG00000105464
spinal cord injury	T8	contusion	1hr	10116	Sprague-Dawley	spinal cord;parenchyma	Glutamate receptor ionotropic, kainate 2	P42260	UniProt	11992467	upregulated	gene expression	microarray	ENSG00000164418
spinal cord injury	T8	contusion	1hr	10116	Sprague-Dawley	spinal cord;parenchyma	Glutamate receptor 2	P19491	UniProt	11992467	upregulated	gene expression	microarray	ENSG00000120251
spinal cord injury	T8	contusion	1hr	10116	Sprague-Dawley	spinal cord;parenchyma	Muscarinic acetylcholine receptor M3	P08483	UniProt	11992467	upregulated	gene expression	microarray	ENSG00000133019
spinal cord injury	T8	contusion	1hr	10116	Sprague-Dawley	spinal cord;parenchyma	Gamma-aminobutyric acid type B receptor subunit 1	Q9Z0U4	UniProt	11992467	downregulated	gene expression	microarray	ENSG00000204681
spinal cord injury	T8	contusion	1hr	10116	Sprague-Dawley	spinal cord;parenchyma	Translocator protein	P16257	UniProt	11992467	upregulated	gene expression	microarray	ENSG00000100300
spinal cord injury	T8	contusion	1hr	10116	Sprague-Dawley	spinal cord;parenchyma	Gonadotropin-releasing hormone receptor	P30969	UniProt	11992467	upregulated	gene expression	microarray	ENSG00000109163
spinal cord injury	T8	contusion	1hr	10116	Sprague-Dawley	spinal cord;parenchyma	Protachykinin-1	P06767	UniProt	11992467	downregulated	gene expression	microarray	ENSG00000006128
spinal cord injury	T8	contusion	1hr	10116	Sprague-Dawley	spinal cord;parenchyma	Potassium voltage-gated channel subfamily B member 2	Q63099	UniProt	11992467	upregulated	gene expression	microarray	ENSG00000182674
spinal cord injury	T8	contusion	1hr	10116	Sprague-Dawley	spinal cord;parenchyma	Potassium voltage-gated channel subfamily H member 2	O08962	UniProt	11992467	upregulated	gene expression	microarray	ENSG00000055118
spinal cord injury	T8	contusion	1hr	10116	Sprague-Dawley	spinal cord;parenchyma	Voltage-dependent L-type calcium channel subunit alpha-1C	P22002	UniProt	11992467	upregulated	gene expression	microarray	ENSG00000151067
spinal cord injury	T8	contusion	1hr	10116	Sprague-Dawley	spinal cord;parenchyma	Sodium channel protein type 5 subunit alpha	P15389	UniProt	11992467	upregulated	gene expression	microarray	ENSG00000183873
spinal cord injury	T8	contusion	1hr	10116	Sprague-Dawley	spinal cord;parenchyma	Sodium channel subunit beta-1	Q00954	UniProt	11992467	downregulated	gene expression	microarray	ENSG00000105711
spinal cord injury	T8	contusion	1hr	10116	Sprague-Dawley	spinal cord;parenchyma	Synaptotagmin-2	P29101	UniProt	11992467	upregulated	gene expression	microarray	ENSG00000143858
spinal cord injury	T8	contusion	1hr	10116	Sprague-Dawley	spinal cord;parenchyma	Synaptotagmin-6	Q62746	UniProt	11992467	upregulated	gene expression	microarray	ENSG00000134207
spinal cord injury	T8	contusion	1hr	10116	Sprague-Dawley	spinal cord;parenchyma	Synaptosomal-associated protein 25	P60881	UniProt	11992467	downregulated	gene expression	microarray	ENSG00000132639
spinal cord injury	T8	contusion	1hr	10116	Sprague-Dawley	spinal cord;parenchyma	Disks large homolog 4	P31016	UniProt	11992467	upregulated	gene expression	microarray	ENSG00000132535
spinal cord injury	T8	contusion	1hr	10116	Sprague-Dawley	spinal cord;parenchyma	Syntaxin-8	Q9Z2Q7	UniProt	11992467	downregulated	gene expression	microarray	ENSG00000170310
spinal cord injury	T12	contusion	1d	10116	Sprague-Dawley	spinal cord;parenchyma	Heat shock 27-kDa protein	P42930	UniProt	12098653	upregulated	gene expression	microarray	ENSG00000106211
spinal cord injury	T12	contusion	1d	10116	Sprague-Dawley	spinal cord;parenchyma	Tissue inhibitor of metalloproteinase-1	L31883	EMBL	12098653	upregulated	gene expression	microarray	ENSG00000102265
spinal cord injury	T12	contusion	1d	10116	Sprague-Dawley	spinal cord;parenchyma	Epidermal fatty acid-binding protein	U13253	EMBL	12098653	upregulated	gene expression	microarray	ENSG00000164687
spinal cord injury	T12	contusion	1d	10116	Sprague-Dawley	spinal cord;parenchyma	Lecithin:cholesterol acyltransferase	U62803	EMBL	12098653	downregulated	gene expression	microarray	ENSG00000213398
spinal cord injury	T12	contusion	1d	10116	Sprague-Dawley	spinal cord;parenchyma	Dipeptidyl aminopeptidase related protein	M76426	EMBL	12098653	downregulated	gene expression	microarray	ENSG00000130226
spinal cord injury	T12	contusion	1d	10116	Sprague-Dawley	spinal cord;parenchyma	Phospholipase C delta 4	D50455	EMBL	12098653	downregulated	gene expression	microarray	ENSG00000115556
spinal cord injury	T12	contusion	1d	10116	Sprague-Dawley	spinal cord;parenchyma	Plasma membrane Ca2+ ATPase isoform 2	J03754	EMBL	12098653	downregulated	gene expression	microarray	ENSG00000157087
spinal cord injury	T12	contusion	1d	10116	Sprague-Dawley	spinal cord;parenchyma	G-protein G(O) alpha subunit	M17526	EMBL	12098653	downregulated	gene expression	microarray	ENSG00000087258
spinal cord injury	T12	contusion	1d	10116	Sprague-Dawley	spinal cord;parenchyma	GABA transporter 3	M95738	EMBL	12098653	downregulated	gene expression	microarray	ENSG00000132164
spinal cord injury	T12	contusion	1d	10116	Sprague-Dawley	spinal cord;parenchyma	Neuroendocrine protein 7B2	M63901	EMBL	12098653	downregulated	gene expression	microarray	ENSG00000166922
spinal cord injury	T8	contusion	12hr	10116	Long-Evans	spinal cord;parenchyma	CCAAT/enhancer-binding protein beta	P21272	UniProt	15073526	upregulated	gene expression	microarray	ENSG00000172216
spinal cord injury	T8	contusion	12hr	10116	Long-Evans	spinal cord;parenchyma	Early growth response protein 1	P08154	UniProt	15073526	upregulated	gene expression	microarray	ENSG00000120738
spinal cord injury	T8	contusion	12hr	10116	Long-Evans	spinal cord;parenchyma	Heat shock 27-kDa protein-1 beta	P42930	UniProt	15073526	upregulated	gene expression	microarray	ENSG00000106211
spinal cord injury	T8	contusion	12hr	10116	Long-Evans	spinal cord;parenchyma	HO-1/HSP32	J02722	EMBL	15073526	upregulated	gene expression	microarray	ENSG00000100292
spinal cord injury	T8	contusion	12hr	10116	Long-Evans	spinal cord;parenchyma	Interleukin-1 beta	Q63264	UniProt	15073526	upregulated	gene expression	microarray	ENSG00000125538
spinal cord injury	T8	contusion	12hr	10116	Long-Evans	spinal cord;parenchyma	Vimentin	X62952	EMBL	15073526	upregulated	gene expression	microarray	ENSG00000026025
spinal cord injury	T8	contusion	12hr	10116	Long-Evans	spinal cord;parenchyma	NF-L	M25638	EMBL	15073526	downregulated	gene expression	microarray	ENSG00000277586
spinal cord injury	T8	contusion	12hr	10116	Long-Evans	spinal cord;parenchyma	NCKX2	AF021923	EMBL	15073526	downregulated	gene expression	microarray	ENSG00000155886
spinal cord injury	T8	contusion	12hr	10116	Long-Evans	spinal cord;parenchyma	GFAP	AF028784	EMBL	15073526	upregulated	gene expression	microarray	ENSG00000131095
spinal cord injury	T8	contusion	42d	10116	Long-Evans	spinal cord;parenchyma	CCAAT/enhancer-binding protein beta	P21272	UniProt	15073526	upregulated	gene expression	microarray	ENSG00000172216
spinal cord injury	T8	contusion	42d	10116	Long-Evans	spinal cord;parenchyma	Early growth response protein 1	P08154	UniProt	15073526	upregulated	gene expression	microarray	ENSG00000120738
spinal cord injury	T8	contusion	42d	10116	Long-Evans	spinal cord;parenchyma	Heat shock 27-kDa protein-1 beta	P42930	UniProt	15073526	upregulated	gene expression	microarray	ENSG00000106211
spinal cord injury	T8	contusion	42d	10116	Long-Evans	spinal cord;parenchyma	HO-1/HSP32	J02722	EMBL	15073526	upregulated	gene expression	microarray	ENSG00000100292
spinal cord injury	T8	contusion	42d	10116	Long-Evans	spinal cord;parenchyma	Interleukin-1 beta	Q63264	UniProt	15073526	upregulated	gene expression	microarray	ENSG00000125538
spinal cord injury	T8	contusion	42d	10116	Long-Evans	spinal cord;parenchyma	Vimentin	X62952	EMBL	15073526	upregulated	gene expression	microarray	ENSG00000026025
spinal cord injury	T8	contusion	42d	10116	Long-Evans	spinal cord;parenchyma	NF-L	M25638	EMBL	15073526	downregulated	gene expression	microarray	ENSG00000277586
spinal cord injury	T8	contusion	42d	10116	Long-Evans	spinal cord;parenchyma	NCKX2	AF021923	EMBL	15073526	downregulated	gene expression	microarray	ENSG00000155886
spinal cord injury	T8	contusion	42d	10116	Long-Evans	spinal cord;parenchyma	CD48	X13016	EMBL	15073526	upregulated	gene expression	microarray	ENSG00000117091
spinal cord injury	T8	contusion	42d	10116	Long-Evans	spinal cord;parenchyma	VCAM-1	M84488	EMBL	15073526	upregulated	gene expression	microarray	ENSG00000162692
spinal cord injury	T8	contusion	42d	10116	Long-Evans	spinal cord;parenchyma	Na+/K+-Atp1a3	M28648	EMBL	15073526	downregulated	gene expression	microarray	ENSG00000105409
spinal cord injury	T8	contusion	42d	10116	Long-Evans	spinal cord;parenchyma	Syt11	AF000423	EMBL	15073526	downregulated	gene expression	microarray	ENSG00000132718
spinal cord injury	T8	contusion	42d	10116	Long-Evans	spinal cord;parenchyma	Synaptophysin	X06655	EMBL	15073526	downregulated	gene expression	microarray	ENSG00000102003
spinal cord injury	T8	contusion	42d	10116	Long-Evans	spinal cord;parenchyma	Insulin-like growth factor I	P08025	UniProt	15073526	upregulated	gene expression	microarray	ENSG00000017427
spinal cord injury	T8	contusion	42d	10116	Long-Evans	spinal cord;parenchyma	MAG	M22357	EMBL	15073526	downregulated	gene expression	microarray	ENSG00000105695
spinal cord injury	T8	contusion	42d	10116	Long-Evans	spinal cord;parenchyma	Microtubule-associated protein 2	P15146	UniProt	15073526	upregulated	gene expression	microarray	ENSG00000078018
spinal cord injury	T8	contusion	42d	10116	Long-Evans	spinal cord;parenchyma	E3 ubiquitin-protein ligase Praja-2	Q63364	UniProt	15073526	downregulated	gene expression	microarray	ENSG00000198961
spinal cord injury	T8	contusion	42d	10116	Long-Evans	spinal cord;parenchyma	Apolipoprotein E	P02650	UniProt	15073526	upregulated	gene expression	microarray	ENSG00000130203
spinal cord injury	T8	contusion	42d	10116	Long-Evans	spinal cord;parenchyma	Catechol O-methyltransferase	P22734	UniProt	15073526	upregulated	gene expression	microarray	ENSG00000093010
spinal cord injury	T8	contusion	42d	10116	Long-Evans	spinal cord;parenchyma	Cathepsin-K	O35186	UniProt	15073526	upregulated	gene expression	microarray	ENSG00000143387
spinal cord injury	T8	hemisection	14d	10090	C57/BL6	spinal cord;parenchyma	Angiopoietin-1	O08538	UniProt	15352216	upregulated	gene expression	microarray	ENSG00000154188
spinal cord injury	T8	hemisection	14d	10090	C57/BL6	spinal cord;parenchyma	Vascular endothelial growth factor C	P97953	UniProt	15352216	upregulated	gene expression	microarray	ENSG00000150630
spinal cord injury	T8	hemisection	14d	10090	C57/BL6	spinal cord;parenchyma	Vascular endothelial growth factor receptor 1	P35969	UniProt	15352216	upregulated	gene expression	microarray	ENSG00000102755
spinal cord injury	T8	hemisection	14d	10090	C57/BL6	spinal cord;parenchyma	Vascular endothelial growth factor receptor 3	P35917	UniProt	15352216	upregulated	gene expression	microarray	ENSG00000037280
spinal cord injury	T8	hemisection	14d	10090	C57/BL6	spinal cord;parenchyma	Angiopoietin-1 receptor	Q02858	UniProt	15352216	upregulated	gene expression	microarray	ENSG00000120156
spinal cord injury	T8	hemisection	14d	10090	C57/BL6	spinal cord;parenchyma	Proteinase-activated receptor 1	P30558	UniProt	15352216	upregulated	gene expression	microarray	ENSG00000181104
spinal cord injury	T8	hemisection	14d	10090	C57/BL6	spinal cord;parenchyma	Endoglin	Q63961	UniProt	15352216	upregulated	gene expression	microarray	ENSG00000106991
spinal cord injury	T9	contusion	1d	10116	Sprague-Dawley	spinal cord;parenchyma	Neuritin	O08957	UniProt	15522907	upregulated	gene expression	microarray	ENSG00000124785
spinal cord injury	T9	contusion	1d	10116	Sprague-Dawley	spinal cord;parenchyma	Microtubule-associated protein 1A	P34926	UniProt	15522907	upregulated	gene expression	microarray	ENSG00000166963
spinal cord injury	T9	contusion	1d	10116	Sprague-Dawley	spinal cord;parenchyma	Attractin	Q99J86	UniProt	15522907	upregulated	gene expression	microarray	ENSG00000088812
spinal cord injury	T9	contusion	1d	10116	Sprague-Dawley	spinal cord;parenchyma	Myelin-oligodendrocyte glycoprotein	Q63345	UniProt	15522907	upregulated	gene expression	microarray	ENSG00000137345
spinal cord injury	T9	contusion	42d	10116	Long-Evans	spinal cord;parenchyma	Early growth response protein 1	P08154	UniProt	16517380	upregulated	gene expression	microarray	ENSG00000120738
spinal cord injury	T9	contusion	42d	10116	Long-Evans	spinal cord;parenchyma	CD48	X13016	EMBL	16517380	upregulated	gene expression	microarray	ENSG00000117091
spinal cord injury	T9	contusion	42d	10116	Long-Evans	spinal cord;parenchyma	VCAM-1	M84488	EMBL	16517380	upregulated	gene expression	microarray	ENSG00000162692
spinal cord injury	T9	contusion	42d	10116	Sprague-Dawley	spinal cord;parenchyma	Pld2	D88672	EMBL	16517380	upregulated	gene expression	microarray	ENSG00000129219
spinal cord injury	T9	contusion	42d	10116	Sprague-Dawley	spinal cord;parenchyma	Beta-arrestin-2	P29067	UniProt	16517380	upregulated	gene expression	microarray	ENSG00000141480
spinal cord injury	T9	contusion	42d	10116	Sprague-Dawley	spinal cord;parenchyma	Tubulin beta-5 chain	P69897	UniProt	16517380	upregulated	gene expression	microarray	ENSG00000196230
spinal cord injury	T9	contusion	42d	10116	Lewis	spinal cord;parenchyma	TGFbr1	L26110	EMBL	16517380	upregulated	gene expression	microarray	ENSG00000106799
spinal cord injury	T9	contusion	42d	10116	Lewis	spinal cord;parenchyma	Bzrp	J05122	EMBL	16517380	upregulated	gene expression	microarray	ENSG00000100300
spinal cord injury	T9	contusion	42d	10116	Lewis	spinal cord;parenchyma	Synuclein g	X86789	EMBL	16517380	upregulated	gene expression	microarray	ENSG00000173267
spinal cord injury	T9	contusion	42d	10116	Lewis	spinal cord;parenchyma	t-PA	M23697	EMBL	16517380	upregulated	gene expression	microarray	ENSG00000104368
spinal cord injury	T9	contusion	42d	10116	Lewis	spinal cord;parenchyma	P2X-4	U47031	EMBL	16517380	upregulated	gene expression	microarray	ENSG00000135124
spinal cord injury	T9	contusion	42d	10116	Lewis	spinal cord;parenchyma	Heat shock 27-kDa protein-1 beta	P42930	UniProt	16517380	upregulated	gene expression	microarray	ENSG00000106211
spinal cord injury	T9	contusion	42d	10116	Long-Evans	spinal cord;parenchyma	Synaptophysin	X06655	EMBL	16517380	downregulated	gene expression	microarray	ENSG00000102003
spinal cord injury	T9	contusion	42d	10116	Lewis	spinal cord;parenchyma	MAP1b	U52950	EMBL	16517380	downregulated	gene expression	microarray	ENSG00000131711
spinal cord injury	T9	contusion	42d	10116	Lewis	spinal cord;parenchyma	K1 channel	X62840	EMBL	16517380	downregulated	gene expression	microarray	ENSG00000129159
spinal cord injury	T9	contusion	42d	10116	Lewis	spinal cord;parenchyma	PD-2	D28560	EMBL	16517380	downregulated	gene expression	microarray	ENSG00000136960
spinal cord injury	T9	contusion	42d	10116	Lewis	spinal cord;parenchyma	V-gated K1 channel	M59980	EMBL	16517380	downregulated	gene expression	microarray	ENSG00000184408
spinal cord injury	T9	contusion	42d	10116	Lewis	spinal cord;parenchyma	Neurogranin	L09119	EMBL	16517380	downregulated	gene expression	microarray	ENSG00000154146
spinal cord injury	T9	contusion	42d	10116	Lewis	spinal cord;parenchyma	Prkar2b	M12492	EMBL	16517380	downregulated	gene expression	microarray	ENSG00000005249
spinal cord injury	T9	contusion	42d	10116	Lewis	spinal cord;parenchyma	Plasma membrane calcium-transporting ATPase 2	P11506	UniProt	16517380	downregulated	gene expression	microarray	ENSG00000157087
spinal cord injury	T9	contusion	42d	10116	Lewis	spinal cord;parenchyma	Neurofilament heavy polypeptide	P16884	UniProt	16517380	downregulated	gene expression	microarray	ENSG00000100285
spinal cord injury	T9	contusion	42d	10116	Lewis	spinal cord;parenchyma	Sv2a	L05435	EMBL	16517380	downregulated	gene expression	microarray	ENSG00000159164
spinal cord injury	T9	contusion	42d	10116	Long-Evans	spinal cord;parenchyma	Heat shock protein beta-1	P42930	UniProt	16517380	upregulated	gene expression	microarray	ENSG00000106211
spinal cord injury	T9	contusion	42d	10116	Sprague-Dawley	spinal cord;parenchyma	Heat shock protein beta-1	P42930	UniProt	16517380	upregulated	gene expression	microarray	ENSG00000106211
spinal cord injury	T9	contusion	42d	10116	Long-Evans	spinal cord;parenchyma	Vimentin	X62952	EMBL	16517380	upregulated	gene expression	microarray	ENSG00000026025
spinal cord injury	T9	contusion	42d	10116	Sprague-Dawley	spinal cord;parenchyma	Vimentin	X62952	EMBL	16517380	upregulated	gene expression	microarray	ENSG00000026025
spinal cord injury	T9	contusion	42d	10116	Lewis	spinal cord;parenchyma	Vimentin	X62952	EMBL	16517380	upregulated	gene expression	microarray	ENSG00000026025
spinal cord injury	T9	contusion	42d	10116	Long-Evans	spinal cord;parenchyma	Insulin-like growth factor I	P08025	UniProt	16517380	upregulated	gene expression	microarray	ENSG00000017427
spinal cord injury	T9	contusion	42d	10116	Lewis	spinal cord;parenchyma	Insulin-like growth factor I	P08025	UniProt	16517380	upregulated	gene expression	microarray	ENSG00000017427
spinal cord injury	T9	contusion	42d	10116	Long-Evans	spinal cord;parenchyma	Silence factor B	X60769	EMBL	16517380	upregulated	gene expression	microarray	ENSG00000172216
spinal cord injury	T9	contusion	42d	10116	Lewis	spinal cord;parenchyma	Silence factor B	X60769	EMBL	16517380	upregulated	gene expression	microarray	ENSG00000172216
spinal cord injury	T9	contusion	42d	10116	Long-Evans	spinal cord;parenchyma	Microtubule-associated protein 2	P15146	UniProt	16517380	upregulated	gene expression	microarray	ENSG00000078018
spinal cord injury	T9	contusion	42d	10116	Lewis	spinal cord;parenchyma	Microtubule-associated protein 2	P15146	UniProt	16517380	upregulated	gene expression	microarray	ENSG00000078018
spinal cord injury	T9	contusion	42d	10116	Long-Evans	spinal cord;parenchyma	Apolipoprotein E	P02650	UniProt	16517380	upregulated	gene expression	microarray	ENSG00000130203
spinal cord injury	T9	contusion	42d	10116	Sprague-Dawley	spinal cord;parenchyma	Apolipoprotein E	P02650	UniProt	16517380	upregulated	gene expression	microarray	ENSG00000130203
spinal cord injury	T9	contusion	42d	10116	Lewis	spinal cord;parenchyma	Apolipoprotein E	P02650	UniProt	16517380	upregulated	gene expression	microarray	ENSG00000130203
spinal cord injury	T9	contusion	42d	10116	Long-Evans	spinal cord;parenchyma	Heme oxygenase 1	P06762	UniProt	16517380	upregulated	gene expression	microarray	ENSG00000100292
spinal cord injury	T9	contusion	42d	10116	Sprague-Dawley	spinal cord;parenchyma	Heme oxygenase 1	P06762	UniProt	16517380	upregulated	gene expression	microarray	ENSG00000100292
spinal cord injury	T9	contusion	42d	10116	Lewis	spinal cord;parenchyma	Heme oxygenase 1	P06762	UniProt	16517380	upregulated	gene expression	microarray	ENSG00000100292
spinal cord injury	T9	contusion	42d	10116	Long-Evans	spinal cord;parenchyma	Caspase-1	P43527	UniProt	16517380	upregulated	gene expression	microarray	ENSG00000137752
spinal cord injury	T9	contusion	42d	10116	Lewis	spinal cord;parenchyma	Caspase-1	P43527	UniProt	16517380	upregulated	gene expression	microarray	ENSG00000137752
spinal cord injury	T9	contusion	42d	10116	Sprague-Dawley	spinal cord;parenchyma	Early growth response protein 1	P08154	UniProt	16517380	upregulated	gene expression	microarray	ENSG00000120738
spinal cord injury	T9	contusion	42d	10116	Long-Evans	spinal cord;parenchyma	Cathepsin K	O35186	UniProt	16517380	upregulated	gene expression	microarray	ENSG00000143387
spinal cord injury	T9	contusion	42d	10116	Sprague-Dawley	spinal cord;parenchyma	Cathepsin K	O35186	UniProt	16517380	upregulated	gene expression	microarray	ENSG00000143387
spinal cord injury	T9	contusion	42d	10116	Lewis	spinal cord;parenchyma	Cathepsin K	O35186	UniProt	16517380	upregulated	gene expression	microarray	ENSG00000143387
spinal cord injury	T9	contusion	42d	10116	Long-Evans	spinal cord;parenchyma	Catechol O-methyltransferase	P22734	UniProt	16517380	upregulated	gene expression	microarray	ENSG00000093010
spinal cord injury	T9	contusion	42d	10116	Lewis	spinal cord;parenchyma	Catechol O-methyltransferase	P22734	UniProt	16517380	upregulated	gene expression	microarray	ENSG00000093010
spinal cord injury	T9	contusion	42d	10116	Sprague-Dawley	spinal cord;parenchyma	GFAP	AF028784	EMBL	16517380	upregulated	gene expression	microarray	ENSG00000131095
spinal cord injury	T9	contusion	42d	10116	Sprague-Dawley	spinal cord;parenchyma	Mpz	K03242	EMBL	16517380	upregulated	gene expression	microarray	ENSG00000158887
spinal cord injury	T9	contusion	42d	10116	Sprague-Dawley	spinal cord;parenchyma	Guanine nucleotide-binding protein G(I)/G(S)/G(T) subunit beta-1	P54311	UniProt	16517380	upregulated	gene expression	microarray	ENSG00000078369
spinal cord injury	T9	contusion	42d	10116	Long-Evans	spinal cord;parenchyma	MAG	M22357	EMBL	16517380	downregulated	gene expression	microarray	ENSG00000105695
spinal cord injury	T9	contusion	42d	10116	Lewis	spinal cord;parenchyma	MAG	M22357	EMBL	16517380	downregulated	gene expression	microarray	ENSG00000105695
spinal cord injury	T9	contusion	42d	10116	Long-Evans	spinal cord;parenchyma	Methylsterol monooxygenase 1	O35532	UniProt	16517380	downregulated	gene expression	microarray	ENSG00000052802
spinal cord injury	T9	contusion	42d	10116	Sprague-Dawley	spinal cord;parenchyma	Methylsterol monooxygenase 1	O35532	UniProt	16517380	downregulated	gene expression	microarray	ENSG00000052802
spinal cord injury	T9	contusion	42d	10116	Lewis	spinal cord;parenchyma	Methylsterol monooxygenase 1	O35532	UniProt	16517380	downregulated	gene expression	microarray	ENSG00000052802
spinal cord injury	T9	contusion	42d	10116	Long-Evans	spinal cord;parenchyma	Syt11	AF000423	EMBL	16517380	downregulated	gene expression	microarray	ENSG00000132718
spinal cord injury	T9	contusion	42d	10116	Long-Evans	spinal cord;parenchyma	Atp1a3	M28648	EMBL	16517380	downregulated	gene expression	microarray	ENSG00000105409
spinal cord injury	T9	contusion	42d	10116	Lewis	spinal cord;parenchyma	Atp1a3	M28648	EMBL	16517380	downregulated	gene expression	microarray	ENSG00000105409
spinal cord injury	T9	contusion	42d	10116	Long-Evans	spinal cord;parenchyma	Nfl	M25638	EMBL	16517380	downregulated	gene expression	microarray	ENSG00000277586
spinal cord injury	T9	contusion	42d	10116	Lewis	spinal cord;parenchyma	Nfl	M25638	EMBL	16517380	downregulated	gene expression	microarray	ENSG00000277586
spinal cord injury	T9	contusion	42d	10116	Long-Evans	spinal cord;parenchyma	NCKX2	AF021923	EMBL	16517380	downregulated	gene expression	microarray	ENSG00000155886
spinal cord injury	T9	contusion	42d	10116	Lewis	spinal cord;parenchyma	NCKX2	AF021923	EMBL	16517380	downregulated	gene expression	microarray	ENSG00000155886
spinal cord injury	T9	contusion	42d	10116	Lewis	spinal cord;parenchyma	Glycine receptor subunit alpha-2	P22771	UniProt	16517380	downregulated	gene expression	microarray	ENSG00000101958
spinal cord injury	T9	contusion	42d	10116	Sprague-Dawley	spinal cord;parenchyma	SNAP 25B	AB003992	EMBL	16517380	downregulated	gene expression	microarray	ENSG00000132639
spinal cord injury	T9	contusion	42d	10116	Lewis	spinal cord;parenchyma	SNAP 25B	AB003992	EMBL	16517380	downregulated	gene expression	microarray	ENSG00000132639
spinal cord injury	T10	contusion	21d	10116	Lewis	spinal cord;parenchyma	Bad	NM_022698	RefSeq_NT	19469692	upregulated	gene expression	microarray	ENSG00000002330
spinal cord injury	T10	contusion	21d	10116	Lewis	spinal cord;parenchyma	Bak1	NM_053812	RefSeq_NT	19469692	upregulated	gene expression	microarray	ENSG00000030110
spinal cord injury	T10	contusion	21d	10116	Lewis	spinal cord;parenchyma	Bcl10	NM_031328	RefSeq_NT	19469692	upregulated	gene expression	microarray	ENSG00000142867
spinal cord injury	T10	contusion	21d	10116	Lewis	spinal cord;parenchyma	Bcl2a1	NM_133416	RefSeq_NT	19469692	upregulated	gene expression	microarray	ENSG00000140379
spinal cord injury	T10	contusion	21d	10116	Lewis	spinal cord;parenchyma	Bcl2l1	NM_031535	RefSeq_NT	19469692	upregulated	gene expression	microarray	ENSG00000129473
spinal cord injury	T10	contusion	21d	10116	Lewis	spinal cord;parenchyma	Bcl2l1	NM_031535	RefSeq_NT	19469692	upregulated	gene expression	microarray	ENSG00000171552
spinal cord injury	T10	contusion	21d	10116	Lewis	spinal cord;parenchyma	Bid	NM_022684	RefSeq_NT	19469692	upregulated	gene expression	microarray	ENSG00000015475
spinal cord injury	T10	contusion	21d	10116	Lewis	spinal cord;parenchyma	Bik	NM_053704	RefSeq_NT	19469692	upregulated	gene expression	microarray	ENSG00000100290
spinal cord injury	T10	contusion	21d	10116	Lewis	spinal cord;parenchyma	Birc3	NM_023987	RefSeq_NT	19469692	upregulated	gene expression	microarray	ENSG00000023445
spinal cord injury	T10	contusion	21d	10116	Lewis	spinal cord;parenchyma	Birc5	NM_022274	RefSeq_NT	19469692	downregulated	gene expression	microarray	ENSG00000089685
spinal cord injury	T10	contusion	21d	10116	Lewis	spinal cord;parenchyma	Cflar (Flip)	NM_057138	RefSeq_NT	19469692	upregulated	gene expression	microarray	ENSG00000003402
spinal cord injury	T10	contusion	21d	10116	Lewis	spinal cord;parenchyma	Casp1	NM_012762	RefSeq_NT	19469692	upregulated	gene expression	microarray	ENSG00000137752
spinal cord injury	T10	contusion	21d	10116	Lewis	spinal cord;parenchyma	Casp3	NM_012922	RefSeq_NT	19469692	upregulated	gene expression	microarray	ENSG00000164305
spinal cord injury	T10	contusion	21d	10116	Lewis	spinal cord;parenchyma	Casp7	NM_022260	RefSeq_NT	19469692	upregulated	gene expression	microarray	ENSG00000165806
spinal cord injury	T10	contusion	21d	10116	Lewis	spinal cord;parenchyma	Casp8	NM_022277	RefSeq_NT	19469692	upregulated	gene expression	microarray	ENSG00000064012
spinal cord injury	T10	contusion	21d	10116	Lewis	spinal cord;parenchyma	Casp9	NM_031632	RefSeq_NT	19469692	upregulated	gene expression	microarray	ENSG00000132906
spinal cord injury	T10	contusion	21d	10116	Lewis	spinal cord;parenchyma	Dffb (Cad)	NM_053362	RefSeq_NT	19469692	upregulated	gene expression	microarray	ENSG00000169598
spinal cord injury	T10	contusion	21d	10116	Lewis	spinal cord;parenchyma	Fadd	NM_152937	RefSeq_NT	19469692	upregulated	gene expression	microarray	ENSG00000168040
spinal cord injury	T10	contusion	21d	10116	Lewis	spinal cord;parenchyma	Tnfrsf6 (Fas)	NM_139194	RefSeq_NT	19469692	upregulated	gene expression	microarray	ENSG00000026103
spinal cord injury	T10	contusion	21d	10116	Lewis	spinal cord;parenchyma	CD40lg	NM_053353	RefSeq_NT	19469692	upregulated	gene expression	microarray	ENSG00000102245
spinal cord injury	T10	contusion	21d	10116	Lewis	spinal cord;parenchyma	Lta (Tnfb)	NM_080769	RefSeq_NT	19469692	upregulated	gene expression	microarray	ENSG00000230279
spinal cord injury	T10	contusion	21d	10116	Lewis	spinal cord;parenchyma	TNF-alpha	NM_012675	RefSeq_NT	19469692	upregulated	gene expression	microarray	ENSG00000204490
spinal cord injury	T10	contusion	21d	10116	Lewis	spinal cord;parenchyma	Tnfrsf1a (TNFR1)	NM_013091	RefSeq_NT	19469692	upregulated	gene expression	microarray	ENSG00000067182
spinal cord injury	T10	contusion	21d	10116	Lewis	spinal cord;parenchyma	Tnfrsf1b (TNFR2)	NM_130426	RefSeq_NT	19469692	upregulated	gene expression	microarray	ENSG00000028137
spinal cord injury	T10	contusion	21d	10116	Lewis	spinal cord;parenchyma	Tnfrsf5 (CD40)	NM_134360	RefSeq_NT	19469692	upregulated	gene expression	microarray	ENSG00000101017
spinal cord injury	T10	contusion	21d	10116	Lewis	spinal cord;parenchyma	Tp53 (P53)	NM_030989	RefSeq_NT	19469692	upregulated	gene expression	microarray	ENSG00000141510
spinal cord injury	T10	contusion	21d	10116	Lewis	spinal cord;parenchyma	Protein Tradd	D3ZZC5	UniProt	19469692	upregulated	gene expression	microarray	ENSG00000102871
spinal cord injury	T10	contusion	21d	10116	Lewis	spinal cord;parenchyma	Protein Traf1	M0R5V5	UniProt	19469692	upregulated	gene expression	microarray	ENSG00000056558
spinal cord injury	L1	ischemia	1d	10116	Sprague-Dawley	spinal cord;vasculature	Activin A receptor, type 1	NM_024486	RefSeq_NT	19663807	downregulated	gene expression	microarray	ENSG00000115170
spinal cord injury	L1	ischemia	1d	10116	Sprague-Dawley	spinal cord;vasculature	BMP and activin membrane-bound inhibitor, homolog (Xenopus laevis)	NM_139082	RefSeq_NT	19663807	downregulated	gene expression	microarray	ENSG00000095739
spinal cord injury	L1	ischemia	1d	10116	Sprague-Dawley	spinal cord;vasculature	Bone gamma-carboxyglutamate protein 2	NM_013414	RefSeq_NT	19663807	downregulated	gene expression	microarray	ENSG00000242252
spinal cord injury	L1	ischemia	1d	10116	Sprague-Dawley	spinal cord;vasculature	Bone morphogenetic protein 6	NM_013107	RefSeq_NT	19663807	downregulated	gene expression	microarray	ENSG00000153162
spinal cord injury	L1	ischemia	1d	10116	Sprague-Dawley	spinal cord;vasculature	Bone morphogenetic protein receptor, type 1B (mapped)	NM_001014259	RefSeq_NT	19663807	downregulated	gene expression	microarray	ENSG00000161980
spinal cord injury	L1	ischemia	1d	10116	Sprague-Dawley	spinal cord;vasculature	Cell division cycle 25 homolog A	NM_133571	RefSeq_NT	19663807	downregulated	gene expression	microarray	ENSG00000164045
spinal cord injury	L1	ischemia	6hr	10116	Sprague-Dawley	spinal cord;vasculature	Cyclin-dependent kinase inhibitor 1A	NM_080782	RefSeq_NT	19663807	upregulated	gene expression	microarray	ENSG00000124762
spinal cord injury	L1	ischemia	1d	10116	Sprague-Dawley	spinal cord;vasculature	Chordin	Q63148	UniProt	19663807	downregulated	gene expression	microarray	ENSG00000090539
spinal cord injury	L1	ischemia	1d	10116	Sprague-Dawley	spinal cord;vasculature	Procollagen, type 1, alpha 1	P02454	UniProt	19663807	downregulated	gene expression	microarray	ENSG00000108821
spinal cord injury	L1	ischemia	6hr	10116	Sprague-Dawley	spinal cord;vasculature	Cystatin C	NM_012837	RefSeq_NT	19663807	downregulated	gene expression	microarray	ENSG00000101439
spinal cord injury	L1	ischemia	1d	10116	Sprague-Dawley	spinal cord;vasculature	Cystatin C	NM_012837	RefSeq_NT	19663807	downregulated	gene expression	microarray	ENSG00000101439
spinal cord injury	L1	ischemia	1d	10116	Sprague-Dawley	spinal cord;vasculature	FK506 binding protein 1b	NM_022675	RefSeq_NT	19663807	downregulated	gene expression	microarray	ENSG00000119782
spinal cord injury	L1	ischemia	6hr	10116	Sprague-Dawley	spinal cord;vasculature	FB3 murine osteosarcoma viral oncogene homolog	NM_022197	RefSeq_NT	19663807	upregulated	gene expression	microarray	ENSG00000170345
spinal cord injury	L1	ischemia	1d	10116	Sprague-Dawley	spinal cord;vasculature	FB3 murine osteosarcoma viral oncogene homolog	NM_022197	RefSeq_NT	19663807	upregulated	gene expression	microarray	ENSG00000170345
spinal cord injury	L1	ischemia	1d	10116	Sprague-Dawley	spinal cord;vasculature	Inhibitor of DNA binding 2	NM_013060	RefSeq_NT	19663807	downregulated	gene expression	microarray	ENSG00000115738
spinal cord injury	L1	ischemia	1d	10116	Sprague-Dawley	spinal cord;vasculature	Insulin-like growth factor binding protein 3	NM_012588	RefSeq_NT	19663807	upregulated	gene expression	microarray	ENSG00000146674
spinal cord injury	L1	ischemia	6hr	10116	Sprague-Dawley	spinal cord;vasculature	Interleukin 6	NM_012589	RefSeq_NT	19663807	upregulated	gene expression	microarray	ENSG00000136244
spinal cord injury	L1	ischemia	1d	10116	Sprague-Dawley	spinal cord;vasculature	Inhibin alpha	NM_012590	RefSeq_NT	19663807	downregulated	gene expression	microarray	ENSG00000123999
spinal cord injury	L1	ischemia	6hr	10116	Sprague-Dawley	spinal cord;vasculature	Jun oncogene	NM_021835	RefSeq_NT	19663807	upregulated	gene expression	microarray	ENSG00000177606
spinal cord injury	L1	ischemia	6hr	10116	Sprague-Dawley	spinal cord;vasculature	Jun-B oncogene	NM_021836	RefSeq_NT	19663807	upregulated	gene expression	microarray	ENSG00000171223
spinal cord injury	L1	ischemia	1d	10116	Sprague-Dawley	spinal cord;vasculature	Latent transforming growth factor beta binding protein 1	NM_021587	RefSeq_NT	19663807	downregulated	gene expression	microarray	ENSG00000049323
spinal cord injury	L1	ischemia	1d	10116	Sprague-Dawley	spinal cord;vasculature	Myelocytomatosis viral oncogene homolog (avian)	NM_012603	RefSeq_NT	19663807	upregulated	gene expression	microarray	ENSG00000136997
spinal cord injury	L1	ischemia	1d	10116	Sprague-Dawley	spinal cord;vasculature	Noggin	Q62809	UniProt	19663807	downregulated	gene expression	microarray	ENSG00000183691
spinal cord injury	L1	ischemia	1d	10116	Sprague-Dawley	spinal cord;vasculature	Plasminogen activator, tissue	NM_013151	RefSeq_NT	19663807	downregulated	gene expression	microarray	ENSG00000104368
spinal cord injury	L1	ischemia	6hr	10116	Sprague-Dawley	spinal cord;vasculature	Plasminogen activator, urokinase	NM_013085	RefSeq_NT	19663807	upregulated	gene expression	microarray	ENSG00000122861
spinal cord injury	L1	ischemia	1d	10116	Sprague-Dawley	spinal cord;vasculature	Plasminogen activator, urokinase	NM_013085	RefSeq_NT	19663807	upregulated	gene expression	microarray	ENSG00000122861
spinal cord injury	L1	ischemia	6hr	10116	Sprague-Dawley	spinal cord;vasculature	Serine (or cysteine) peptidase inhibitor, clade E, member 1	NM_012620	RefSeq_NT	19663807	upregulated	gene expression	microarray	ENSG00000106366
spinal cord injury	L1	ischemia	1d	10116	Sprague-Dawley	spinal cord;vasculature	Serine (or cysteine) peptidase inhibitor, clade E, member 1	NM_012620	RefSeq_NT	19663807	upregulated	gene expression	microarray	ENSG00000106366
spinal cord injury	L1	ischemia	6hr	10116	Sprague-Dawley	spinal cord;vasculature	MAD homolog 4 (Drosophila)	NM_019275	RefSeq_NT	19663807	downregulated	gene expression	microarray	ENSG00000141646
spinal cord injury	L1	ischemia	1d	10116	Sprague-Dawley	spinal cord;vasculature	MAD homolog 5 (Drosophila)	NM_021692	RefSeq_NT	19663807	downregulated	gene expression	microarray	ENSG00000113658
spinal cord injury	L1	ischemia	1d	10116	Sprague-Dawley	spinal cord;vasculature	TSC22 domain family, member 1	P62501	UniProt	19663807	downregulated	gene expression	microarray	ENSG00000102804
spinal cord injury	L1	ischemia	1d	10116	Sprague-Dawley	spinal cord;vasculature	Transofrming growth factor, beta 2	NM_031131	RefSeq_NT	19663807	downregulated	gene expression	microarray	ENSG00000092969
spinal cord injury	L1	ischemia	6hr	10116	Sprague-Dawley	spinal cord;vasculature	TG interacting factor	NM_001015020	RefSeq_NT	19663807	upregulated	gene expression	microarray	ENSG00000177426
spinal cord injury	L1	ischemia	1d	10116	Sprague-Dawley	spinal cord;vasculature	TG interacting factor	NM_001015020	RefSeq_NT	19663807	upregulated	gene expression	microarray	ENSG00000177426
spinal cord injury	L1	ischemia	1d	10116	Sprague-Dawley	spinal cord;vasculature	Hypoxanthine guanine phosphoribosyl transferase	NM_012583	RefSeq_NT	19663807	downregulated	gene expression	microarray	ENSG00000165704
spinal cord injury	T10	contusion	3d	10116	Long-Evans	spinal cord;parenchyma	Chemokine (C-X-C motif) ligand 13	Q5I0J6	UniProt	20525361	upregulated	gene expression	microarray	ENSG00000156234
spinal cord injury	T10	contusion	3d	10116	Long-Evans	spinal cord;parenchyma	Heat shock protein beta-1	P42930	UniProt	20525361	upregulated	gene expression	microarray	ENSG00000106211
spinal cord injury	T10	contusion	3d	10116	Long-Evans	spinal cord;parenchyma	G2/mitotic-specific cyclin-B1	P30277	UniProt	20525361	upregulated	gene expression	microarray	ENSG00000134057
spinal cord injury	T10	contusion	3d	10116	Long-Evans	spinal cord;parenchyma	Galectin-3	P08699	UniProt	20525361	upregulated	gene expression	microarray	ENSG00000131981
spinal cord injury	T10	contusion	3d	10116	Long-Evans	spinal cord;parenchyma	Protein-lysine 6-oxidase	P16636	UniProt	20525361	upregulated	gene expression	microarray	ENSG00000113083
spinal cord injury	T10	contusion	3d	10116	Long-Evans	spinal cord;parenchyma	Cyclic AMP-dependent transcription factor ATF-3	P29596	UniProt	20525361	upregulated	gene expression	microarray	ENSG00000162772
spinal cord injury	T10	contusion	3d	10116	Long-Evans	spinal cord;parenchyma	Hematopoietic cell signal transducer	Q6X9T8	UniProt	20525361	upregulated	gene expression	microarray	ENSG00000126264
spinal cord injury	T10	contusion	3d	10116	Long-Evans	spinal cord;parenchyma	Adhesion G protein-coupled receptor E2	Q5Y4N8	UniProt	20525361	upregulated	gene expression	microarray	ENSG00000174837
spinal cord injury	T10	contusion	3d	10116	Long-Evans	spinal cord;parenchyma	Serine/threonine-protein kinase PLK1	Q62673	UniProt	20525361	upregulated	gene expression	microarray	ENSG00000166851
spinal cord injury	T10	contusion	3d	10116	Long-Evans	spinal cord;parenchyma	Protein Fyb	D3ZIE4	UniProt	20525361	upregulated	gene expression	microarray	ENSG00000082074
spinal cord injury	T10	contusion	3d	10116	Long-Evans	spinal cord;parenchyma	Kinetochore protein Nuf2	Q6AYL9	UniProt	20525361	upregulated	gene expression	microarray	ENSG00000143228
spinal cord injury	T10	contusion	3d	10116	Long-Evans	spinal cord;parenchyma	Protein Diaph3	F1LVW7	UniProt	20525361	upregulated	gene expression	microarray	ENSG00000139734
spinal cord injury	T10	contusion	3d	10116	Long-Evans	spinal cord;parenchyma	C->U-editing enzyme APOBEC-1	P38483	UniProt	20525361	upregulated	gene expression	microarray	ENSG00000111701
spinal cord injury	T10	contusion	3d	10116	Long-Evans	spinal cord;parenchyma	Neutrophil gelatinase-associated lipocalin	P30152	UniProt	20525361	upregulated	gene expression	microarray	ENSG00000148346
spinal cord injury	T10	contusion	3d	10116	Long-Evans	spinal cord;parenchyma	Cytochrome b-245, beta polypeptide, isoform CRA_a	Q9ERL1	UniProt	20525361	upregulated	gene expression	microarray	ENSG00000165168
spinal cord injury	T10	contusion	3d	10116	Long-Evans	spinal cord;parenchyma	similar to cancer susceptibility candidate 5 isoform 1	Q8K3X0	UniProt	20525361	upregulated	gene expression	microarray	ENSG00000108349
spinal cord injury	T10	contusion	3d	10116	Long-Evans	spinal cord;parenchyma	Protein Tlr7	A5H2Z9	UniProt	20525361	upregulated	gene expression	microarray	ENSG00000196664
spinal cord injury	T10	contusion	3d	10116	Long-Evans	spinal cord;parenchyma	Translocator protein	P16257	UniProt	20525361	upregulated	gene expression	microarray	ENSG00000100300
spinal cord injury	T10	contusion	3d	10116	Long-Evans	spinal cord;parenchyma	Complement C1q subcomponent subunit C	P31722	UniProt	20525361	upregulated	gene expression	microarray	ENSG00000159189
spinal cord injury	T10	contusion	3d	10116	Long-Evans	spinal cord;parenchyma	Phospholipase A1 member A	P97535	UniProt	20525361	upregulated	gene expression	microarray	ENSG00000144837
spinal cord injury	T10	contusion	3d	10116	Long-Evans	spinal cord;parenchyma	Protein S100-A11	Q6B345	UniProt	20525361	upregulated	gene expression	microarray	ENSG00000163191
spinal cord injury	T10	contusion	3d	10116	Long-Evans	spinal cord;parenchyma	ProteinGuanine nucleotide-binding protein subunit gamma	D3ZLD6	UniProt	20525361	upregulated	gene expression	microarray	ENSG00000167083
spinal cord injury	T10	contusion	3d	10116	Long-Evans	spinal cord;parenchyma	Transcription factor EC	Q63302	UniProt	20525361	upregulated	gene expression	microarray	ENSG00000105967
spinal cord injury	T10	contusion	3d	10116	Long-Evans	spinal cord;parenchyma	Filamin alpha	C0JPT7	UniProt	20525361	upregulated	gene expression	microarray	ENSG00000196924
spinal cord injury	T10	contusion	3d	10116	Long-Evans	spinal cord;parenchyma	[Pyruvate dehydrogenase (acetyl-transferring)] kinase isozyme 4, mitochondrial	O54937	UniProt	20525361	upregulated	gene expression	microarray	ENSG00000004799
spinal cord injury	T10	contusion	3d	10116	Long-Evans	spinal cord;parenchyma	T-cell surface glycoprotein CD4	P05540	UniProt	20525361	upregulated	gene expression	microarray	ENSG00000010610
spinal cord injury	T10	contusion	3d	10116	Long-Evans	spinal cord;parenchyma	Proto-oncogene tyrosine-protein kinase receptor Ret	G3V9H8	UniProt	20525361	upregulated	gene expression	microarray	ENSG00000165731
spinal cord injury	T10	contusion	3d	10116	Long-Evans	spinal cord;parenchyma	Neuronal regeneration-related protein	Q80Z34	UniProt	20525361	downregulated	gene expression	microarray	ENSG00000134986
spinal cord injury	T10	contusion	3d	10116	Long-Evans	spinal cord;parenchyma	Sodium- and chloride-dependent GABA transporter 3	P31647	UniProt	20525361	downregulated	gene expression	microarray	ENSG00000132164
spinal cord injury	T10	contusion	3d	10116	Long-Evans	spinal cord;parenchyma	Protein ABHD1	Q5RK23	UniProt	20525361	downregulated	gene expression	microarray	ENSG00000143994
spinal cord injury	T10	contusion	3d	10116	Long-Evans	spinal cord;parenchyma	Protein Rlbp1	D3Z956	UniProt	20525361	downregulated	gene expression	microarray	ENSG00000140522
spinal cord injury	T10	contusion	3d	10116	Long-Evans	spinal cord;parenchyma	Membrane-bound carbonic anhydrase 14	A2IBE0	UniProt	20525361	downregulated	gene expression	microarray	ENSG00000118298
spinal cord injury	T10	contusion	3d	10116	Long-Evans	spinal cord;parenchyma	Thiosulfate sulfurtransferase	P24329	UniProt	20525361	downregulated	gene expression	microarray	ENSG00000128311
spinal cord injury	T10	contusion	3d	10116	Long-Evans	spinal cord;parenchyma	Fatty acid-binding protein, heart	P07483	UniProt	20525361	downregulated	gene expression	microarray	ENSG00000121769
spinal cord injury	T10	contusion	3d	10116	Long-Evans	spinal cord;parenchyma	ATP-sensitive inward rectifier potassium channel 10	P49655	UniProt	20525361	downregulated	gene expression	microarray	ENSG00000177807
spinal cord injury	T10	contusion	3d	10116	Long-Evans	spinal cord;parenchyma	Solute carrier family 22 member 5	O70594	UniProt	20525361	downregulated	gene expression	microarray	ENSG00000197375
spinal cord injury	T10	contusion	3d	10116	Long-Evans	spinal cord;parenchyma	Citrate lyase subunit beta-like protein, mitochondrial	Q5I0K3	UniProt	20525361	downregulated	gene expression	microarray	ENSG00000125246
spinal cord injury	T10	contusion	3d	10116	Long-Evans	spinal cord;parenchyma	Sodium-coupled neutral amino acid transporter 2	Q9JHE5	UniProt	20525361	downregulated	gene expression	microarray	ENSG00000134294
spinal cord injury	T10	contusion	3d	10116	Long-Evans	spinal cord;parenchyma	Asc-type amino acid transporter 1	P63116	UniProt	20525361	downregulated	gene expression	microarray	ENSG00000130876
spinal cord injury	T10	contusion	3d	10116	Long-Evans	spinal cord;parenchyma	Protein Dok6	F1M038	UniProt	20525361	downregulated	gene expression	microarray	ENSG00000206052
spinal cord injury	T10	contusion	3d	10116	Long-Evans	spinal cord;parenchyma	PEX5-related protein	Q925N3	UniProt	20525361	downregulated	gene expression	microarray	ENSG00000114757
spinal cord injury	T10	contusion	3d	10116	Long-Evans	spinal cord;parenchyma	Sprouty-related, EVH1 domain-containing protein 2	Q3C2P8	UniProt	20525361	downregulated	gene expression	microarray	ENSG00000198369
spinal cord injury	T10	contusion	3d	10116	Long-Evans	spinal cord;parenchyma	Protein lin-7 homolog B	Q9Z252	UniProt	20525361	downregulated	gene expression	microarray	ENSG00000104863
spinal cord injury	T10	contusion	3d	10116	Long-Evans	spinal cord;parenchyma	Protein Kank4	D4A6X3	UniProt	20525361	downregulated	gene expression	microarray	ENSG00000132854
spinal cord injury	T10	contusion	3d	10116	Long-Evans	spinal cord;parenchyma	Prosaposin receptor GPR37	Q9QYC6	UniProt	20525361	downregulated	gene expression	microarray	ENSG00000170775
spinal cord injury	T10	contusion	3d	10116	Long-Evans	spinal cord;parenchyma	N-acetylneuraminate lyase	Q66H59	UniProt	20525361	downregulated	gene expression	microarray	ENSG00000135838
spinal cord injury	T10	contusion	21d	10116	Lewis	spinal cord;parenchyma	BAG family molecular chaperone regulator 1	B0K019	UniProt	21748659	upregulated	gene expression	microarray	ENSG00000107262
spinal cord injury	T10	contusion	21d	10116	Lewis	spinal cord;parenchyma	Breast cancer type 2 susceptibility protein homolog	O35923	UniProt	21748659	upregulated	gene expression	microarray	ENSG00000139618
spinal cord injury	T10	contusion	21d	10116	Lewis	spinal cord;parenchyma	Cyclin-dependent kinase 1	P39951	UniProt	21748659	upregulated	gene expression	microarray	ENSG00000170312
spinal cord injury	T10	contusion	21d	10116	Lewis	spinal cord;parenchyma	Cellular tumor antigen p53	P10361	UniProt	21748659	upregulated	gene expression	microarray	ENSG00000141510
spinal cord injury	T10	contusion	21d	10116	Lewis	spinal cord;parenchyma	Cyclin-dependent kinase inhibitor 1A	Q64315	UniProt	21748659	upregulated	gene expression	microarray	ENSG00000124762
spinal cord injury	T10	contusion	21d	10116	Lewis	spinal cord;parenchyma	Tumor protein 63	Q9JJP6	UniProt	21748659	downregulated	gene expression	microarray	ENSG00000073282
spinal cord injury	T10	contusion	21d	10116	Lewis	spinal cord;parenchyma	DNA-(apurinic or apyrimidinic site) lyase	P43138	UniProt	21748659	upregulated	gene expression	microarray	ENSG00000100823
spinal cord injury	T10	contusion	21d	10116	Lewis	spinal cord;parenchyma	Ataxia telangiectasia mutated homolog (Human) (Mapped), isoform CRA_a	D4ACL8	UniProt	21748659	upregulated	gene expression	microarray	ENSG00000149311
spinal cord injury	T10	contusion	21d	10116	Lewis	spinal cord;parenchyma	Serine/threonine-protein kinase Chk1	Q91ZN7	UniProt	21748659	upregulated	gene expression	microarray	ENSG00000149554
spinal cord injury	T10	contusion	21d	10116	Lewis	spinal cord;parenchyma	Structural maintenance of chromosomes protein 3	P97690	UniProt	21748659	upregulated	gene expression	microarray	ENSG00000108055
spinal cord injury	T10	contusion	21d	10116	Lewis	spinal cord;parenchyma	Growth arrest and DNA damage-inducible protein GADD45 alpha	P48317	UniProt	21748659	upregulated	gene expression	microarray	ENSG00000116717
spinal cord injury	T10	contusion	21d	10116	Lewis	spinal cord;parenchyma	DNA repair protein XRCC1	Q9ESZ0	UniProt	21748659	upregulated	gene expression	microarray	ENSG00000073050
spinal cord injury	T10	contusion	21d	10116	Lewis	spinal cord;parenchyma	N-glycosylase/DNA lyase	O70249	UniProt	21748659	upregulated	gene expression	microarray	ENSG00000114026
spinal cord injury	T10	contusion	21d	10116	Lewis	spinal cord;parenchyma	Poly [ADP-ribose] polymerase 1	P27008	UniProt	21748659	upregulated	gene expression	microarray	ENSG00000143799
spinal cord injury	T10	contusion	21d	9606	human	spinal cord;parenchyma	Double-strand-break repair protein rad21 homolog	O60216	UniProt	21748659	downregulated	gene expression	microarray	ENSG00000164754
spinal cord injury	T10	contusion	21d	10116	Lewis	spinal cord;parenchyma	60S acidic ribosomal protein P1	P19944	UniProt	21748659	downregulated	gene expression	microarray	ENSG00000137818
spinal cord injury	T9	contusion	4hr	10116	Sprague-Dawley	spinal cord;parenchyma	Prostaglandin G/H synthase 2	P35355	UniProt	21975064	upregulated	gene expression	microarray	ENSG00000073756
spinal cord injury	T9	contusion	1d	10116	Sprague-Dawley	spinal cord;parenchyma	Prostaglandin G/H synthase 2	P35355	UniProt	21975064	upregulated	gene expression	microarray	ENSG00000073756
spinal cord injury	T9	contusion	3mo	10116	Sprague-Dawley	spinal cord;parenchyma	Prostaglandin G/H synthase 2	P35355	UniProt	21975064	upregulated	gene expression	microarray	ENSG00000073756
spinal cord injury	T9	contusion	6mo	10116	Sprague-Dawley	spinal cord;parenchyma	Prostaglandin G/H synthase 2	P35355	UniProt	21975064	upregulated	gene expression	microarray	ENSG00000073756
spinal cord injury	T9	contusion	1d	10116	Sprague-Dawley	spinal cord;parenchyma	Osteopontin	P08721	UniProt	21975064	upregulated	gene expression	microarray	ENSG00000118785
spinal cord injury	T9	contusion	3d	10116	Sprague-Dawley	spinal cord;parenchyma	Osteopontin	P08721	UniProt	21975064	upregulated	gene expression	microarray	ENSG00000118785
spinal cord injury	T9	contusion	7d	10116	Sprague-Dawley	spinal cord;parenchyma	Osteopontin	P08721	UniProt	21975064	upregulated	gene expression	microarray	ENSG00000118785
spinal cord injury	T9	contusion	6mo	10116	Sprague-Dawley	spinal cord;parenchyma	Osteopontin	P08721	UniProt	21975064	upregulated	gene expression	microarray	ENSG00000118785
spinal cord injury	T9	contusion	4hr	10116	Sprague-Dawley	spinal cord;parenchyma	Protein S100-A8	P50115	UniProt	21975064	upregulated	gene expression	microarray	ENSG00000143546
spinal cord injury	T9	contusion	1d	10116	Sprague-Dawley	spinal cord;parenchyma	Protein S100-A8	P50115	UniProt	21975064	upregulated	gene expression	microarray	ENSG00000143546
spinal cord injury	T9	contusion	3d	10116	Sprague-Dawley	spinal cord;parenchyma	Protein S100-A8	P50115	UniProt	21975064	upregulated	gene expression	microarray	ENSG00000143546
spinal cord injury	T9	contusion	1d	10116	Sprague-Dawley	spinal cord;parenchyma	Complement C1q subcomponent subunit B	P31721	UniProt	21975064	upregulated	gene expression	microarray	ENSG00000173369
spinal cord injury	T9	contusion	3d	10116	Sprague-Dawley	spinal cord;parenchyma	Complement C1q subcomponent subunit B	P31721	UniProt	21975064	upregulated	gene expression	microarray	ENSG00000173369
spinal cord injury	T9	contusion	7d	10116	Sprague-Dawley	spinal cord;parenchyma	Complement C1q subcomponent subunit B	P31721	UniProt	21975064	upregulated	gene expression	microarray	ENSG00000173369
spinal cord injury	T9	contusion	14d	10116	Sprague-Dawley	spinal cord;parenchyma	Complement C1q subcomponent subunit B	P31721	UniProt	21975064	upregulated	gene expression	microarray	ENSG00000173369
spinal cord injury	T9	contusion	28d	10116	Sprague-Dawley	spinal cord;parenchyma	Complement C1q subcomponent subunit B	P31721	UniProt	21975064	upregulated	gene expression	microarray	ENSG00000173369
spinal cord injury	T9	contusion	3mo	10116	Sprague-Dawley	spinal cord;parenchyma	Complement C1q subcomponent subunit B	P31721	UniProt	21975064	upregulated	gene expression	microarray	ENSG00000173369
spinal cord injury	T9	contusion	6mo	10116	Sprague-Dawley	spinal cord;parenchyma	Complement C1q subcomponent subunit B	P31721	UniProt	21975064	upregulated	gene expression	microarray	ENSG00000173369
spinal cord injury	T9	contusion	4hr	10116	Sprague-Dawley	spinal cord;parenchyma	Galectin-3	P08699	UniProt	21975064	upregulated	gene expression	microarray	ENSG00000131981
spinal cord injury	T9	contusion	1d	10116	Sprague-Dawley	spinal cord;parenchyma	Galectin-3	P08699	UniProt	21975064	upregulated	gene expression	microarray	ENSG00000131981
spinal cord injury	T9	contusion	3d	10116	Sprague-Dawley	spinal cord;parenchyma	Galectin-3	P08699	UniProt	21975064	upregulated	gene expression	microarray	ENSG00000131981
spinal cord injury	T9	contusion	7d	10116	Sprague-Dawley	spinal cord;parenchyma	Galectin-3	P08699	UniProt	21975064	upregulated	gene expression	microarray	ENSG00000131981
spinal cord injury	T9	contusion	14d	10116	Sprague-Dawley	spinal cord;parenchyma	Galectin-3	P08699	UniProt	21975064	upregulated	gene expression	microarray	ENSG00000131981
spinal cord injury	T9	contusion	28d	10116	Sprague-Dawley	spinal cord;parenchyma	Galectin-3	P08699	UniProt	21975064	upregulated	gene expression	microarray	ENSG00000131981
spinal cord injury	T9	contusion	3mo	10116	Sprague-Dawley	spinal cord;parenchyma	Galectin-3	P08699	UniProt	21975064	upregulated	gene expression	microarray	ENSG00000131981
spinal cord injury	T9	contusion	6mo	10116	Sprague-Dawley	spinal cord;parenchyma	Galectin-3	P08699	UniProt	21975064	upregulated	gene expression	microarray	ENSG00000131981
spinal cord injury	T9	contusion	1d	10116	Sprague-Dawley	spinal cord;parenchyma	Cytochrome b-245 light chain	Q62737	UniProt	21975064	upregulated	gene expression	microarray	ENSG00000051523
spinal cord injury	T9	contusion	3d	10116	Sprague-Dawley	spinal cord;parenchyma	Cytochrome b-245 light chain	Q62737	UniProt	21975064	upregulated	gene expression	microarray	ENSG00000051523
spinal cord injury	T9	contusion	7d	10116	Sprague-Dawley	spinal cord;parenchyma	Cytochrome b-245 light chain	Q62737	UniProt	21975064	upregulated	gene expression	microarray	ENSG00000051523
spinal cord injury	T9	contusion	14d	10116	Sprague-Dawley	spinal cord;parenchyma	Cytochrome b-245 light chain	Q62737	UniProt	21975064	upregulated	gene expression	microarray	ENSG00000051523
spinal cord injury	T9	contusion	28d	10116	Sprague-Dawley	spinal cord;parenchyma	Cytochrome b-245 light chain	Q62737	UniProt	21975064	upregulated	gene expression	microarray	ENSG00000051523
spinal cord injury	T9	contusion	3mo	10116	Sprague-Dawley	spinal cord;parenchyma	Cytochrome b-245 light chain	Q62737	UniProt	21975064	upregulated	gene expression	microarray	ENSG00000051523
spinal cord injury	T9	contusion	1d	10116	Sprague-Dawley	spinal cord;parenchyma	Leukocyte surface antigen CD53	P24485	UniProt	21975064	upregulated	gene expression	microarray	ENSG00000143119
spinal cord injury	T9	contusion	3d	10116	Sprague-Dawley	spinal cord;parenchyma	Leukocyte surface antigen CD53	P24485	UniProt	21975064	upregulated	gene expression	microarray	ENSG00000143119
spinal cord injury	T9	contusion	7d	10116	Sprague-Dawley	spinal cord;parenchyma	Leukocyte surface antigen CD53	P24485	UniProt	21975064	upregulated	gene expression	microarray	ENSG00000143119
spinal cord injury	T9	contusion	14d	10116	Sprague-Dawley	spinal cord;parenchyma	Leukocyte surface antigen CD53	P24485	UniProt	21975064	upregulated	gene expression	microarray	ENSG00000143119
spinal cord injury	T9	contusion	28d	10116	Sprague-Dawley	spinal cord;parenchyma	Leukocyte surface antigen CD53	P24485	UniProt	21975064	upregulated	gene expression	microarray	ENSG00000143119
spinal cord injury	T9	contusion	3mo	10116	Sprague-Dawley	spinal cord;parenchyma	Leukocyte surface antigen CD53	P24485	UniProt	21975064	upregulated	gene expression	microarray	ENSG00000143119
spinal cord injury	T9	contusion	6mo	10116	Sprague-Dawley	spinal cord;parenchyma	Leukocyte surface antigen CD53	P24485	UniProt	21975064	upregulated	gene expression	microarray	ENSG00000143119
spinal cord injury	T10	transection	28d	10116	Sprague-Dawley	spinal cord;parenchyma	Vimentin	NM_031140	RefSeq_NT	24874717	upregulated	gene expression	microarray	ENSG00000026025
spinal cord injury	T10	transection	28d	10116	Sprague-Dawley	spinal cord;parenchyma	keratin 86	NM_001008810	RefSeq_NT	24874717	upregulated	gene expression	microarray	ENSG00000170442
spinal cord injury	T10	transection	28d	10116	Sprague-Dawley	spinal cord;parenchyma	keratin 36	NM_001008759	RefSeq_NT	24874717	upregulated	gene expression	microarray	ENSG00000126337
spinal cord injury	T10	transection	28d	10116	Sprague-Dawley	spinal cord;parenchyma	keratin 24	NM_001004131	RefSeq_NT	24874717	upregulated	gene expression	microarray	ENSG00000167916
spinal cord injury	T10	transection	28d	10116	Sprague-Dawley	spinal cord;parenchyma	keratin 35	NM_001008820	RefSeq_NT	24874717	upregulated	gene expression	microarray	ENSG00000197079
spinal cord injury	T10	transection	28d	10116	Sprague-Dawley	spinal cord;parenchyma	keratin 17	NM_212545	RefSeq_NT	24874717	upregulated	gene expression	microarray	ENSG00000128422
spinal cord injury	T8	contusion	4d	10116	Wistar	spinal cord;parenchyma	Glycoprotein 38	NM_019358	RefSeq_NT	16344894	upregulated	gene expression	microarray	ENSG00000162493
spinal cord injury	T8	contusion	4d	10116	Wistar	spinal cord;parenchyma	Preproalbumin	V01222	EMBL	16344894	upregulated	gene expression	microarray	ENSG00000163631
spinal cord injury	T8	contusion	4d	10116	Wistar	spinal cord;parenchyma	RT1.Ma	Z49761	EMBL	16344894	upregulated	gene expression	microarray	ENSG00000204257
spinal cord injury	T8	contusion	4d	10116	Wistar	spinal cord;parenchyma	Phosphatidylinositol 4-kinase	NM_031083	RefSeq_NT	16344894	upregulated	gene expression	microarray	ENSG00000143393
spinal cord injury	T8	contusion	4d	10116	Wistar	spinal cord;parenchyma	Clusterin	P05371	UniProt	16344894	upregulated	gene expression	microarray	ENSG00000120885
spinal cord injury	T8	contusion	4d	10116	Wistar	spinal cord;parenchyma	Actin-related protein complex 1b	NM_019289	RefSeq_NT	16344894	upregulated	gene expression	microarray	ENSG00000130429
spinal cord injury	T8	contusion	4d	10116	Wistar	spinal cord;parenchyma	Lysosomal-associated protein transmembrane 5	NM_053538	RefSeq_NT	16344894	upregulated	gene expression	microarray	ENSG00000162511
spinal cord injury	T8	contusion	4d	10116	Wistar	spinal cord;parenchyma	DORA protein	AJ223184	EMBL	16344894	upregulated	gene expression	microarray	ENSG00000140749
spinal cord injury	T8	contusion	4d	10116	Wistar	spinal cord;parenchyma	Potassium voltage-gated channel subfamily H member 6	O54853	UniProt	16344894	upregulated	gene expression	microarray	ENSG00000173826
spinal cord injury	T8	contusion	4d	10116	Wistar	spinal cord;parenchyma	Mama	AF065438	EMBL	16344894	upregulated	gene expression	microarray	ENSG00000108679
spinal cord injury	T8	contusion	4d	10116	Wistar	spinal cord;parenchyma	TORID	AF370882	EMBL	16344894	upregulated	gene expression	microarray	ENSG00000106565
spinal cord injury	T8	contusion	4d	10116	Wistar	spinal cord;parenchyma	Cathepsin B	NM_022597	RefSeq_NT	16344894	upregulated	gene expression	microarray	ENSG00000164733
spinal cord injury	T8	contusion	4d	10116	Wistar	spinal cord;parenchyma	Cathepsin Y	AB023781	EMBL	16344894	upregulated	gene expression	microarray	ENSG00000101160
spinal cord injury	T8	contusion	4d	10116	Wistar	spinal cord;parenchyma	Cathepsin S	NM_017320	RefSeq_NT	16344894	upregulated	gene expression	microarray	ENSG00000163131
spinal cord injury	T8	contusion	4d	10116	Wistar	spinal cord;parenchyma	Vimentin	NM_031140	RefSeq_NT	16344894	upregulated	gene expression	microarray	ENSG00000026025
spinal cord injury	T8	contusion	4d	10116	Wistar	spinal cord;parenchyma	Transgelin(Smooth muscle 22 protein)	NM_031549	RefSeq_NT	16344894	upregulated	gene expression	microarray	ENSG00000149591
spinal cord injury	T8	contusion	4d	10116	Wistar	spinal cord;parenchyma	Tissue inhibitor of metalloproteinase1	NM_053819	RefSeq_NT	16344894	upregulated	gene expression	microarray	ENSG00000102265
spinal cord injury	T8	contusion	4d	10116	Wistar	spinal cord;parenchyma	Stearyl-CoA desaturase	J02585	EMBL	16344894	downregulated	gene expression	microarray	ENSG00000099194
spinal cord injury	T8	contusion	4d	10116	Wistar	spinal cord;parenchyma	Survival of motor neuron protein interacting protein1	NM_053389	RefSeq_NT	16344894	downregulated	gene expression	microarray	ENSG00000092208
spinal cord injury	T8	contusion	4d	10116	Wistar	spinal cord;parenchyma	Coagulation factor II (F2)	NM_022924	RefSeq_NT	16344894	downregulated	gene expression	microarray	ENSG00000180210
spinal cord injury	T8	contusion	4d	10116	Wistar	spinal cord;parenchyma	Transthyretin (prealbumin,amyloidosis type I)	NM_012681	RefSeq_NT	16344894	downregulated	gene expression	microarray	ENSG00000118271
spinal cord injury	T8	contusion	4d	10116	Wistar	spinal cord;parenchyma	Inositol polyphosphate-4-phosphatase type II	NM_053917	RefSeq_NT	16344894	downregulated	gene expression	microarray	ENSG00000109452
spinal cord injury	T8	contusion	4d	10116	Wistar	spinal cord;parenchyma	Lipoprotein lipase	NM_012598	RefSeq_NT	16344894	downregulated	gene expression	microarray	ENSG00000175445
spinal cord injury	T8	contusion	4d	10116	Wistar	spinal cord;parenchyma	Gamma-butyrobetaine hydroxylase	NM_022629	RefSeq_NT	16344894	downregulated	gene expression	microarray	ENSG00000129151
spinal cord injury	T8	contusion	4d	10116	Wistar	spinal cord;parenchyma	Paraoxonase	U94856	EMBL	16344894	downregulated	gene expression	microarray	ENSG00000005421
spinal cord injury	T8	contusion	4d	10116	Wistar	spinal cord;parenchyma	Chimerin (chimaerin)1	NM_032083	RefSeq_NT	16344894	downregulated	gene expression	microarray	ENSG00000128656
spinal cord injury	T8	contusion	4d	10116	Wistar	spinal cord;parenchyma	Fibrinogen, gamma polypeptide	NM_012559	RefSeq_NT	16344894	downregulated	gene expression	microarray	ENSG00000171557
spinal cord injury	T8	contusion	4d	10116	Wistar	spinal cord;parenchyma	C-reactive protein	NM_017096	RefSeq_NT	16344894	downregulated	gene expression	microarray	ENSG00000132693
spinal cord injury	T8	contusion	4d	10116	Wistar	spinal cord;parenchyma	3-hydroxy-3-methylglutaryl-Coenzyme A synthase1	NM_017268	RefSeq_NT	16344894	downregulated	gene expression	microarray	ENSG00000112972
spinal cord injury	T8	contusion	4d	10116	Wistar	spinal cord;parenchyma	ClassII MHC RT1.D(n) beta chain precursor	AF084933	EMBL	16344894	downregulated	gene expression	microarray	ENSG00000198502
spinal cord injury	T8	contusion	4d	10116	Wistar	spinal cord;parenchyma	Bile acid-CoenzymeA dehydrogenase:amino acid n-acyltransferase	NM_017300	RefSeq_NT	16344894	downregulated	gene expression	microarray	ENSG00000136881
spinal cord injury	T8	contusion	4d	10116	Wistar	spinal cord;parenchyma	Fetuin beta	NM_053348	RefSeq_NT	16344894	downregulated	gene expression	microarray	ENSG00000090512
spinal cord injury	T8	contusion	4d	10116	Wistar	spinal cord;parenchyma	Procollagen type I alpha2	NM_053356	RefSeq_NT	16344894	downregulated	gene expression	microarray	ENSG00000164692
spinal cord injury	T8	contusion	4d	10116	Wistar	spinal cord;parenchyma	Surfactant protein C	NM_017342	RefSeq_NT	16344894	downregulated	gene expression	microarray	ENSG00000168484
spinal cord injury	all	contusion	1d	9606	human	spinal cord;plasma	Stromal cell-derived factor 1	P48061	UniProt	24968203	upregulated	proteomics	immunoassay	ENSG00000107562
spinal cord injury	all	contusion	3d	9606	human	spinal cord;plasma	Stromal cell-derived factor 1	P48061	UniProt	24968203	upregulated	proteomics	immunoassay	ENSG00000107562
spinal cord injury	all	contusion	1d	9606	human	spinal cord;plasma	Hepatocyte growth factor	P14210	UniProt	24968203	upregulated	proteomics	immunoassay	ENSG00000019991
spinal cord injury	all	contusion	3d	9606	human	spinal cord;plasma	Hepatocyte growth factor	P14210	UniProt	24968203	upregulated	proteomics	immunoassay	ENSG00000019991
spinal cord injury	all	contusion	7d	9606	human	spinal cord;plasma	Hepatocyte growth factor	P14210	UniProt	24968203	upregulated	proteomics	immunoassay	ENSG00000019991
spinal cord injury	all	contusion	3d	9606	human	spinal cord;plasma	Insulin-like growth factor I	P05019	UniProt	24968203	upregulated	proteomics	immunoassay	ENSG00000017427
spinal cord injury	all	contusion	1d	9606	human	spinal cord;plasma	Angiopoietin-2	O15123	UniProt	24968203	upregulated	proteomics	immunoassay	ENSG00000091879
spinal cord injury	all	contusion	1d	9606	human	spinal cord;plasma	Pro-epidermal growth factor	P01133	UniProt	24968203	upregulated	proteomics	immunoassay	ENSG00000138798
spinal cord injury	all	contusion	1d	9606	human	spinal cord;plasma	Endoglin	P17813	UniProt	24968203	upregulated	proteomics	immunoassay	ENSG00000106991
spinal cord injury	all	contusion	7d	9606	human	spinal cord;plasma	Endoglin	P17813	UniProt	24968203	upregulated	proteomics	immunoassay	ENSG00000106991
spinal cord injury	all	contusion	1d	9606	human	spinal cord;plasma	Placenta growth factor	P49763	UniProt	24968203	upregulated	proteomics	immunoassay	ENSG00000119630
spinal cord injury	all	contusion	7d	9606	human	spinal cord;plasma	Placenta growth factor	P49763	UniProt	24968203	upregulated	proteomics	immunoassay	ENSG00000119630
spinal cord injury	all	contusion	7d	9606	human	spinal cord;plasma	Brain-derived neurotrophic factor	P23560	UniProt	24968203	upregulated	proteomics	immunoassay	ENSG00000176697
