# Supplementary material for: Integrated systems analysis reveals conserved gene networks underlying response to spinal cord injury
Source: eLife. 2018 Oct 2;7:e39188. doi: 10.7554/eLife.39188 (PMC6173583; doi:10.7554/eLife.39188)
Supplement: Supplementary file 2. [file elife-39188-supp2.xlsx]

## Sheet: Dataset S2
Gene	Module
ENSG00000227232	0
ENSG00000237683	3
ENSG00000225972	5
ENSG00000225630	5
ENSG00000237973	5
ENSG00000229344	5
ENSG00000240409	5
ENSG00000248527	0
ENSG00000198744	5
ENSG00000188976	0
ENSG00000188290	0
ENSG00000187608	5
ENSG00000188157	2
ENSG00000078808	13
ENSG00000176022	0
ENSG00000160087	15
ENSG00000162572	0
ENSG00000131584	2
ENSG00000169972	10
ENSG00000127054	13
ENSG00000240731	13
ENSG00000224051	0
ENSG00000107404	15
ENSG00000162576	9
ENSG00000175756	12
ENSG00000221978	13
ENSG00000224870	4
ENSG00000242485	0
ENSG00000235098	1
ENSG00000205116	1
ENSG00000179403	1
ENSG00000160072	0
ENSG00000197785	10
ENSG00000205090	2
ENSG00000160075	5
ENSG00000228594	2
ENSG00000272106	1
ENSG00000197530	2
ENSG00000248333	4
ENSG00000189339	1
ENSG00000008128	15
ENSG00000008130	3
ENSG00000078369	0
ENSG00000187730	9
ENSG00000067606	1
ENSG00000157933	3
ENSG00000157916	1
ENSG00000157911	1
ENSG00000149527	1
ENSG00000157873	3
ENSG00000157870	2
ENSG00000158109	2
ENSG00000116213	13
ENSG00000227372	1
ENSG00000130764	1
ENSG00000116198	1
ENSG00000198912	0
ENSG00000069424	2
ENSG00000116254	2
ENSG00000116251	8
ENSG00000116237	0
ENSG00000097021	2
ENSG00000215788	2
ENSG00000171680	0
ENSG00000204859	0
ENSG00000162413	0
ENSG00000007923	1
ENSG00000171735	2
ENSG00000049245	1
ENSG00000049246	1
ENSG00000116288	12
ENSG00000116285	0
ENSG00000142599	2
ENSG00000074800	5
ENSG00000142583	7
ENSG00000049239	1
ENSG00000171621	0
ENSG00000171612	4
ENSG00000171603	2
ENSG00000178585	1
ENSG00000162441	1
ENSG00000162444	1
ENSG00000130939	1
ENSG00000054523	1
ENSG00000142657	0
ENSG00000160049	11
ENSG00000142655	2
ENSG00000120948	4
ENSG00000271895	2
ENSG00000116649	5
ENSG00000171824	1
ENSG00000116661	9
ENSG00000132879	2
ENSG00000116670	11
ENSG00000177674	11
ENSG00000011021	1
ENSG00000116685	1
ENSG00000083444	3
ENSG00000116688	4
ENSG00000116691	3
ENSG00000028137	3
ENSG00000048707	1
ENSG00000162496	3
ENSG00000162493	3
ENSG00000116731	1
ENSG00000189337	1
ENSG00000142634	5
ENSG00000116786	5
ENSG00000233954	0
ENSG00000065526	0
ENSG00000116809	0
ENSG00000232456	1
ENSG00000185519	1
ENSG00000055070	10
ENSG00000157191	11
ENSG00000219481	1
ENSG00000215908	2
ENSG00000236698	1
ENSG00000058453	2
ENSG00000159363	2
ENSG00000117118	11
ENSG00000117115	1
ENSG00000179051	0
ENSG00000074964	5
ENSG00000117154	5
ENSG00000159423	5
ENSG00000169991	0
ENSG00000127481	14
ENSG00000053372	12
ENSG00000053371	9
ENSG00000040487	1
ENSG00000077549	7
ENSG00000173436	12
ENSG00000158747	5
ENSG00000162545	2
ENSG00000090432	1
ENSG00000158828	4
ENSG00000244038	7
ENSG00000127483	14
ENSG00000075151	0
ENSG00000117298	3
ENSG00000162551	3
ENSG00000076864	2
ENSG00000090686	1
ENSG00000218510	8
ENSG00000070831	1
ENSG00000173372	7
ENSG00000159189	7
ENSG00000173369	7
ENSG00000133216	1
ENSG00000004487	2
ENSG00000125944	1
ENSG00000088280	3
ENSG00000117318	3
ENSG00000142676	8
ENSG00000011007	4
ENSG00000057757	1
ENSG00000011009	5
ENSG00000117305	1
ENSG00000179163	0
ENSG00000189266	6
ENSG00000188529	6
ENSG00000001461	1
ENSG00000133226	1
ENSG00000169504	6
ENSG00000117614	8
ENSG00000117616	1
ENSG00000183726	1
ENSG00000204178	0
ENSG00000157978	1
ENSG00000117643	0
ENSG00000162430	3
ENSG00000117640	2
ENSG00000117632	1
ENSG00000130695	1
ENSG00000142669	3
ENSG00000158062	2
ENSG00000198830	0
ENSG00000117676	7
ENSG00000117713	1
ENSG00000142751	1
ENSG00000198746	1
ENSG00000090273	12
ENSG00000253368	2
ENSG00000142784	1
ENSG00000186501	0
ENSG00000158195	6
ENSG00000000938	3
ENSG00000126709	5
ENSG00000117758	1
ENSG00000117751	1
ENSG00000130775	11
ENSG00000117748	9
ENSG00000158156	10
ENSG00000228589	6
ENSG00000126698	4
ENSG00000130770	12
ENSG00000204138	1
ENSG00000197989	3
ENSG00000120656	11
ENSG00000198492	0
ENSG00000116350	3
ENSG00000060656	0
ENSG00000162511	7
ENSG00000162512	2
ENSG00000134644	5
ENSG00000060688	1
ENSG00000121766	1
ENSG00000121769	0
ENSG00000142910	3
ENSG00000162517	10
ENSG00000084636	1
ENSG00000121753	5
ENSG00000184007	4
ENSG00000121774	0
ENSG00000025800	0
ENSG00000084652	11
ENSG00000084623	3
ENSG00000116478	11
ENSG00000175130	1
ENSG00000160058	1
ENSG00000162521	1
ENSG00000134684	3
ENSG00000160097	2
ENSG00000121905	2
ENSG00000121900	12
ENSG00000116514	7
ENSG00000004455	11
ENSG00000142920	1
ENSG00000116525	1
ENSG00000160094	13
ENSG00000134686	11
ENSG00000187513	3
ENSG00000243749	7
ENSG00000116560	0
ENSG00000146463	0
ENSG00000229994	8
ENSG00000142687	0
ENSG00000020129	2
ENSG00000116819	0
ENSG00000126067	1
ENSG00000142686	2
ENSG00000116863	0
ENSG00000054116	5
ENSG00000116871	1
ENSG00000054118	0
ENSG00000142694	3
ENSG00000116883	5
ENSG00000196182	3
ENSG00000181817	5
ENSG00000116898	12
ENSG00000119535	7
ENSG00000163875	2
ENSG00000163879	4
ENSG00000134697	0
ENSG00000196449	0
ENSG00000197982	1
ENSG00000183431	3
ENSG00000183386	3
ENSG00000183520	0
ENSG00000116954	1
ENSG00000158315	1
ENSG00000174574	1
ENSG00000168653	12
ENSG00000127603	1
ENSG00000090621	7
ENSG00000116983	2
ENSG00000084072	1
ENSG00000043514	0
ENSG00000168389	0
ENSG00000131236	6
ENSG00000131238	7
ENSG00000259943	1
ENSG00000084073	6
ENSG00000049089	1
ENSG00000084070	7
ENSG00000117016	2
ENSG00000066136	10
ENSG00000010803	0
ENSG00000198815	0
ENSG00000127125	4
ENSG00000236876	4
ENSG00000065978	3
ENSG00000117385	3
ENSG00000177868	8
ENSG00000117394	3
ENSG00000117395	0
ENSG00000179178	1
ENSG00000066056	3
ENSG00000066322	1
ENSG00000159479	1
ENSG00000178922	10
ENSG00000142949	1
ENSG00000117408	1
ENSG00000132768	1
ENSG00000117410	10
ENSG00000117411	10
ENSG00000196517	1
ENSG00000178028	0
ENSG00000117419	0
ENSG00000187147	1
ENSG00000142937	8
ENSG00000173846	3
ENSG00000070785	1
ENSG00000126107	1
ENSG00000126088	10
ENSG00000132781	10
ENSG00000070759	1
ENSG00000236624	9
ENSG00000117450	1
ENSG00000117448	11
ENSG00000132780	1
ENSG00000159592	6
ENSG00000159596	0
ENSG00000086015	0
ENSG00000117461	5
ENSG00000085998	1
ENSG00000171357	1
ENSG00000132128	1
ENSG00000173660	12
ENSG00000117480	1
ENSG00000079277	7
ENSG00000123472	2
ENSG00000159658	1
ENSG00000162368	4
ENSG00000235105	1
ENSG00000185104	1
ENSG00000123091	0
ENSG00000085832	1
ENSG00000117859	1
ENSG00000078618	0
ENSG00000117862	3
ENSG00000134717	1
ENSG00000157077	0
ENSG00000154222	1
ENSG00000134748	4
ENSG00000162378	2
ENSG00000228929	8
ENSG00000121310	5
ENSG00000116171	1
ENSG00000162384	0
ENSG00000162385	12
ENSG00000058799	11
ENSG00000272091	1
ENSG00000116209	1
ENSG00000116221	0
ENSG00000157216	0
ENSG00000243725	1
ENSG00000116133	1
ENSG00000162402	0
ENSG00000162407	1
ENSG00000185839	6
ENSG00000162601	1
ENSG00000177606	3
ENSG00000134716	1
ENSG00000162599	9
ENSG00000162604	1
ENSG00000132854	1
ENSG00000162607	4
ENSG00000125703	1
ENSG00000079739	5
ENSG00000162434	14
ENSG00000162433	9
ENSG00000116675	1
ENSG00000213625	6
ENSG00000184588	1
ENSG00000142864	4
ENSG00000116717	3
ENSG00000172380	9
ENSG00000162595	2
ENSG00000116729	9
ENSG00000066557	1
ENSG00000116754	1
ENSG00000118454	1
ENSG00000197568	10
ENSG00000132485	1
ENSG00000116791	0
ENSG00000162623	8
ENSG00000117054	4
ENSG00000137955	8
ENSG00000184005	1
ENSG00000226415	3
ENSG00000142892	1
ENSG00000226084	8
ENSG00000154027	1
ENSG00000077254	2
ENSG00000180488	1
ENSG00000219201	6
ENSG00000162613	14
ENSG00000162616	3
ENSG00000137959	0
ENSG00000137965	0
ENSG00000162618	3
ENSG00000137941	1
ENSG00000142875	1
ENSG00000117133	6
ENSG00000174021	3
ENSG00000162642	1
ENSG00000153904	9
ENSG00000142871	0
ENSG00000117174	4
ENSG00000016602	1
ENSG00000097033	1
ENSG00000183291	1
ENSG00000143013	6
ENSG00000065243	1
ENSG00000137947	0
ENSG00000137944	0
ENSG00000213516	4
ENSG00000162645	3
ENSG00000197147	1
ENSG00000171492	1
ENSG00000162664	4
ENSG00000233593	4
ENSG00000122482	1
ENSG00000069712	0
ENSG00000122406	8
ENSG00000154511	1
ENSG00000117500	6
ENSG00000223745	1
ENSG00000137942	9
ENSG00000067334	3
ENSG00000117528	1
ENSG00000117525	3
ENSG00000117519	3
ENSG00000235501	8
ENSG00000122481	1
ENSG00000137970	8
ENSG00000162627	8
ENSG00000099260	3
ENSG00000156875	1
ENSG00000122435	1
ENSG00000137996	0
ENSG00000162692	0
ENSG00000162694	0
ENSG00000170989	3
ENSG00000183298	8
ENSG00000185946	14
ENSG00000240038	0
ENSG00000198890	1
ENSG00000162639	1
ENSG00000134186	4
ENSG00000116266	1
ENSG00000121957	1
ENSG00000121940	1
ENSG00000085433	1
ENSG00000244716	8
ENSG00000197780	4
ENSG00000215717	1
ENSG00000031698	0
ENSG00000143126	1
ENSG00000134222	1
ENSG00000134243	1
ENSG00000143106	11
ENSG00000065135	6
ENSG00000116337	5
ENSG00000168765	3
ENSG00000213366	7
ENSG00000134184	0
ENSG00000134201	9
ENSG00000134202	4
ENSG00000184371	1
ENSG00000168710	9
ENSG00000143093	2
ENSG00000116396	2
ENSG00000134248	11
ENSG00000143119	7
ENSG00000156171	7
ENSG00000064886	3
ENSG00000116455	2
ENSG00000116459	0
ENSG00000143110	3
ENSG00000121933	7
ENSG00000116473	4
ENSG00000143079	6
ENSG00000116489	0
ENSG00000155363	5
ENSG00000155366	3
ENSG00000155380	0
ENSG00000163349	9
ENSG00000116774	7
ENSG00000116752	0
ENSG00000213281	1
ENSG00000009307	4
ENSG00000052723	1
ENSG00000163393	1
ENSG00000163399	2
ENSG00000198162	1
ENSG00000092621	1
ENSG00000198019	7
ENSG00000171943	7
ENSG00000269996	4
ENSG00000196369	7
ENSG00000254539	0
ENSG00000178104	9
ENSG00000272755	4
ENSG00000223380	6
ENSG00000117289	6
ENSG00000121851	8
ENSG00000152022	0
ENSG00000131795	4
ENSG00000131779	2
ENSG00000131788	13
ENSG00000131791	1
ENSG00000180867	6
ENSG00000131778	1
ENSG00000150337	7
ENSG00000184678	3
ENSG00000178096	10
ENSG00000159164	2
ENSG00000143368	15
ENSG00000163113	1
ENSG00000136631	5
ENSG00000023902	7
ENSG00000143401	4
ENSG00000118298	1
ENSG00000117362	0
ENSG00000118292	3
ENSG00000187145	5
ENSG00000117360	0
ENSG00000143374	13
ENSG00000143384	3
ENSG00000143420	4
ENSG00000163131	7
ENSG00000143437	3
ENSG00000143418	1
ENSG00000143412	1
ENSG00000143409	1
ENSG00000197622	14
ENSG00000213190	2
ENSG00000163154	7
ENSG00000163156	10
ENSG00000163159	10
ENSG00000143398	0
ENSG00000159352	12
ENSG00000143393	0
ENSG00000143390	7
ENSG00000143416	9
ENSG00000159377	2
ENSG00000143442	1
ENSG00000143376	1
ENSG00000159409	2
ENSG00000143436	0
ENSG00000197747	3
ENSG00000163191	7
ENSG00000163220	3
ENSG00000143546	3
ENSG00000197956	3
ENSG00000196154	7
ENSG00000188643	3
ENSG00000189171	4
ENSG00000160678	1
ENSG00000160679	6
ENSG00000143553	1
ENSG00000143621	6
ENSG00000143624	13
ENSG00000143614	1
ENSG00000198837	13
ENSG00000160741	0
ENSG00000143570	3
ENSG00000143543	3
ENSG00000143545	8
ENSG00000177954	8
ENSG00000143549	3
ENSG00000143612	6
ENSG00000143569	13
ENSG00000143575	7
ENSG00000160712	3
ENSG00000160714	2
ENSG00000160710	2
ENSG00000163344	10
ENSG00000163346	9
ENSG00000163348	1
ENSG00000160691	3
ENSG00000160685	0
ENSG00000143537	0
ENSG00000169242	11
ENSG00000169241	11
ENSG00000179085	12
ENSG00000163463	10
ENSG00000163462	1
ENSG00000173171	0
ENSG00000177628	1
ENSG00000160767	0
ENSG00000116521	1
ENSG00000176444	13
ENSG00000160752	1
ENSG00000160753	2
ENSG00000116539	0
ENSG00000163374	6
ENSG00000132676	7
ENSG00000132718	1
ENSG00000143622	3
ENSG00000132680	1
ENSG00000116584	1
ENSG00000163479	3
ENSG00000160803	2
ENSG00000116586	12
ENSG00000160789	0
ENSG00000160785	1
ENSG00000160783	1
ENSG00000242252	10
ENSG00000160781	0
ENSG00000198952	13
ENSG00000198715	11
ENSG00000163468	0
ENSG00000125462	2
ENSG00000116604	5
ENSG00000163382	4
ENSG00000160818	4
ENSG00000132702	1
ENSG00000132692	2
ENSG00000132688	0
ENSG00000143320	2
ENSG00000143303	0
ENSG00000143314	11
ENSG00000143321	3
ENSG00000143294	0
ENSG00000132694	5
ENSG00000163563	7
ENSG00000163565	3
ENSG00000162706	2
ENSG00000213088	3
ENSG00000158716	3
ENSG00000272668	4
ENSG00000158710	3
ENSG00000260766	1
ENSG00000143315	1
ENSG00000177807	1
ENSG00000162728	4
ENSG00000162729	1
ENSG00000018625	9
ENSG00000162734	1
ENSG00000132716	1
ENSG00000162735	1
ENSG00000122218	14
ENSG00000162736	1
ENSG00000162738	1
ENSG00000158769	3
ENSG00000158773	2
ENSG00000162755	2
ENSG00000143256	15
ENSG00000158793	11
ENSG00000158796	3
ENSG00000143222	12
ENSG00000143258	13
ENSG00000143224	1
ENSG00000158850	3
ENSG00000158859	1
ENSG00000158864	1
ENSG00000158869	7
ENSG00000248485	2
ENSG00000158887	0
ENSG00000143252	1
ENSG00000188931	4
ENSG00000235477	4
ENSG00000143226	3
ENSG00000173110	3
ENSG00000203747	7
ENSG00000244682	6
ENSG00000225217	3
ENSG00000081721	0
ENSG00000118217	6
ENSG00000152332	2
ENSG00000117143	5
ENSG00000162733	6
ENSG00000132196	11
ENSG00000143248	0
ENSG00000143171	1
ENSG00000143198	10
ENSG00000143149	6
ENSG00000143183	1
ENSG00000143157	4
ENSG00000143162	7
ENSG00000197965	5
ENSG00000143158	12
ENSG00000143164	3
ENSG00000224837	4
ENSG00000143155	14
ENSG00000213064	0
ENSG00000143153	1
ENSG00000117475	1
ENSG00000188404	3
ENSG00000075945	0
ENSG00000117523	14
ENSG00000233328	11
ENSG00000117533	0
ENSG00000197959	1
ENSG00000094975	1
ENSG00000117592	9
ENSG00000234741	8
ENSG00000116161	12
ENSG00000120333	4
ENSG00000116147	0
ENSG00000143207	8
ENSG00000152092	2
ENSG00000116199	2
ENSG00000143337	1
ENSG00000116260	1
ENSG00000135847	1
ENSG00000135823	8
ENSG00000162783	3
ENSG00000135821	3
ENSG00000143333	3
ENSG00000261185	1
ENSG00000135838	7
ENSG00000135829	14
ENSG00000157064	2
ENSG00000116698	3
ENSG00000116701	7
ENSG00000162704	1
ENSG00000143344	0
ENSG00000198756	1
ENSG00000198860	1
ENSG00000116406	6
ENSG00000121486	6
ENSG00000116679	6
ENSG00000047410	0
ENSG00000157181	1
ENSG00000073756	3
ENSG00000090104	0
ENSG00000116741	3
ENSG00000116750	0
ENSG00000116747	1
ENSG00000272579	1
ENSG00000023572	12
ENSG00000134371	1
ENSG00000000971	3
ENSG00000151414	4
ENSG00000081237	7
ENSG00000118200	0
ENSG00000116857	2
ENSG00000174307	1
ENSG00000159176	1
ENSG00000198700	0
ENSG00000198892	1
ENSG00000163431	0
ENSG00000134375	12
ENSG00000176393	7
ENSG00000170075	1
ENSG00000143862	1
ENSG00000077157	1
ENSG00000236439	8
ENSG00000183155	1
ENSG00000117153	0
ENSG00000159346	1
ENSG00000159348	0
ENSG00000163444	5
ENSG00000143847	2
ENSG00000163485	1
ENSG00000133048	3
ENSG00000159388	0
ENSG00000058668	5
ENSG00000058673	1
ENSG00000182004	11
ENSG00000143842	1
ENSG00000143850	1
ENSG00000231691	1
ENSG00000158615	6
ENSG00000133056	0
ENSG00000198625	1
ENSG00000163531	1
ENSG00000184144	1
ENSG00000133059	1
ENSG00000133069	1
ENSG00000162873	2
ENSG00000117266	1
ENSG00000158715	1
ENSG00000069275	1
ENSG00000117280	6
ENSG00000133065	9
ENSG00000163486	7
ENSG00000143486	1
ENSG00000162889	11
ENSG00000196352	3
ENSG00000117335	1
ENSG00000174059	0
ENSG00000123689	3
ENSG00000203706	4
ENSG00000117625	1
ENSG00000153363	1
ENSG00000170385	3
ENSG00000123684	1
ENSG00000066027	6
ENSG00000065600	1
ENSG00000117691	4
ENSG00000162772	3
ENSG00000117697	1
ENSG00000203705	0
ENSG00000174606	1
ENSG00000136643	1
ENSG00000117707	1
ENSG00000143499	2
ENSG00000136636	1
ENSG00000143353	1
ENSG00000136628	1
ENSG00000162813	1
ENSG00000067704	14
ENSG00000218283	14
ENSG00000162819	1
ENSG00000162909	6
ENSG00000143514	9
ENSG00000272645	0
ENSG00000143756	0
ENSG00000143753	1
ENSG00000162923	0
ENSG00000143815	6
ENSG00000154380	0
ENSG00000143742	0
ENSG00000143819	3
ENSG00000242861	1
ENSG00000196187	1
ENSG00000143811	1
ENSG00000143751	1
ENSG00000163041	6
ENSG00000182827	6
ENSG00000143799	1
ENSG00000203685	0
ENSG00000143772	0
ENSG00000143776	0
ENSG00000143761	5
ENSG00000162910	12
ENSG00000143774	10
ENSG00000198835	1
ENSG00000181218	3
ENSG00000168159	2
ENSG00000234975	0
ENSG00000116574	1
ENSG00000168118	1
ENSG00000154429	1
ENSG00000143632	0
ENSG00000069248	1
ENSG00000228058	7
ENSG00000177614	2
ENSG00000135744	9
ENSG00000119280	1
ENSG00000143643	1
ENSG00000173409	1
ENSG00000182118	3
ENSG00000116906	1
ENSG00000135766	1
ENSG00000116918	0
ENSG00000116991	3
ENSG00000135750	1
ENSG00000168275	12
ENSG00000059588	1
ENSG00000168264	0
ENSG00000173726	1
ENSG00000188739	4
ENSG00000054267	1
ENSG00000152904	8
ENSG00000116957	0
ENSG00000168243	2
ENSG00000077585	6
ENSG00000116977	14
ENSG00000077522	1
ENSG00000116984	1
ENSG00000091483	2
ENSG00000143702	1
ENSG00000054282	1
ENSG00000117020	0
ENSG00000179456	9
ENSG00000035687	1
ENSG00000203667	4
ENSG00000153187	0
ENSG00000143653	1
ENSG00000259865	3
ENSG00000227671	7
ENSG00000196071	1
ENSG00000175137	10
ENSG00000171161	10
ENSG00000171163	5
ENSG00000035115	1
ENSG00000143727	1
ENSG00000151353	1
ENSG00000171853	0
ENSG00000182551	1
ENSG00000234171	1
ENSG00000171863	8
ENSG00000232044	1
ENSG00000272268	1
ENSG00000151692	1
ENSG00000115738	0
ENSG00000260837	0
ENSG00000134313	1
ENSG00000143797	1
ENSG00000119185	11
ENSG00000119203	4
ENSG00000134330	11
ENSG00000134308	1
ENSG00000115756	2
ENSG00000115758	9
ENSG00000143870	3
ENSG00000162976	1
ENSG00000169006	9
ENSG00000134324	0
ENSG00000071575	5
ENSG00000079785	0
ENSG00000197872	5
ENSG00000163032	2
ENSG00000240857	1
ENSG00000183891	1
ENSG00000132031	0
ENSG00000068697	3
ENSG00000055917	4
ENSG00000143878	1
ENSG00000119782	2
ENSG00000115128	8
ENSG00000084676	0
ENSG00000184924	4
ENSG00000138031	0
ENSG00000261452	2
ENSG00000272048	15
ENSG00000138101	1
ENSG00000084731	2
ENSG00000084733	1
ENSG00000157833	0
ENSG00000084754	6
ENSG00000138029	9
ENSG00000138018	1
ENSG00000213699	11
ENSG00000157851	1
ENSG00000084764	2
ENSG00000119777	3
ENSG00000228474	10
ENSG00000138073	11
ENSG00000138074	0
ENSG00000138085	11
ENSG00000115204	10
ENSG00000115207	0
ENSG00000115211	10
ENSG00000115234	1
ENSG00000163795	2
ENSG00000115241	5
ENSG00000115216	5
ENSG00000138002	13
ENSG00000115226	5
ENSG00000243943	1
ENSG00000198522	3
ENSG00000119760	14
ENSG00000163798	1
ENSG00000243147	11
ENSG00000158019	5
ENSG00000075426	3
ENSG00000270640	11
ENSG00000213639	9
ENSG00000171103	1
ENSG00000115295	1
ENSG00000119801	2
ENSG00000013016	2
ENSG00000162961	0
ENSG00000021574	1
ENSG00000119820	1
ENSG00000115760	1
ENSG00000152689	1
ENSG00000119812	1
ENSG00000260025	2
ENSG00000150938	3
ENSG00000171055	1
ENSG00000115808	1
ENSG00000152133	1
ENSG00000055332	12
ENSG00000218739	2
ENSG00000115816	4
ENSG00000213553	8
ENSG00000143889	0
ENSG00000115875	6
ENSG00000188010	8
ENSG00000115904	6
ENSG00000011566	0
ENSG00000152154	1
ENSG00000143924	7
ENSG00000115944	8
ENSG00000057935	2
ENSG00000152518	7
ENSG00000138095	1
ENSG00000138032	4
ENSG00000138078	2
ENSG00000116016	3
ENSG00000119729	5
ENSG00000119878	1
ENSG00000171150	1
ENSG00000180398	5
ENSG00000068724	3
ENSG00000143933	1
ENSG00000095002	1
ENSG00000184261	0
ENSG00000230979	8
ENSG00000138081	14
ENSG00000170802	1
ENSG00000162869	4
ENSG00000243244	3
ENSG00000068912	1
ENSG00000068878	0
ENSG00000170634	4
ENSG00000115306	5
ENSG00000238018	1
ENSG00000115310	1
ENSG00000143947	8
ENSG00000085760	1
ENSG00000115355	1
ENSG00000163001	12
ENSG00000138041	4
ENSG00000138035	1
ENSG00000115380	9
ENSG00000055813	5
ENSG00000115392	1
ENSG00000233426	8
ENSG00000173209	0
ENSG00000115464	4
ENSG00000082898	0
ENSG00000115484	6
ENSG00000173163	4
ENSG00000115504	5
ENSG00000014641	2
ENSG00000228305	11
ENSG00000169764	5
ENSG00000143952	4
ENSG00000197329	0
ENSG00000225889	1
ENSG00000119844	5
ENSG00000115902	5
ENSG00000138069	5
ENSG00000172974	6
ENSG00000138071	0
ENSG00000115946	6
ENSG00000221823	2
ENSG00000119865	12
ENSG00000115956	7
ENSG00000169604	9
ENSG00000169599	0
ENSG00000188971	0
ENSG00000196975	4
ENSG00000124380	4
ENSG00000059728	3
ENSG00000169564	3
ENSG00000116001	1
ENSG00000116005	1
ENSG00000143977	12
ENSG00000035141	12
ENSG00000163235	1
ENSG00000144043	1
ENSG00000124357	11
ENSG00000124383	4
ENSG00000124374	4
ENSG00000075292	0
ENSG00000144036	1
ENSG00000116096	3
ENSG00000144040	2
ENSG00000135631	5
ENSG00000135632	0
ENSG00000135617	12
ENSG00000135624	7
ENSG00000144034	4
ENSG00000124356	1
ENSG00000114956	15
ENSG00000163170	12
ENSG00000225439	1
ENSG00000114978	7
ENSG00000065911	3
ENSG00000204843	0
ENSG00000005448	0
ENSG00000114993	1
ENSG00000115274	0
ENSG00000239779	1
ENSG00000115275	0
ENSG00000115307	5
ENSG00000115317	3
ENSG00000159399	7
ENSG00000115350	10
ENSG00000115364	4
ENSG00000163541	11
ENSG00000034510	3
ENSG00000152291	1
ENSG00000042445	1
ENSG00000115459	1
ENSG00000042493	7
ENSG00000168906	0
ENSG00000118640	7
ENSG00000168899	3
ENSG00000168894	11
ENSG00000168890	3
ENSG00000168883	6
ENSG00000168887	1
ENSG00000115523	3
ENSG00000115525	1
ENSG00000132300	1
ENSG00000132305	2
ENSG00000132313	0
ENSG00000068615	2
ENSG00000115548	0
ENSG00000115561	8
ENSG00000239305	1
ENSG00000153561	4
ENSG00000172086	1
ENSG00000144115	1
ENSG00000143429	4
ENSG00000172005	1
ENSG00000144029	0
ENSG00000144026	1
ENSG00000115042	1
ENSG00000232931	13
ENSG00000231584	1
ENSG00000084090	9
ENSG00000135956	2
ENSG00000144021	14
ENSG00000144028	0
ENSG00000196843	3
ENSG00000114982	1
ENSG00000114988	0
ENSG00000168763	1
ENSG00000168758	1
ENSG00000144199	1
ENSG00000230606	2
ENSG00000135940	12
ENSG00000115073	2
ENSG00000075568	14
ENSG00000183513	4
ENSG00000115446	6
ENSG00000071073	7
ENSG00000158411	4
ENSG00000185414	1
ENSG00000241962	1
ENSG00000115514	1
ENSG00000158417	4
ENSG00000135945	1
ENSG00000170500	2
ENSG00000115526	0
ENSG00000115539	4
ENSG00000071082	8
ENSG00000158435	0
ENSG00000163162	3
ENSG00000071054	4
ENSG00000115594	3
ENSG00000115602	3
ENSG00000233639	4
ENSG00000198914	1
ENSG00000135972	1
ENSG00000135974	1
ENSG00000071051	3
ENSG00000119147	3
ENSG00000115652	0
ENSG00000153201	6
ENSG00000186522	1
ENSG00000175701	3
ENSG00000144136	0
ENSG00000125538	3
ENSG00000146556	0
ENSG00000240356	1
ENSG00000144134	0
ENSG00000115091	6
ENSG00000088205	1
ENSG00000125633	14
ENSG00000125629	0
ENSG00000186132	8
ENSG00000155368	9
ENSG00000226479	1
ENSG00000144118	3
ENSG00000074054	2
ENSG00000236859	4
ENSG00000155438	8
ENSG00000211460	1
ENSG00000136732	7
ENSG00000136717	0
ENSG00000163161	13
ENSG00000163166	1
ENSG00000072163	0
ENSG00000144230	1
ENSG00000270081	4
ENSG00000136720	5
ENSG00000136699	1
ENSG00000152082	12
ENSG00000136710	1
ENSG00000136718	12
ENSG00000072135	7
ENSG00000136002	2
ENSG00000152102	1
ENSG00000115762	1
ENSG00000173272	10
ENSG00000152117	13
ENSG00000150551	5
ENSG00000152127	1
ENSG00000152128	0
ENSG00000082258	1
ENSG00000115839	0
ENSG00000048991	2
ENSG00000144224	1
ENSG00000115866	9
ENSG00000121966	0
ENSG00000150540	1
ENSG00000144228	1
ENSG00000121964	4
ENSG00000169554	4
ENSG00000168280	1
ENSG00000168288	6
ENSG00000162980	7
ENSG00000115145	1
ENSG00000157827	1
ENSG00000196504	4
ENSG00000177917	1
ENSG00000144278	1
ENSG00000153234	0
ENSG00000115159	5
ENSG00000136541	1
ENSG00000115170	0
ENSG00000144283	4
ENSG00000115183	1
ENSG00000213189	6
ENSG00000136536	0
ENSG00000241399	7
ENSG00000153250	3
ENSG00000136560	1
ENSG00000115233	0
ENSG00000232320	0
ENSG00000115271	1
ENSG00000198648	1
ENSG00000081479	1
ENSG00000138398	1
ENSG00000138385	0
ENSG00000138382	0
ENSG00000144357	1
ENSG00000128692	6
ENSG00000128683	2
ENSG00000115806	1
ENSG00000198586	1
ENSG00000233762	8
ENSG00000071967	9
ENSG00000077380	1
ENSG00000115840	0
ENSG00000128708	6
ENSG00000091409	3
ENSG00000091428	2
ENSG00000172845	6
ENSG00000138430	0
ENSG00000138433	0
ENSG00000144306	1
ENSG00000115935	1
ENSG00000235655	0
ENSG00000128656	2
ENSG00000115966	0
ENSG00000154518	12
ENSG00000144320	1
ENSG00000224189	1
ENSG00000226363	1
ENSG00000128645	1
ENSG00000128654	1
ENSG00000170144	4
ENSG00000116044	6
ENSG00000018510	1
ENSG00000180228	1
ENSG00000187231	1
ENSG00000163510	8
ENSG00000226564	8
ENSG00000170035	1
ENSG00000138434	4
ENSG00000115252	1
ENSG00000162998	0
ENSG00000061676	0
ENSG00000177855	12
ENSG00000065548	0
ENSG00000138448	1
ENSG00000144369	0
ENSG00000115368	0
ENSG00000138449	0
ENSG00000138381	0
ENSG00000128699	0
ENSG00000187699	1
ENSG00000204253	6
ENSG00000198130	11
ENSG00000151689	1
ENSG00000151690	1
ENSG00000138386	4
ENSG00000115419	5
ENSG00000115415	0
ENSG00000168497	0
ENSG00000144339	1
ENSG00000196950	2
ENSG00000115524	14
ENSG00000115520	0
ENSG00000144381	3
ENSG00000115541	0
ENSG00000115540	5
ENSG00000162944	1
ENSG00000115896	1
ENSG00000178074	1
ENSG00000196141	0
ENSG00000155729	4
ENSG00000082153	0
ENSG00000013441	14
ENSG00000240344	0
ENSG00000196290	1
ENSG00000119013	12
ENSG00000115993	4
ENSG00000082146	1
ENSG00000116030	12
ENSG00000055044	5
ENSG00000204217	0
ENSG00000204196	8
ENSG00000138443	4
ENSG00000023228	1
ENSG00000114942	8
ENSG00000118263	1
ENSG00000244567	1
ENSG00000138413	6
ENSG00000115020	1
ENSG00000078018	2
ENSG00000197713	6
ENSG00000115365	1
ENSG00000021826	1
ENSG00000144451	4
ENSG00000138363	1
ENSG00000115414	3
ENSG00000079246	1
ENSG00000260804	2
ENSG00000197756	8
ENSG00000115461	3
ENSG00000079308	1
ENSG00000163466	3
ENSG00000127837	0
ENSG00000127838	5
ENSG00000135926	6
ENSG00000018280	3
ENSG00000144579	0
ENSG00000144580	0
ENSG00000074582	10
ENSG00000163481	2
ENSG00000135912	1
ENSG00000135929	1
ENSG00000171450	2
ENSG00000115649	1
ENSG00000144567	0
ENSG00000158552	10
ENSG00000115657	5
ENSG00000198925	1
ENSG00000163516	13
ENSG00000115661	1
ENSG00000127824	2
ENSG00000135924	1
ENSG00000054356	2
ENSG00000123992	0
ENSG00000175084	0
ENSG00000144591	3
ENSG00000123989	2
ENSG00000124006	2
ENSG00000114923	2
ENSG00000116120	2
ENSG00000123983	1
ENSG00000171951	2
ENSG00000085449	6
ENSG00000135900	1
ENSG00000135919	9
ENSG00000036257	0
ENSG00000135905	1
ENSG00000168958	1
ENSG00000173744	1
ENSG00000187957	0
ENSG00000153827	1
ENSG00000135899	7
ENSG00000135932	6
ENSG00000237758	11
ENSG00000135916	9
ENSG00000204128	2
ENSG00000173692	0
ENSG00000237039	0
ENSG00000115053	4
ENSG00000187514	0
ENSG00000156973	0
ENSG00000144524	1
ENSG00000163273	2
ENSG00000135930	11
ENSG00000115468	1
ENSG00000182600	1
ENSG00000168918	7
ENSG00000085978	1
ENSG00000077044	1
ENSG00000085982	1
ENSG00000188042	5
ENSG00000130147	1
ENSG00000157985	1
ENSG00000144476	3
ENSG00000198612	9
ENSG00000124831	5
ENSG00000132329	9
ENSG00000184182	12
ENSG00000132323	0
ENSG00000144485	1
ENSG00000204104	4
ENSG00000065802	4
ENSG00000130414	0
ENSG00000172428	10
ENSG00000063660	2
ENSG00000142327	10
ENSG00000142330	0
ENSG00000130294	0
ENSG00000122085	1
ENSG00000115685	12
ENSG00000115677	14
ENSG00000168385	1
ENSG00000115694	13
ENSG00000176720	1
ENSG00000176946	0
ENSG00000168397	13
ENSG00000168393	10
ENSG00000228989	15
ENSG00000168395	0
ENSG00000180902	0
ENSG00000188011	2
ENSG00000113851	1
ENSG00000271870	0
ENSG00000134107	3
ENSG00000134108	1
ENSG00000071282	1
ENSG00000134077	1
ENSG00000168137	0
ENSG00000269975	2
ENSG00000163719	10
ENSG00000114026	1
ENSG00000134072	5
ENSG00000171148	12
ENSG00000241553	7
ENSG00000214021	13
ENSG00000171135	11
ENSG00000163702	5
ENSG00000163703	3
ENSG00000125037	11
ENSG00000254999	7
ENSG00000134086	1
ENSG00000157014	4
ENSG00000157020	11
ENSG00000157087	2
ENSG00000157103	0
ENSG00000144560	6
ENSG00000157152	2
ENSG00000157150	9
ENSG00000075975	1
ENSG00000132155	0
ENSG00000144713	8
ENSG00000144711	2
ENSG00000163517	1
ENSG00000163528	0
ENSG00000170876	3
ENSG00000154767	1
ENSG00000170860	8
ENSG00000131389	0
ENSG00000225733	1
ENSG00000131368	2
ENSG00000131381	1
ENSG00000131375	6
ENSG00000131370	1
ENSG00000144597	0
ENSG00000131373	1
ENSG00000206560	4
ENSG00000263740	0
ENSG00000131386	6
ENSG00000154813	8
ENSG00000131374	1
ENSG00000182568	0
ENSG00000183960	1
ENSG00000144566	1
ENSG00000114166	4
ENSG00000132967	4
ENSG00000182247	1
ENSG00000170142	8
ENSG00000197885	2
ENSG00000174748	8
ENSG00000174738	1
ENSG00000077097	1
ENSG00000151092	11
ENSG00000163512	6
ENSG00000163513	3
ENSG00000163527	6
ENSG00000152642	1
ENSG00000153551	11
ENSG00000091317	3
ENSG00000144635	0
ENSG00000170275	4
ENSG00000153560	5
ENSG00000163539	1
ENSG00000170248	1
ENSG00000178567	2
ENSG00000076242	1
ENSG00000224858	8
ENSG00000093167	1
ENSG00000144674	1
ENSG00000230409	1
ENSG00000187091	9
ENSG00000060971	11
ENSG00000172939	6
ENSG00000114742	1
ENSG00000114745	9
ENSG00000144655	3
ENSG00000168329	7
ENSG00000144659	0
ENSG00000168028	8
ENSG00000168314	4
ENSG00000114784	5
ENSG00000188846	7
ENSG00000272452	4
ENSG00000172888	1
ENSG00000234287	8
ENSG00000168036	14
ENSG00000182606	0
ENSG00000093183	1
ENSG00000008324	4
ENSG00000114857	1
ENSG00000230084	1
ENSG00000114853	4
ENSG00000010282	1
ENSG00000181061	1
ENSG00000144647	2
ENSG00000163788	2
ENSG00000160746	1
ENSG00000011198	1
ENSG00000261786	1
ENSG00000179152	1
ENSG00000163807	1
ENSG00000169964	1
ENSG00000163812	11
ENSG00000075914	12
ENSG00000163815	0
ENSG00000249992	2
ENSG00000211456	1
ENSG00000163820	1
ENSG00000163823	7
ENSG00000181585	12
ENSG00000160808	9
ENSG00000160801	5
ENSG00000160799	10
ENSG00000181555	0
ENSG00000076201	0
ENSG00000114650	13
ENSG00000163832	1
ENSG00000114646	0
ENSG00000173473	4
ENSG00000132153	13
ENSG00000047849	4
ENSG00000164050	1
ENSG00000232112	12
ENSG00000213689	0
ENSG00000164054	5
ENSG00000114270	2
ENSG00000010256	2
ENSG00000225697	3
ENSG00000213672	0
ENSG00000068745	0
ENSG00000178537	1
ENSG00000177479	1
ENSG00000178467	2
ENSG00000178252	13
ENSG00000178149	0
ENSG00000178057	10
ENSG00000178035	11
ENSG00000198218	0
ENSG00000172053	0
ENSG00000172046	1
ENSG00000172037	3
ENSG00000185909	5
ENSG00000114316	0
ENSG00000233276	7
ENSG00000067560	1
ENSG00000145022	1
ENSG00000145020	0
ENSG00000145029	0
ENSG00000173402	1
ENSG00000164062	0
ENSG00000176095	1
ENSG00000182179	7
ENSG00000164076	2
ENSG00000164077	1
ENSG00000004534	0
ENSG00000003756	14
ENSG00000188338	1
ENSG00000114353	6
ENSG00000232352	1
ENSG00000012171	1
ENSG00000214706	11
ENSG00000243477	0
ENSG00000068001	0
ENSG00000114383	2
ENSG00000068028	11
ENSG00000114388	2
ENSG00000114395	1
ENSG00000126062	0
ENSG00000088543	2
ENSG00000114738	3
ENSG00000088538	1
ENSG00000145050	3
ENSG00000164081	10
ENSG00000114767	10
ENSG00000041880	0
ENSG00000180929	1
ENSG00000090097	1
ENSG00000114779	7
ENSG00000248487	2
ENSG00000243989	10
ENSG00000162244	8
ENSG00000164086	15
ENSG00000023330	0
ENSG00000247596	12
ENSG00000164088	7
ENSG00000164091	2
ENSG00000163930	5
ENSG00000010319	0
ENSG00000010322	13
ENSG00000010327	3
ENSG00000168268	5
ENSG00000163938	3
ENSG00000016864	1
ENSG00000114902	1
ENSG00000114904	9
ENSG00000272573	0
ENSG00000163932	7
ENSG00000163931	3
ENSG00000056736	0
ENSG00000113812	1
ENSG00000113811	8
ENSG00000163946	1
ENSG00000157500	6
ENSG00000168374	0
ENSG00000136068	1
ENSG00000163686	1
ENSG00000168297	1
ENSG00000168291	1
ENSG00000272182	1
ENSG00000168301	15
ENSG00000168309	9
ENSG00000226360	8
ENSG00000114405	0
ENSG00000163618	2
ENSG00000163630	2
ENSG00000163634	8
ENSG00000163636	0
ENSG00000163638	3
ENSG00000144749	0
ENSG00000172340	6
ENSG00000241506	6
ENSG00000163377	1
ENSG00000144747	6
ENSG00000144744	1
ENSG00000144746	0
ENSG00000114541	1
ENSG00000163412	4
ENSG00000170837	4
ENSG00000163602	1
ENSG00000163605	4
ENSG00000213300	14
ENSG00000175161	0
ENSG00000083937	1
ENSG00000163320	6
ENSG00000080200	1
ENSG00000080822	1
ENSG00000080819	1
ENSG00000036054	1
ENSG00000114021	0
ENSG00000154174	0
ENSG00000114354	1
ENSG00000138468	1
ENSG00000081154	0
ENSG00000242299	8
ENSG00000114391	8
ENSG00000244119	1
ENSG00000144815	1
ENSG00000170017	1
ENSG00000114439	1
ENSG00000196776	1
ENSG00000198919	2
ENSG00000144827	0
ENSG00000144834	2
ENSG00000091972	2
ENSG00000144848	1
ENSG00000138459	1
ENSG00000091986	9
ENSG00000163608	1
ENSG00000121579	6
ENSG00000114573	2
ENSG00000259976	0
ENSG00000172020	2
ENSG00000185565	2
ENSG00000198406	6
ENSG00000144847	1
ENSG00000113845	1
ENSG00000144837	3
ENSG00000138495	10
ENSG00000082701	2
ENSG00000163428	1
ENSG00000163430	3
ENSG00000065518	12
ENSG00000144840	1
ENSG00000180353	7
ENSG00000173230	1
ENSG00000173226	0
ENSG00000114013	7
ENSG00000114023	0
ENSG00000114030	1
ENSG00000173193	3
ENSG00000138463	1
ENSG00000173175	1
ENSG00000206527	1
ENSG00000065534	1
ENSG00000175455	1
ENSG00000082781	11
ENSG00000173706	1
ENSG00000114520	1
ENSG00000144909	6
ENSG00000114544	2
ENSG00000144908	9
ENSG00000163884	0
ENSG00000159685	10
ENSG00000114554	5
ENSG00000163870	10
ENSG00000114631	2
ENSG00000114626	0
ENSG00000074416	0
ENSG00000058262	3
ENSG00000175792	0
ENSG00000132394	0
ENSG00000163902	6
ENSG00000075785	14
ENSG00000177646	0
ENSG00000169714	0
ENSG00000181789	0
ENSG00000183624	2
ENSG00000184897	5
ENSG00000129071	4
ENSG00000004399	1
ENSG00000172765	1
ENSG00000017260	6
ENSG00000198585	4
ENSG00000114686	7
ENSG00000138246	6
ENSG00000240303	1
ENSG00000113971	1
ENSG00000081307	1
ENSG00000091527	6
ENSG00000091513	1
ENSG00000244062	1
ENSG00000144867	0
ENSG00000154917	2
ENSG00000163785	6
ENSG00000114019	1
ENSG00000129055	12
ENSG00000174579	1
ENSG00000114054	1
ENSG00000114098	4
ENSG00000158186	9
ENSG00000158234	1
ENSG00000051382	0
ENSG00000175110	0
ENSG00000184432	6
ENSG00000114115	0
ENSG00000114120	1
ENSG00000177311	6
ENSG00000114125	11
ENSG00000069849	3
ENSG00000175066	1
ENSG00000144935	1
ENSG00000163714	1
ENSG00000175040	1
ENSG00000181804	6
ENSG00000181744	1
ENSG00000152952	0
ENSG00000114698	9
ENSG00000188313	3
ENSG00000152977	0
ENSG00000163754	3
ENSG00000071794	1
ENSG00000047457	3
ENSG00000169908	3
ENSG00000018408	8
ENSG00000114744	1
ENSG00000082996	1
ENSG00000070087	0
ENSG00000224831	3
ENSG00000120742	3
ENSG00000144895	6
ENSG00000198843	1
ENSG00000181788	0
ENSG00000181631	7
ENSG00000169313	0
ENSG00000152601	6
ENSG00000114790	1
ENSG00000174953	1
ENSG00000272990	4
ENSG00000114850	6
ENSG00000163659	3
ENSG00000163660	3
ENSG00000178053	0
ENSG00000168827	1
ENSG00000118855	7
ENSG00000250588	1
ENSG00000151967	1
ENSG00000068885	1
ENSG00000186432	0
ENSG00000169255	2
ENSG00000169251	6
ENSG00000234851	8
ENSG00000114209	1
ENSG00000163536	1
ENSG00000173905	9
ENSG00000213178	8
ENSG00000008952	0
ENSG00000136603	0
ENSG00000013297	1
ENSG00000013293	1
ENSG00000163584	3
ENSG00000154310	9
ENSG00000075651	1
ENSG00000121858	0
ENSG00000177565	1
ENSG00000172667	5
ENSG00000121864	1
ENSG00000171109	1
ENSG00000269728	8
ENSG00000136518	1
ENSG00000136522	12
ENSG00000136521	0
ENSG00000114757	1
ENSG00000163728	1
ENSG00000114416	6
ENSG00000205981	1
ENSG00000242808	1
ENSG00000181449	9
ENSG00000078070	1
ENSG00000053524	2
ENSG00000240024	0
ENSG00000114796	1
ENSG00000163872	14
ENSG00000180834	1
ENSG00000175193	0
ENSG00000114770	14
ENSG00000145191	13
ENSG00000161202	1
ENSG00000161203	2
ENSG00000161204	13
ENSG00000145198	2
ENSG00000214160	11
ENSG00000145194	2
ENSG00000163888	2
ENSG00000175166	0
ENSG00000114867	3
ENSG00000175182	5
ENSG00000114859	1
ENSG00000163882	3
ENSG00000090539	0
ENSG00000177383	2
ENSG00000156931	1
ENSG00000187068	1
ENSG00000229638	8
ENSG00000163900	1
ENSG00000163904	1
ENSG00000136527	0
ENSG00000244405	0
ENSG00000090520	3
ENSG00000156976	2
ENSG00000200320	0
ENSG00000073849	7
ENSG00000127241	9
ENSG00000157005	2
ENSG00000113916	3
ENSG00000152492	6
ENSG00000198836	2
ENSG00000114315	9
ENSG00000133657	0
ENSG00000041802	0
ENSG00000114331	6
ENSG00000184203	0
ENSG00000189058	1
ENSG00000061938	2
ENSG00000072274	0
ENSG00000161217	1
ENSG00000213123	12
ENSG00000174013	4
ENSG00000163964	0
ENSG00000180370	6
ENSG00000119231	0
ENSG00000114503	4
ENSG00000270170	0
ENSG00000228109	5
ENSG00000075711	1
ENSG00000145016	5
ENSG00000122068	6
ENSG00000182899	8
ENSG00000182903	1
ENSG00000174227	1
ENSG00000133256	1
ENSG00000169020	10
ENSG00000185619	0
ENSG00000168993	2
ENSG00000178950	5
ENSG00000127419	13
ENSG00000145214	5
ENSG00000127418	1
ENSG00000159692	5
ENSG00000090316	2
ENSG00000163950	12
ENSG00000168936	1
ENSG00000068078	9
ENSG00000168924	15
ENSG00000185049	0
ENSG00000243449	10
ENSG00000185818	2
ENSG00000123933	0
ENSG00000063978	6
ENSG00000125386	0
ENSG00000168884	3
ENSG00000087274	1
ENSG00000109736	5
ENSG00000197386	13
ENSG00000163956	0
ENSG00000132406	1
ENSG00000145220	11
ENSG00000168824	2
ENSG00000168818	1
ENSG00000170891	7
ENSG00000072832	2
ENSG00000152969	2
ENSG00000109501	9
ENSG00000074211	1
ENSG00000179010	1
ENSG00000170846	1
ENSG00000178988	1
ENSG00000170871	1
ENSG00000132405	14
ENSG00000109519	11
ENSG00000184985	1
ENSG00000163995	2
ENSG00000125089	3
ENSG00000071127	3
ENSG00000157869	4
ENSG00000137449	1
ENSG00000118564	1
ENSG00000237765	4
ENSG00000169762	1
ENSG00000151552	0
ENSG00000002549	3
ENSG00000118579	8
ENSG00000163257	1
ENSG00000152990	9
ENSG00000237350	14
ENSG00000109606	1
ENSG00000109610	3
ENSG00000053900	1
ENSG00000250317	0
ENSG00000168214	1
ENSG00000251410	4
ENSG00000047365	1
ENSG00000181826	1
ENSG00000065882	3
ENSG00000109787	1
ENSG00000109790	4
ENSG00000035928	1
ENSG00000163682	0
ENSG00000121897	1
ENSG00000163683	1
ENSG00000078140	2
ENSG00000121892	6
ENSG00000163697	1
ENSG00000154277	2
ENSG00000064042	1
ENSG00000109133	1
ENSG00000014824	1
ENSG00000124406	1
ENSG00000183783	1
ENSG00000151806	1
ENSG00000260878	2
ENSG00000249936	0
ENSG00000169019	8
ENSG00000075539	1
ENSG00000109180	1
ENSG00000145247	2
ENSG00000109184	1
ENSG00000163069	1
ENSG00000109189	4
ENSG00000226950	8
ENSG00000145216	0
ENSG00000134853	0
ENSG00000128039	1
ENSG00000134851	1
ENSG00000090989	1
ENSG00000128050	9
ENSG00000174780	1
ENSG00000171476	5
ENSG00000047315	14
ENSG00000163453	3
ENSG00000243199	8
ENSG00000033178	1
ENSG00000083896	4
ENSG00000132467	1
ENSG00000018189	1
ENSG00000132463	1
ENSG00000173542	6
ENSG00000156136	1
ENSG00000080493	9
ENSG00000132466	14
ENSG00000169429	3
ENSG00000163739	3
ENSG00000081041	3
ENSG00000163743	4
ENSG00000138757	1
[truncated: 6,498 more rows]
