# Supplementary material for: Integrated systems analysis reveals conserved gene networks underlying response to spinal cord injury
Source: eLife. 2018 Oct 2;7:e39188. doi: 10.7554/eLife.39188 (PMC6173583; doi:10.7554/eLife.39188)
Supplement: Supplementary file 3. — BP, biological process; CC, cellular compartment; MF, molecular function. [file elife-39188-supp3.xlsx]

## Sheet: Module 1 BP
GOBPID

## Sheet: Module 1 CC
GOCCID

## Sheet: Module 1 MF
GOMFID

## Sheet: Module 2 BP
GOBPID

## Sheet: Module 2 CC
GOCCID

## Sheet: Module 2 MF
GOMFID

## Sheet: Module 3 BP
GOBPID

## Sheet: Module 3 CC
GOCCID

## Sheet: Module 3 MF
GOMFID

## Sheet: Module 4 BP
GOBPID

[truncated: 35 more sheets: Module 4 CC, Module 4 MF, Module 5 BP, Module 5 CC, Module 5 MF, Module 6 BP, Module 6 CC, Module 6 MF, Module 7 BP, Module 7 CC, Module 7 MF, Module 8 BP, Module 8 CC, Module 8 MF, Module 9 BP, Module 9 CC, Module 9 MF, Module 10 BP, Module 10 CC, Module 10 MF …]
