# Supplementary material for: Integrated systems analysis reveals conserved gene networks underlying response to spinal cord injury
Source: eLife. 2018 Oct 2;7:e39188. doi: 10.7554/eLife.39188 (PMC6173583; doi:10.7554/eLife.39188)
Supplement: Supplementary file 4. [file elife-39188-supp4.xlsx]

## Sheet: Dataset S4
E-GEOD-69334	GSM1698085_091113-Rat230_2-09266D_SR3-90d.CEL
E-GEOD-69334	GSM1698084_091113-Rat230_2-09266D_SR2-90d.CEL
E-GEOD-69334	GSM1698083_091113-Rat230_2-09266D_SR1-90d.CEL
E-GEOD-69334	GSM1698082_091113-Rat230_2-09266D_SR3-60d.CEL
E-GEOD-69334	GSM1698081_091113-Rat230_2-09266D_SR2-60d.CEL
E-GEOD-69334	GSM1698080_091113-Rat230_2-09266D_SR1-60d.CEL
E-GEOD-69334	GSM1698079_090930-Rat230_2-09266C_sR3_30d.CEL
E-GEOD-69334	GSM1698078_090930-Rat230_2-09266C_sR2_30d.CEL
E-GEOD-69334	GSM1698077_090930-Rat230_2-09266C_sR1_30d.CEL
E-GEOD-69334	GSM1698076_090929-Rat230_2-09266C_sR3_20d.CEL
E-GEOD-69334	GSM1698075_090929-Rat230_2-09266C_sR2_20d.CEL
E-GEOD-69334	GSM1698074_090929-Rat230_2-09266C_sR1_20d.CEL
E-GEOD-69334	GSM1698073_090828-Rat230_2-09266B_sR3-10d.CEL
E-GEOD-69334	GSM1698072_090828-Rat230_2-09266B_sR2-10d.CEL
E-GEOD-69334	GSM1698071_100108-Rat230_2-09266E_SR1-10d.CEL
E-GEOD-69334	GSM1698070_090926-Rat230_2-09266C_sR3_3d.CEL
E-GEOD-69334	GSM1698069_090926-Rat230_2-09266C_sR2_3d.CEL
E-GEOD-69334	GSM1698068_090926-Rat230_2-09266C_sR1_3d.CEL
E-GEOD-69334	GSM1698067_090929-Rat230_2-09266C_sR3_1d.CEL
E-GEOD-69334	GSM1698066_090929-Rat230_2-09266C_sR2_1d.CEL
E-GEOD-69334	GSM1698065_090929-Rat230_2-09266C_sR1_1d.CEL
E-GEOD-69334	GSM1698064_091114-Rat230_2-09266D_KR3-90d.CEL
E-GEOD-69334	GSM1698063_091114-Rat230_2-09266D_KR2-90d.CEL
E-GEOD-69334	GSM1698062_091114-Rat230_2-09266D_KR1-90d.CEL
E-GEOD-69334	GSM1698061_091113-Rat230_2-09266D_KR3-60d.CEL
E-GEOD-69334	GSM1698060_091113-Rat230_2-09266D_KR2-60d.CEL
E-GEOD-69334	GSM1698059_091113-Rat230_2-09266D_KR1-60d.CEL
E-GEOD-69334	GSM1698058_090930-Rat230_2-09266C_kR3_30d.CEL
E-GEOD-69334	GSM1698057_090930-Rat230_2-09266C_kR2_30d.CEL
E-GEOD-69334	GSM1698056_090930-Rat230_2-09266C_kR1_30d.CEL
E-GEOD-69334	GSM1698055_090930-Rat230_2-09266C_kR3_20d.CEL
E-GEOD-69334	GSM1698054_090930-Rat230_2-09266C_kR2_20d.CEL
E-GEOD-69334	GSM1698053_091010-Rat230_2-09266C_kR1_20d.CEL
E-GEOD-69334	GSM1698052_090828-Rat230_2-09266B_kr2-10d.CEL
E-GEOD-69334	GSM1698051_090828-Rat230_2-09266B_kr1-10d.CEL
E-GEOD-69334	GSM1698050_090729-Rat230_2-09266A_KR3-3d.CEL
E-GEOD-69334	GSM1698049_090729-Rat230_2-09266A_KR2-3d.CEL
E-GEOD-69334	GSM1698048_090729-Rat230_2-09266A_KR1-3d.CEL
E-GEOD-69334	GSM1698047_090929-Rat230_2-09266C_kR3_1d.CEL
E-GEOD-69334	GSM1698046_090929-Rat230_2-09266C_kR2_1d.CEL
E-GEOD-69334	GSM1698045_090929-Rat230_2-09266C_kR1_1d.CEL
E-GEOD-69334	GSM1698044_091113-Rat230_2-09266D_dR3-90d.CEL
E-GEOD-69334	GSM1698043_091113-Rat230_2-09266D_dR2-90d.CEL
E-GEOD-69334	GSM1698042_091113-Rat230_2-09266D_dR1-90d.CEL
E-GEOD-69334	GSM1698041_091113-Rat230_2-09266D_dR3-60d.CEL
E-GEOD-69334	GSM1698040_091113-Rat230_2-09266D_dR2-60d.CEL
E-GEOD-69334	GSM1698039_091113-Rat230_2-09266D_dR1-60d.CEL
E-GEOD-69334	GSM1698038_090930-Rat230_2-09266C_dR3_30d.CEL
E-GEOD-69334	GSM1698037_090930-Rat230_2-09266C_dR2_30d.CEL
E-GEOD-69334	GSM1698036_090930-Rat230_2-09266C_dR1_30d.CEL
E-GEOD-69334	GSM1698035_090929-Rat230_2-09266C_dR3_20d.CEL
E-GEOD-69334	GSM1698034_090929-Rat230_2-09266C_dR2_20d.CEL
E-GEOD-69334	GSM1698033_090929-Rat230_2-09266C_dR1_20d.CEL
E-GEOD-69334	GSM1698032_090828-Rat230_2-09266B_dR3-10d.CEL
E-GEOD-69334	GSM1698031_090828-Rat230_2-09266B_dR2-10d.CEL
E-GEOD-69334	GSM1698030_090828-Rat230_2-09266B_dR1-10d.CEL
E-GEOD-69334	GSM1698029_090926-Rat230_2-09266C_dR3_3d.CEL
E-GEOD-69334	GSM1698028_090926-Rat230_2-09266C_dR2_3d.CEL
E-GEOD-69334	GSM1698027_090926-Rat230_2-09266C_dR1_3d.CEL
E-GEOD-69334	GSM1698026_090729-Rat230_2-09266A_dR3-d.CEL
E-GEOD-69334	GSM1698025_090729-Rat230_2-09266A_dR2-d.CEL
E-GEOD-69334	GSM1698024_090729-Rat230_2-09266A_dR1-d.CEL
E-GEOD-69334	GSM1698023_090729-Rat230_2-09266A_nor3.CEL
E-GEOD-69334	GSM1698022_090729-Rat230_2-09266A_nor2.CEL
E-GEOD-69334	GSM1698021_090729-Rat230_2-09266A_nor1.CEL
E-GEOD-69334	GSM1698020_091114-Rat230_2-09266D_SM3-90d.CEL
E-GEOD-69334	GSM1698019_091114-Rat230_2-09266D_SM2-90d.CEL
E-GEOD-69334	GSM1698018_091114-Rat230_2-09266D_SM1-90d.CEL
E-GEOD-69334	GSM1698017_091113-Rat230_2-09266D_SM3-60d.CEL
E-GEOD-69334	GSM1698016_091113-Rat230_2-09266D_SM2-60d.CEL
E-GEOD-69334	GSM1698015_091113-Rat230_2-09266D_SM1-60d.CEL
E-GEOD-69334	GSM1698014_090930-Rat230_2-09266C_sM3_30d.CEL
E-GEOD-69334	GSM1698013_090930-Rat230_2-09266C_sM2_30d.CEL
E-GEOD-69334	GSM1698012_090930-Rat230_2-09266C_sM1_30d.CEL
E-GEOD-69334	GSM1698011_100413-Rat230_2-09363E_SM5-20d.CEL
E-GEOD-69334	GSM1698010_090929-Rat230_2-09266C_sM3_20d.CEL
E-GEOD-69334	GSM1698009_090929-Rat230_2-09266C_sM2_20d.CEL
E-GEOD-69334	GSM1698008_090828-Rat230_2-09266B_sm3-10d.CEL
E-GEOD-69334	GSM1698007_090828-Rat230_2-09266B_sm2-10d.CEL
E-GEOD-69334	GSM1698006_100108-Rat230_2-09266E_SM1-10d.CEL
E-GEOD-69334	GSM1698005_090926-Rat230_2-09266C_sM3_3d.CEL
E-GEOD-69334	GSM1698004_090926-Rat230_2-09266C_sM2_3d.CEL
E-GEOD-69334	GSM1698003_090926-Rat230_2-09266C_sM1_3d.CEL
E-GEOD-69334	GSM1698002_090729-Rat230_2-09266A_KM3-3d.CEL
E-GEOD-69334	GSM1698001_090729-Rat230_2-09266A_KM2-3d.CEL
E-GEOD-69334	GSM1698000_090729-Rat230_2-09266A_KM1-3d.CEL
E-GEOD-69334	GSM1697999_091113-Rat230_2-09266D_dM3-90d.CEL
E-GEOD-69334	GSM1697998_091113-Rat230_2-09266D_dM2-90d.CEL
E-GEOD-69334	GSM1697997_091120-Rat230_2-09266D_dM1-90d.CEL
E-GEOD-69334	GSM1697996_091113-Rat230_2-09266D_dM3-60d.CEL
E-GEOD-69334	GSM1697995_091113-Rat230_2-09266D_dM2-60d.CEL
E-GEOD-69334	GSM1697994_091113-Rat230_2-09266D_dM1-60d.CEL
E-GEOD-69334	GSM1697993_090930-Rat230_2-09266C_dM3_30d.CEL
E-GEOD-69334	GSM1697992_090930-Rat230_2-09266C_dM2_30d.CEL
E-GEOD-69334	GSM1697991_090930-Rat230_2-09266C_dM1_30d.CEL
E-GEOD-69334	GSM1697990_090929-Rat230_2-09266C_dM3_20d.CEL
E-GEOD-69334	GSM1697989_090929-Rat230_2-09266C_dM2_20d.CEL
E-GEOD-69334	GSM1697988_090929-Rat230_2-09266C_dM1_20d.CEL
E-GEOD-69334	GSM1697987_090828-Rat230_2-09266B_dM3-10d.CEL
E-GEOD-69334	GSM1697986_090828-Rat230_2-09266B_dM2-10d.CEL
E-GEOD-69334	GSM1697985_090828-Rat230_2-09266B_dM1-10d.CEL
E-GEOD-69334	GSM1697984_090926-Rat230_2-09266C_dM3_3d.CEL
E-GEOD-69334	GSM1697983_090926-Rat230_2-09266C_dM2_3d.CEL
E-GEOD-69334	GSM1697982_090926-Rat230_2-09266C_dM1_3d.CEL
E-GEOD-69334	GSM1697981_091114-Rat230_2-09266D_SC3-90d.CEL
E-GEOD-69334	GSM1697980_091114-Rat230_2-09266D_SC2-90d.CEL
E-GEOD-69334	GSM1697979_091114-Rat230_2-09266D_SC1-90d.CEL
E-GEOD-69334	GSM1697978_091113-Rat230_2-09266D_SC3-60d.CEL
E-GEOD-69334	GSM1697977_091120-Rat230_2-09266D_SC2-60d.CEL
E-GEOD-69334	GSM1697976_091113-Rat230_2-09266D_SC1-60d.CEL
E-GEOD-69334	GSM1697975_090930-Rat230_2-09266C_sC3_30d.CEL
E-GEOD-69334	GSM1697974_090930-Rat230_2-09266C_sC2_30d.CEL
E-GEOD-69334	GSM1697973_090930-Rat230_2-09266C_sC1_30d.CEL
E-GEOD-69334	GSM1697972_090929-Rat230_2-09266C_sC3_20d.CEL
E-GEOD-69334	GSM1697971_090929-Rat230_2-09266C_sC2_20d.CEL
E-GEOD-69334	GSM1697970_090929-Rat230_2-09266C_sC1_20d.CEL
E-GEOD-69334	GSM1697969_090828-Rat230_2-09266B_sc3-10d.CEL
E-GEOD-69334	GSM1697968_090828-Rat230_2-09266B_sc2-10d.CEL
E-GEOD-69334	GSM1697967_100108-Rat230_2-09266E_SC1-10d.CEL
E-GEOD-69334	GSM1697966_090926-Rat230_2-09266C_sC3_3d.CEL
E-GEOD-69334	GSM1697965_090926-Rat230_2-09266C_sC2_3d.CEL
E-GEOD-69334	GSM1697964_090926-Rat230_2-09266C_sC1_3d.CEL
E-GEOD-69334	GSM1697963_090929-Rat230_2-09266C_sC3_1d.CEL
E-GEOD-69334	GSM1697962_090929-Rat230_2-09266C_sC2_1d.CEL
E-GEOD-69334	GSM1697961_090929-Rat230_2-09266C_sC1_1d.CEL
E-GEOD-69334	GSM1697960_091114-Rat230_2-09266D_KC3-90d.CEL
E-GEOD-69334	GSM1697959_091114-Rat230_2-09266D_KC2-90d.CEL
E-GEOD-69334	GSM1697958_091114-Rat230_2-09266D_KC1-90d.CEL
E-GEOD-69334	GSM1697957_091113-Rat230_2-09266D_KC3-60d.CEL
E-GEOD-69334	GSM1697956_091113-Rat230_2-09266D_KC2-60d.CEL
E-GEOD-69334	GSM1697955_091113-Rat230_2-09266D_KC1-60d.CEL
E-GEOD-69334	GSM1697954_090930-Rat230_2-09266C_kC3_30d.CEL
E-GEOD-69334	GSM1697953_090930-Rat230_2-09266C_kC2_30d.CEL
E-GEOD-69334	GSM1697952_090930-Rat230_2-09266C_kC1_30d.CEL
E-GEOD-69334	GSM1697951_090930-Rat230_2-09266C_kC3_20d.CEL
E-GEOD-69334	GSM1697950_090930-Rat230_2-09266C_kC2_20d.CEL
E-GEOD-69334	GSM1697949_090930-Rat230_2-09266C_kC1_20d.CEL
E-GEOD-69334	GSM1697948_090828-Rat230_2-09266B_kc3-10d.CEL
E-GEOD-69334	GSM1697947_090828-Rat230_2-09266B_kc2-10d.CEL
E-GEOD-69334	GSM1697946_090828-Rat230_2-09266B_kc1-10d.CEL
E-GEOD-69334	GSM1697945_090729-Rat230_2-09266A_kC3-3d.CEL
E-GEOD-69334	GSM1697944_090729-Rat230_2-09266A_kC2-3d.CEL
E-GEOD-69334	GSM1697943_090729-Rat230_2-09266A_kC1-3d.CEL
E-GEOD-69334	GSM1697942_090929-Rat230_2-09266C_kC3_1d.CEL
E-GEOD-69334	GSM1697941_090929-Rat230_2-09266C_kC2_1d.CEL
E-GEOD-69334	GSM1697940_090929-Rat230_2-09266C_kC1_1d.CEL
E-GEOD-69334	GSM1697939_091114-Rat230_2-09266D_dC3-90d.CEL
E-GEOD-69334	GSM1697938_091114-Rat230_2-09266D_dC2-90d.CEL
E-GEOD-69334	GSM1697937_091114-Rat230_2-09266D_dC1-90d.CEL
E-GEOD-69334	GSM1697936_091114-Rat230_2-09266D_dC3-60d.CEL
E-GEOD-69334	GSM1697935_091114-Rat230_2-09266D_dC2-60d.CEL
E-GEOD-69334	GSM1697934_091114-Rat230_2-09266D_dC1-60d.CEL
E-GEOD-69334	GSM1697933_090930-Rat230_2-09266C_dC3_30d.CEL
E-GEOD-69334	GSM1697932_090930-Rat230_2-09266C_dC2_30d.CEL
E-GEOD-69334	GSM1697931_090930-Rat230_2-09266C_dC1_30d.CEL
E-GEOD-69334	GSM1697930_090929-Rat230_2-09266C_dC3_20d.CEL
E-GEOD-69334	GSM1697929_090929-Rat230_2-09266C_dC2_20d.CEL
E-GEOD-69334	GSM1697928_090929-Rat230_2-09266C_dC1_20d.CEL
E-GEOD-69334	GSM1697927_090828-Rat230_2-09266B_dC3-10d.CEL
E-GEOD-69334	GSM1697926_090828-Rat230_2-09266B_dC2-10d.CEL
E-GEOD-69334	GSM1697925_090926-Rat230_2-09266C_dC3_3d.CEL
E-GEOD-69334	GSM1697924_090926-Rat230_2-09266C_dC2_3d.CEL
E-GEOD-69334	GSM1697923_090926-Rat230_2-09266C_dC1_3d.CEL
E-GEOD-69334	GSM1697922_090729-Rat230_2-09266A_dC3-d.CEL
E-GEOD-69334	GSM1697921_090729-Rat230_2-09266A_dC2-d.CEL
E-GEOD-69334	GSM1697920_090729-Rat230_2-09266A_dC1-d.CEL
E-GEOD-69334	GSM1697919_090828-Rat230_2-09266B_dC1-10d.CEL
E-GEOD-52763	GSM1275687_sham_+_TM_10F10_.CEL
E-GEOD-52763	GSM1275686_sham_+_TM_10F09_.CEL
E-GEOD-52763	GSM1275685_sham_+_TM_10F08_.CEL
E-GEOD-52763	GSM1275684_3W_injury_+_TM_10F07_.CEL
E-GEOD-52763	GSM1275683_3W_injury_+_TM_10F06_.CEL
E-GEOD-52763	GSM1275682_3W_injury_+_TM_10F02_.CEL
E-GEOD-52763	GSM1275681_3W_injury_+_TM_10F01_.CEL
E-GEOD-52763	GSM1275680_3W_injury_only_10J2_.CEL
E-GEOD-52763	GSM1275679_3W_injury_only_10J1_.CEL
E-GEOD-52763	GSM1275678_3W_injury_only_10F04_.CEL
E-GEOD-52763	GSM1275677_3W_injury_only_10F03_.CEL
E-GEOD-52763	GSM1275676_1W_injury_only_10J8_.CEL
E-GEOD-52763	GSM1275675_1W_injury_only_10J7_.CEL
E-GEOD-52763	GSM1275674_1W_injury_only_10G02_.CEL
E-GEOD-52763	GSM1275673_1W_injury_only_10G01_.CEL
E-GEOD-52763	GSM1275672_1W_sham_10G06_.CEL
E-GEOD-52763	GSM1275671_1W_sham_10G05_.CEL
E-GEOD-52763	GSM1275670_1W_sham_10G04_.CEL
E-GEOD-45006	GSM1095744_MF24_M36.CEL
E-GEOD-45006	GSM1095743_MF23_M35.CEL
E-GEOD-45006	GSM1095742_MF22_M34.CEL
E-GEOD-45006	GSM1095741_MF21_M32.CEL
E-GEOD-45006	GSM1095740_MF20_M31.CEL
E-GEOD-45006	GSM1095739_MF19_M30.CEL
E-GEOD-45006	GSM1095738_MF18_M29.CEL
E-GEOD-45006	GSM1095737_MF17_M28.CEL
E-GEOD-45006	GSM1095736_MF16_M26.CEL
E-GEOD-45006	GSM1095735_MF15_M25.CEL
E-GEOD-45006	GSM1095734_MF14_M24.CEL
E-GEOD-45006	GSM1095733_MF13_M23.CEL
E-GEOD-45006	GSM1095732_MF12_M20.CEL
E-GEOD-45006	GSM1095731_MF11_M19.CEL
E-GEOD-45006	GSM1095730_MF10_M18.CEL
E-GEOD-45006	GSM1095729_MF09_M17.CEL
E-GEOD-45006	GSM1095728_MF08_M16.CEL
E-GEOD-45006	GSM1095727_MF07_M15.CEL
E-GEOD-45006	GSM1095726_MF06_M13.CEL
E-GEOD-45006	GSM1095725_MF05_M12.CEL
E-GEOD-45006	GSM1095724_MF04_M6.CEL
E-GEOD-45006	GSM1095723_MF03_M5.CEL
E-GEOD-45006	GSM1095722_MF02_M4.CEL
E-GEOD-45006	GSM1095721_MF01_M3.CEL
E-GEOD-27212	GSM672363.CEL
E-GEOD-27212	GSM672362.CEL
E-GEOD-27212	GSM672361.CEL
E-GEOD-27212	GSM672360.CEL
E-GEOD-27212	GSM672359.CEL
E-GEOD-27212	GSM672358.CEL
E-GEOD-22791	GSM563501.CEL
E-GEOD-22791	GSM563500.CEL
E-GEOD-22791	GSM563499.CEL
E-GEOD-22791	GSM563498.CEL
E-GEOD-22791	GSM563497.CEL
E-GEOD-22791	GSM563496.CEL
E-GEOD-22791	GSM563495.CEL
E-GEOD-16710	GSM418683.CEL
E-GEOD-16710	GSM418682.CEL
E-GEOD-16710	GSM418681.CEL
E-GEOD-16710	GSM418680.CEL
E-GEOD-16710	GSM418679.CEL
E-GEOD-16710	GSM418678.CEL
E-GEOD-16710	GSM418677.CEL
E-GEOD-16710	GSM418676.CEL
E-GEOD-16710	GSM418675.CEL
E-GEOD-16710	GSM418674.CEL
E-GEOD-16710	GSM418673.CEL
E-GEOD-16710	GSM418672.CEL
E-GEOD-16710	GSM418671.CEL
E-GEOD-16710	GSM418670.CEL
E-GEOD-16710	GSM418669.CEL
E-GEOD-16710	GSM418668.CEL
E-GEOD-16710	GSM418667.CEL
E-GEOD-16710	GSM418666.CEL
E-GEOD-16710	GSM418665.CEL
E-GEOD-16710	GSM418664.CEL
E-GEOD-16710	GSM418663.CEL
E-GEOD-16710	GSM418662.CEL
E-GEOD-16710	GSM418661.CEL
E-GEOD-16710	GSM418660.CEL
E-GEOD-16710	GSM418659.CEL
E-GEOD-16710	GSM418658.CEL
E-GEOD-16710	GSM418657.CEL
E-GEOD-4037	GSM92490.cel
E-GEOD-4037	GSM92494.cel
E-GEOD-4037	GSM92502.cel
E-GEOD-4037	GSM92499.cel
E-GEOD-4037	GSM92493.cel
E-GEOD-4037	GSM92497.cel
E-GEOD-4037	GSM92491.cel
E-GEOD-4037	GSM92505.cel
E-GEOD-4037	GSM92489.cel
E-GEOD-4037	GSM92500.cel
E-GEOD-4037	GSM92503.cel
E-GEOD-4037	GSM92488.cel
E-GEOD-4037	GSM92495.cel
E-GEOD-4037	GSM92496.cel
E-GEOD-4037	GSM92492.cel
E-GEOD-4037	GSM92501.cel
E-GEOD-4037	GSM92498.cel
E-GEOD-4037	GSM92504.cel
E-GEOD-52139	GSM1260249_16_MS301N.CEL
E-GEOD-52139	GSM1260248_15_MS301P.CEL
E-GEOD-52139	GSM1260247_14_MS166N.CEL
E-GEOD-52139	GSM1260246_13_MS166P.CEL
E-GEOD-52139	GSM1260245_12_MS402N.CEL
E-GEOD-52139	GSM1260244_11_MS402P.CEL
E-GEOD-52139	GSM1260243_10_MS157N.CEL
E-GEOD-52139	GSM1260242_09_MS157P.CEL
E-GEOD-52139	GSM1260241_08_MS403N.CEL
E-GEOD-52139	GSM1260240_07_MS403P.CEL
E-GEOD-52139	GSM1260239_06_MS341N.CEL
E-GEOD-52139	GSM1260238_05_MS341P.CEL
E-GEOD-52139	GSM1260237_04_MS413N.CEL
E-GEOD-52139	GSM1260236_03_MS413P.CEL
E-GEOD-52139	GSM1260235_02_MS207N.CEL
E-GEOD-52139	GSM1260234_01_MS207P.CEL
E-GEOD-7307	GSM176074.CEL
E-GEOD-7307	GSM175868.CEL
E-GEOD-7307	GSM175865.CEL
E-GEOD-7307	GSM175867.CEL
E-GEOD-7307	GSM175866.CEL
E-GEOD-7307	GSM176057.CEL
E-GEOD-7307	GSM176209.CEL
E-GEOD-7307	GSM175936.CEL
E-GEOD-7307	GSM176208.CEL
E-GEOD-3526	GSM80795.CEL
E-GEOD-3526	GSM80798.CEL
E-GEOD-3526	GSM80786.CEL
E-GEOD-3526	GSM80784.CEL
E-GEOD-3526	GSM80799.CEL
E-GEOD-3526	GSM80787.CEL
E-GEOD-3526	GSM80785.CEL
E-GEOD-3526	GSM80794.CEL
E-GEOD-42828	GSM1050919_S34-D0KO04.CEL
E-GEOD-42828	GSM1050918_S33-D0KO03.CEL
E-GEOD-42828	GSM1050917_S32-D0KO02.CEL
E-GEOD-42828	GSM1050916_S31-D0KO01.CEL
E-GEOD-42828	GSM1050915_S30-D0WT04.CEL
E-GEOD-42828	GSM1050914_S29-D0WT03.CEL
E-GEOD-42828	GSM1050913_S28-D0WT02.CEL
E-GEOD-42828	GSM1050912_S27-D0WT01.CEL
E-GEOD-42828	GSM1050911_S26-D7KO30.CEL
E-GEOD-42828	GSM1050910_S25-D7KO29.CEL
E-GEOD-42828	GSM1050909_S24-D7KO28.CEL
E-GEOD-42828	GSM1050908_S23-D7KO27.CEL
E-GEOD-42828	GSM1050907_S22-D7WT43.CEL
E-GEOD-42828	GSM1050906_S21-D7WT31.CEL
E-GEOD-42828	GSM1050905_S20-D7WT29.CEL
E-GEOD-42828	GSM1050904_S19-D7WT28.CEL
E-GEOD-42828	GSM1050903_S18-D3KO39.CEL
E-GEOD-42828	GSM1050902_S17-D3KO34.CEL
E-GEOD-42828	GSM1050901_S16-D3KO33.CEL
E-GEOD-42828	GSM1050900_S15-D3KO32.CEL
E-GEOD-42828	GSM1050899_S14-D3KO31.CEL
E-GEOD-42828	GSM1050898_S13-D3WT35.CEL
E-GEOD-42828	GSM1050897_S12-D3WT34.CEL
E-GEOD-42828	GSM1050896_S11-D3WT33.CEL
E-GEOD-42828	GSM1050895_S10-D3WT32.CEL
E-GEOD-42828	GSM1050894_S09-D1KO38.CEL
E-GEOD-42828	GSM1050893_S08-D1KO37.CEL
E-GEOD-42828	GSM1050892_S07-D1KO36.CEL
E-GEOD-42828	GSM1050891_S06-D1KO35.CEL
E-GEOD-42828	GSM1050890_S05-D1WT42.CEL
E-GEOD-42828	GSM1050889_S04-D1WT39.CEL
E-GEOD-42828	GSM1050888_S03-D1WT38.CEL
E-GEOD-42828	GSM1050887_S02-D1WT37.CEL
E-GEOD-42828	GSM1050886_S01-D1WT36.CEL
E-GEOD-74680	GSM1929856_283_R.CEL
E-GEOD-74680	GSM1929854_283_C.CEL
E-GEOD-74680	GSM1929853_282_R.CEL
E-GEOD-74680	GSM1929850_282_C.CEL
E-GEOD-74680	GSM1929849_281_R.CEL
E-GEOD-74680	GSM1929847_281_C.CEL
E-GEOD-74680	GSM1929845_280_R.CEL
E-GEOD-74680	GSM1929843_280_C.CEL
E-GEOD-74680	GSM1929841_279_R.CEL
E-GEOD-74680	GSM1929840_279_C.CEL
E-GEOD-74680	GSM1929839_278_R.CEL
E-GEOD-74680	GSM1929838_278_C.CEL
E-GEOD-74680	GSM1929836_277_R.CEL
E-GEOD-74680	GSM1929835_276_R.CEL
E-GEOD-74680	GSM1929833_274_R.CEL
E-GEOD-74680	GSM1929831_274_C.CEL
E-GEOD-74680	GSM1929829_273_R.CEL
E-GEOD-74680	GSM1929827_273_C.CEL
E-GEOD-74680	GSM1929826_272_R.CEL
E-GEOD-74680	GSM1929824_272_C.CEL
E-GEOD-74680	GSM1929823_271_R.CEL
E-GEOD-74680	GSM1929821_271_C.CEL
E-GEOD-46298	GSM1128358_ENDSTAGE.C57_C.3258.CEL
E-GEOD-46298	GSM1128357_ENDSTAGE.C57_C.3261.CEL
E-GEOD-46298	GSM1128356_ENDSTAGE.C57_C.3256.CEL
E-GEOD-46298	GSM1128355_ENDSTAGE.C57_C.3254.CEL
E-GEOD-46298	GSM1128354_ENDSTAGE.C57_G.3252.CEL
E-GEOD-46298	GSM1128353_ENDSTAGE.C57_G.3259.CEL
E-GEOD-46298	GSM1128352_ENDSTAGE.C57_G.3260.CEL
E-GEOD-46298	GSM1128351_ENDSTAGE.C57_G.3253.CEL
E-GEOD-46298	GSM1128350_ENDSTAGE.129SV_C.3357.CEL
E-GEOD-46298	GSM1128349_ENDSTAGE.129SV_C.3383.CEL
E-GEOD-46298	GSM1128348_ENDSTAGE.129SV_C.3368.CEL
E-GEOD-46298	GSM1128347_ENDSTAGE.129SV_C.3387.CEL
E-GEOD-46298	GSM1128346_ENDSTAGE.129SV_G.3365.CEL
E-GEOD-46298	GSM1128345_ENDSTAGE.129SV_G.3399.CEL
E-GEOD-46298	GSM1128344_ENDSTAGE.129SV_G.3376.CEL
E-GEOD-46298	GSM1128343_ENDSTAGE.129SV_G.3388.CEL
E-GEOD-46298	GSM1128342_C57.SYMPT_C.534.CEL
E-GEOD-46298	GSM1128341_C57.SYMPT_C.520.CEL
E-GEOD-46298	GSM1128340_C57.SYMPT_C.524.CEL
E-GEOD-46298	GSM1128339_C57.SYMPT_C.543.CEL
E-GEOD-46298	GSM1128338_C57.SYMPT_G.545.CEL
E-GEOD-46298	GSM1128337_C57.SYMPT_G.532.CEL
E-GEOD-46298	GSM1128336_C57.SYMPT_G.523.CEL
E-GEOD-46298	GSM1128335_C57.SYMPT_G.544.CEL
E-GEOD-46298	GSM1128334_129sv.SYMPT_C.1305.CEL
E-GEOD-46298	GSM1128333_129sv.SYMPT_C.1309.CEL
E-GEOD-46298	GSM1128332_129sv.SYMPT_C.1328.CEL
E-GEOD-46298	GSM1128331_129sv.SYMPT_C.1331.CEL
E-GEOD-46298	GSM1128330_129sv.SYMPT_G93A.1330.CEL
E-GEOD-46298	GSM1128329_129sv.SYMPT_G93A.1327.CEL
E-GEOD-46298	GSM1128328_129sv.SYMPT_G93A.1306.CEL
E-GEOD-46298	GSM1128327_129sv.SYMPT_G93A.1308.CEL
E-GEOD-46298	GSM1128326_C57.ONSET_C1481.CEL
E-GEOD-46298	GSM1128325_C57.ONSET_C1478.CEL
E-GEOD-46298	GSM1128324_C57.ONSET_C1408.CEL
E-GEOD-46298	GSM1128323_C57.ONSET_C1455.CEL
E-GEOD-46298	GSM1128322_C57.ONSET_G1483.CEL
E-GEOD-46298	GSM1128321_C57.ONSET_G1482.CEL
E-GEOD-46298	GSM1128320_C57.ONSET_G1454.CEL
E-GEOD-46298	GSM1128319_C57.ONSET_G1409.CEL
E-GEOD-46298	GSM1128318_129sv.ONSET_C.1357.2.CEL
E-GEOD-46298	GSM1128317_129sv.ONSET_C.1372.CEL
E-GEOD-46298	GSM1128316_129sv.ONSET_C.1396.CEL
E-GEOD-46298	GSM1128315_129sv.ONSET_C.1390.2.CEL
E-GEOD-46298	GSM1128314_129sv.ONSET_G.1373.CEL
E-GEOD-46298	GSM1128313_129sv.ONSET_G.1395.CEL
E-GEOD-46298	GSM1128312_129sv.ONSET_G.1391.CEL
E-GEOD-46298	GSM1128311_129sv.ONSET_G.1358.CEL
E-GEOD-46298	GSM1128310_C57-PRESYMPT_C.2471.CEL
E-GEOD-46298	GSM1128309_C57-PRESYMPT_C.2472.CEL
E-GEOD-46298	GSM1128308_C57-PRESYMPT_C.2475.CEL
E-GEOD-46298	GSM1128307_C57-PRESYMPT_C.2463.CEL
E-GEOD-46298	GSM1128306_C57-PRESYMPT_G93A.2496.CEL
E-GEOD-46298	GSM1128305_C57-PRESYMPT_G93A.2461.CEL
E-GEOD-46298	GSM1128304_C57-PRESYMPT_G93A.2494.CEL
E-GEOD-46298	GSM1128303_C57-PRESYMPT_G93A.2493.CEL
E-GEOD-46298	GSM1128302_129Sv.PRESYMPT_C.2519.CEL
E-GEOD-46298	GSM1128301_129Sv.PRESYMPT_C.2518.CEL
E-GEOD-46298	GSM1128300_129Sv.PRESYMPT_C.2517.CEL
E-GEOD-46298	GSM1128299_129Sv.PRESYMPT_C.2505.CEL
E-GEOD-46298	GSM1128298_129Sv.PRESYMPT_G.2512.CEL
E-GEOD-46298	GSM1128297_129Sv.PRESYMPT_G.2503.CEL
E-GEOD-46298	GSM1128296_129Sv.PRESYMPT_G.2520.CEL
E-GEOD-46298	GSM1128295_129Sv.PRESYMPT_G.2513.CEL
E-GEOD-47681	GSM1154553_Dorsey_Mouse430-S34_9-D1KO38.CEL
E-GEOD-47681	GSM1154552_Dorsey_Mouse430-S34_8-D1KO37.CEL
E-GEOD-47681	GSM1154551_Dorsey_Mouse430-S34_7-D1KO36.CEL
E-GEOD-47681	GSM1154550_Dorsey_Mouse430-S34_6-D1KO35.CEL
E-GEOD-47681	GSM1154549_Dorsey_Mouse430-S34_5-D1WT42.CEL
E-GEOD-47681	GSM1154548_Dorsey_Mouse430-S34_4-D1WT39.CEL
E-GEOD-47681	GSM1154547_Dorsey_Mouse430-S34_3-D1WT38.CEL
E-GEOD-47681	GSM1154546_Dorsey-Mouse430-S34_34NavKO4.CEL
E-GEOD-47681	GSM1154545_Dorsey-Mouse430-S34_33NavKO3.CEL
E-GEOD-47681	GSM1154544_Dorsey-Mouse430-S34_32NavKO2.CEL
E-GEOD-47681	GSM1154543_Dorsey-Mouse430-S34_31NavKO1.CEL
E-GEOD-47681	GSM1154542_Dorsey-Mouse430-S34_30NavWT4.CEL
E-GEOD-47681	GSM1154541_Dorsey_Mouse430-S34_2-D1WT37.CEL
E-GEOD-47681	GSM1154540_Dorsey-Mouse430-S34_29NavWT3.CEL
E-GEOD-47681	GSM1154539_Dorsey-Mouse430-S34_28NavWT2.CEL
E-GEOD-47681	GSM1154538_Dorsey-Mouse430-S34_27NavWT1.CEL
E-GEOD-47681	GSM1154537_Dorsey_Mouse430-S34_26-D7KO30.CEL
E-GEOD-47681	GSM1154536_Dorsey_Mouse430-S34_25-D7KO29.CEL
E-GEOD-47681	GSM1154535_Dorsey_Mouse430-S34_24-D7KO28.CEL
E-GEOD-47681	GSM1154534_Dorsey_Mouse430-S34_23-D7KO27.CEL
E-GEOD-47681	GSM1154533_Dorsey_Mouse430-S34_22-D7WT43.CEL
E-GEOD-47681	GSM1154532_Dorsey_Mouse430-S34_21-D7WT31.CEL
E-GEOD-47681	GSM1154531_Dorsey_Mouse430-S34_20-D7WT29.CEL
E-GEOD-47681	GSM1154530_Dorsey_Mouse430-S34_1-D1WT36.CEL
E-GEOD-47681	GSM1154529_Dorsey_Mouse430-S34_19-D7WT28.CEL
E-GEOD-47681	GSM1154528_Dorsey_Mouse430-S34_18-D3KO39.CEL
E-GEOD-47681	GSM1154527_Dorsey_Mouse430-S34_17-D3KO34.CEL
E-GEOD-47681	GSM1154526_Dorsey_Mouse430-S34_16-D3KO33.CEL
E-GEOD-47681	GSM1154525_Dorsey_Mouse430-S34_15-D3KO32.CEL
E-GEOD-47681	GSM1154524_Dorsey_Mouse430-S34_14-D3KO31.CEL
E-GEOD-47681	GSM1154523_Dorsey_Mouse430-S34_13-D3WT35.CEL
E-GEOD-47681	GSM1154522_Dorsey_Mouse430-S34_12-D3WT34.CEL
E-GEOD-47681	GSM1154521_Dorsey_Mouse430-S34_11-D3WT33.CEL
E-GEOD-47681	GSM1154520_Dorsey_Mouse430-S34_10-D3WT32.CEL
E-GEOD-39865	GSM980531_G030061_01.CEL
E-GEOD-39865	GSM980530_G030061_18.CEL
E-GEOD-39865	GSM980529_G030061_17.CEL
E-GEOD-39865	GSM980528_G030061_04.CEL
E-GEOD-39865	GSM980527_G030061_03.CEL
E-GEOD-39865	GSM980526_G030061_02.CEL
E-GEOD-39865	GSM980525_G030061_12.CEL
E-GEOD-39865	GSM980524_G030061_11.CEL
E-GEOD-39865	GSM980523_G030061_10.CEL
E-GEOD-39865	GSM980522_G030061_09.CEL
E-GEOD-39865	GSM980521_G030061_08.CEL
E-GEOD-39865	GSM980520_G030061_07.CEL
E-GEOD-39865	GSM980519_G030061_16.CEL
E-GEOD-39865	GSM980518_G030061_06.CEL
E-GEOD-39865	GSM980517_G030061_05.CEL
E-GEOD-39865	GSM980516_G030061_15.CEL
E-GEOD-39865	GSM980515_G030061_14.CEL
E-GEOD-39865	GSM980514_G030061_13.CEL
E-GEOD-39865	GSM980513_G030061_21.CEL
E-GEOD-39865	GSM980512_G030061_20.CEL
E-GEOD-39865	GSM980511_G030061_19.CEL
E-GEOD-11276	GSM284832_NogoAKO_C57Bl6_SpinalCord_3.CEL
E-GEOD-11276	GSM284831_NogoAKO_C57Bl6_SpinalCord_2.CEL
E-GEOD-11276	GSM284830_NogoAKO_C57Bl6_SpinalCord_1.CEL
E-GEOD-11276	GSM284829_WT_C57Bl6_SpinalCord_3.CEL
E-GEOD-11276	GSM284828_WT_C57Bl6_Spinalcord_2.CEL
E-GEOD-11276	GSM284827_WT_C57Bl6_SpinalCord_1.CEL
E-GEOD-19474	GSM485241.CEL
E-GEOD-19474	GSM485239.CEL
E-GEOD-19474	GSM485242.CEL
E-GEOD-19474	GSM485249.CEL
E-GEOD-19474	GSM485240.CEL
E-GEOD-19474	GSM485248.CEL
E-GEOD-19474	GSM485244.CEL
E-GEOD-19474	GSM485238.CEL
E-GEOD-19474	GSM485247.CEL
E-GEOD-19474	GSM485245.CEL
E-GEOD-19474	GSM485243.CEL
E-GEOD-19474	GSM485246.CEL
E-GEOD-18597	GSM462487_EMN-SC_SOD126d-3MP-s2.CEL
E-GEOD-18597	GSM462486_EMN-SC_SOD126d-2MP-s2.CEL
E-GEOD-18597	GSM462485_EMN-SC_SOD126d-1MP-s2.CEL
E-GEOD-18597	GSM462484_EMN-SC_SOD112d-3MP-s2.CEL
E-GEOD-18597	GSM462483_EMN-SC_SOD112d-2MP-s2.CEL
E-GEOD-18597	GSM462482_EMN-SC_SOD112d-1MP-s2.CEL
E-GEOD-18597	GSM462481_EMN-SC_SOD98d-3MP-s2.CEL
E-GEOD-18597	GSM462480_EMN-SC_SOD98d-2MP-s2.CEL
E-GEOD-18597	GSM462479_EMN-SC_SOD98d-1MP-s2.CEL
E-GEOD-18597	GSM462478_EMN-SC_SOD70d-3MP-s2.CEL
E-GEOD-18597	GSM462477_EMN-SC_SOD70d-2MP-s2.CEL
E-GEOD-18597	GSM462476_EMN-SC_SOD70d-1MP-s2.CEL
E-GEOD-18597	GSM462475_EMN-SC_SOD56d-3MP-s2.CEL
E-GEOD-18597	GSM462474_EMN-SC_SOD56d-2MP-s2.CEL
E-GEOD-18597	GSM462473_EMN-SC_SOD56d-1MP-s2.CEL
E-GEOD-18597	GSM462472_EMN-SC_SOD42d-3MP-s2.CEL
E-GEOD-18597	GSM462471_EMN-SC_SOD42d-2MP-s2.CEL
E-GEOD-18597	GSM462470_EMN-SC_SOD42d-1MP-s2.CEL
E-GEOD-18597	GSM462469_EMN-SC_SOD28d-3MP-s2.CEL
E-GEOD-18597	GSM462468_EMN-SC_SOD28d-2MP-s2.CEL
E-GEOD-18597	GSM462467_EMN-SC_SOD28d-1MP-s2.CEL
E-GEOD-18597	GSM462466_EMN-SC_Ctr126d-3MP-s2.CEL
E-GEOD-18597	GSM462465_EMN-SC_Ctr126d-2MP-s2.CEL
E-GEOD-18597	GSM462464_EMN-SC_Ctr126d-1MP-s2.CEL
E-GEOD-18597	GSM462463_EMN-SC_Ctr112d-3MP-s2.CEL
E-GEOD-18597	GSM462462_EMN-SC_Ctr112d-2MP-s2.CEL
E-GEOD-18597	GSM462461_EMN-SC_Ctr112d-1MP-s2.CEL
E-GEOD-18597	GSM462460_EMN-SC_Ctr98d-3MP-s2.CEL
E-GEOD-18597	GSM462459_EMN-SC_Ctr98d-2MP-s2.CEL
E-GEOD-18597	GSM462458_EMN-SC_Ctr98d-1MP-s2.CEL
E-GEOD-18597	GSM462457_EMN-SC_Ctr70d-3MP-s2.CEL
E-GEOD-18597	GSM462456_EMN-SC_Ctr70d-2MP-s2.CEL
E-GEOD-18597	GSM462455_EMN-SC_Ctr70d-1MP-s2.CEL
E-GEOD-18597	GSM462454_EMN-SC_Ctr56d-3MP-s2.CEL
E-GEOD-18597	GSM462453_EMN-SC_Ctr56d-2MP-s2.CEL
E-GEOD-18597	GSM462452_EMN-SC_Ctr56d-1MP-s2.CEL
E-GEOD-18597	GSM462451_EMN-SC_Ctr42d-3MP-s2.CEL
E-GEOD-18597	GSM462450_EMN-SC_Ctr42d-2MP-s2.CEL
E-GEOD-18597	GSM462449_EMN-SC_Ctr42d-1MP-s2.CEL
E-GEOD-18597	GSM462448_EMN-SC_Ctr28d-3MP-s2.CEL
E-GEOD-18597	GSM462447_EMN-SC_Ctr28d-2MP-s2.CEL
E-GEOD-18597	GSM462446_EMN-SC_Ctr28d-1MP-s2.CEL
E-MEXP-1717	3211_TBP057_mSC_PLA_49dpn_121206_Mouse430_2.CEL
E-MEXP-1717	3210_TBP056_mSC_PLA_49dpn_131206_Mouse430_2.CEL
E-MEXP-1717	3207_TBP003_mSC_PLA_49dpn_121206_Mouse430_2.CEL
E-MEXP-1717	3206_TBP002_mSC_PLA_49dpn_131206_Mouse430_2.CEL
E-MEXP-1717	3209_TBP005_mSC_PLA_49dpn_121206_Mouse430_2.CEL
E-MEXP-1717	3208_TBP004_mSC_PLA_49dpn_131206_Mouse430_2.CEL
E-MEXP-1717	3231_TBI030_mSC_INF_49dpn_141206_Mouse430_2.CEL
E-MEXP-1717	3233_TBI032_mSC_INF_49dpn_141206_Mouse430_2.CEL
E-MEXP-1717	3234_TBI074_mSC_INF_49dpn_131206_Mouse430_2.CEL
E-MEXP-1717	3235_TBI075_mSC_INF_49dpn_141206_Mouse430_2.CEL
E-MEXP-1717	3230_TBI029_mSC_INF_49dpn_131206_Mouse430_2.CEL
E-MEXP-1717	3277_TAI159_mSC_INF_49dpn_141206_Mouse430_2.CEL
E-MEXP-1717	3215_TBP009_mSC_CON_77dpn_121206_Mouse430_2.CEL
E-MEXP-1717	3214_TBP008_mSC_PLA_77dpn_131206_Mouse430_2.CEL
E-MEXP-1717	3217_TBP059_mSC_PLA_77dpn_131206_Mouse430_2.CEL
E-MEXP-1717	3216_TBP058_mSC_PLA_77dpn_121206_Mouse430_2.CEL
E-MEXP-1717	3213_TBP007_mSC_PLA_77dpn_121206_Mouse430_2.CEL
E-MEXP-1717	3212_TBP006_mSC_PLA_77dpn_141206_Mouse430_2.CEL
E-MEXP-1717	3236_TBI033_mSC_INF_77dpn_141206_Mouse430_2.CEL
E-MEXP-1717	3237_TBI034_mSC_INF_77dpn_121206_Mouse430_2.CEL
E-MEXP-1717	3240_TBI076_mSC_INF_77dpn_141206_Mouse430_2.CEL
E-MEXP-1717	3238_TBI035_mSC_INF_77dpn_131206_Mouse430_2.CEL
E-MEXP-1717	3241_TBI077_mSC_INF_77dpn_131206_Mouse430_2.CEL
E-MEXP-1717	3239_TBI036_mSC_INF_77dpn_141206_Mouse430_2.CEL
E-MEXP-1717	3219WDH1_TBP011_mSC_PLA_133dpn_131206_Mouse430_2.CEL
E-MEXP-1717	3218WDH1_TBP010_mSC_PLA_133dpn_131206_Mouse430_2.CEL
E-MEXP-1717	3221_TBP013_mSC_PLA_133dpn_121206_Mouse430_2.CEL
E-MEXP-1717	3220WDH1_TBP012_mSC_PLA_133dpn_121206_Mouse430_2.CEL
E-MEXP-1717	3222WDH2_TBP060_mSC_PLA_133dpn_201206_Mouse430_2.CEL
E-MEXP-1717	3223WDH1_TBP061_mSC_PLA_133d_131206_Mouse430_2.CEL
E-MEXP-1717	3243WDH1_TBI038_mSC_INF_133dpn_121206_Mouse430_2.CEL
E-MEXP-1717	3245WDH1_TBI040_mSC_INF_133dpn_131206_Mouse430_2.CEL
E-MEXP-1717	3246WDH1_TBI078_mSC_INF_133dpn_131206_Mouse430_2.CEL
E-MEXP-1717	3247WDH1_TBI079_mSC_INF_133dpn_141206_Mouse430_2.CEL
E-MEXP-1717	3316_TBI039_mSC_INF_133dpn_201206_Mouse430_2.CEL
E-MEXP-1717	3226_TBP020_mSC_PLA_231dpn_131206_Mouse430_2.CEL
E-MEXP-1717	3227_TBP025_mSC_PLA_231dpn_121206_Mouse430_2.CEL
E-MEXP-1717	3275_TBP066_mSC_PLA_231dpn_121206_Mouse430_2.CEL
E-MEXP-1717	3228_TBP064_mSC_PLA_231dpn_121206_Mouse430_2.CEL
E-MEXP-1717	3224_TBP018_mSC_PLA_231dpn_131206_Mouse430_2.CEL
E-MEXP-1717	3225_TBP019_mSC_PLA_231dpn_121206_Mouse430_2.CEL
E-MEXP-1717	3248_TBI049_mSC_INF_231dpn_141206_Mouse430_2.CEL
E-MEXP-1717	3249_TBI050_mSC_INF_231dpn_141206_Mouse430_2.CEL
E-MEXP-1717	3252_TBI082_mSC_INF_231dpn_141206_Mouse430_2.CEL
E-MEXP-1717	3250_TBI051_mSC_INF_231dpn_141206_Mouse430_2.CEL
E-MEXP-1717	3251_TBI053_mSC_INF_231dpn_131206_Mouse430_2.CEL
E-MEXP-1717	3280_TBI083_mSC_INF_231dpn_121206_Mouse430_2.CEL
E-GEOD-15303	GSM387049.CEL
E-GEOD-15303	GSM387048.CEL
E-GEOD-15303	GSM387047.CEL
E-GEOD-15303	GSM387046.CEL
E-GEOD-15303	GSM387045.CEL
E-GEOD-15303	GSM387044.CEL
E-GEOD-15303	GSM387043.CEL
E-GEOD-15303	GSM387042.CEL
E-GEOD-15303	GSM387041.CEL
E-GEOD-15303	GSM387040.CEL
E-GEOD-15303	GSM387039.CEL
E-GEOD-13379	GSM337790.cel
E-GEOD-13379	GSM337789.cel
E-GEOD-13379	GSM337788.cel
E-GEOD-13379	GSM337787.cel
E-GEOD-13379	GSM337786.cel
E-GEOD-13379	GSM337785.cel
E-GEOD-5038	GSM113717.cel
E-GEOD-5038	GSM113719.cel
E-GEOD-5038	GSM113716.cel
E-GEOD-5038	GSM113721.cel
E-GEOD-5038	GSM113715.cel
E-GEOD-5038	GSM113718.cel
E-GEOD-5038	GSM113714.cel
E-GEOD-5038	GSM113722.cel
E-GEOD-5038	GSM113720.cel
E-MEXP-1492	Null_hnl_HZ_691_MA2_3636.cel
E-MEXP-1492	Het_hnl_HZ_691_MA2_3641.cel
E-MEXP-1492	Null_hnl_HZ_691_MA2_3643.cel
E-MEXP-1492	Null_hnl_HZ_691_MA2_3638.cel
E-MEXP-1492	Het_hnl_HZ_691_MA2_3635.cel
E-MEXP-1492	Het_hnl_HZ_691_MA2_3644.cel
E-MEXP-1492	Null_hnl_HZ_691_MA2_3639.cel
E-MEXP-1492	Het_hnl_HZ_691_MA2_3633.cel
E-MEXP-1492	Het_hnl_HZ_691_MA2_3634.cel
E-MEXP-1492	Null_hnl_HZ_691_MA2_3637.cel
E-GEOD-5296	GSM119789.CEL
E-GEOD-5296	GSM119856.CEL
E-GEOD-5296	GSM120018.CEL
E-GEOD-5296	GSM119842.CEL
E-GEOD-5296	GSM119784.CEL
E-GEOD-5296	GSM119803.CEL
E-GEOD-5296	GSM119843.CEL
E-GEOD-5296	GSM119849.CEL
E-GEOD-5296	GSM119841.CEL
E-GEOD-5296	GSM119785.CEL
E-GEOD-5296	GSM119812.CEL
E-GEOD-5296	GSM119777.CEL
E-GEOD-5296	GSM119853.CEL
E-GEOD-5296	GSM119815.CEL
E-GEOD-5296	GSM119847.CEL
E-GEOD-5296	GSM119851.CEL
E-GEOD-5296	GSM119846.CEL
E-GEOD-5296	GSM119773.CEL
E-GEOD-5296	GSM119800.CEL
E-GEOD-5296	GSM119786.CEL
E-GEOD-5296	GSM119831.CEL
E-GEOD-5296	GSM119796.CEL
E-GEOD-5296	GSM119830.CEL
E-GEOD-5296	GSM119817.CEL
E-GEOD-5296	GSM119799.CEL
E-GEOD-5296	GSM119814.CEL
E-GEOD-5296	GSM119826.CEL
E-GEOD-5296	GSM119782.CEL
E-GEOD-5296	GSM119793.CEL
E-GEOD-5296	GSM119771.CEL
E-GEOD-5296	GSM119834.CEL
E-GEOD-5296	GSM119766.CEL
E-GEOD-5296	GSM119833.CEL
E-GEOD-5296	GSM118664.CEL
E-GEOD-5296	GSM119764.CEL
E-GEOD-5296	GSM119770.CEL
E-GEOD-5296	GSM119844.CEL
E-GEOD-5296	GSM119850.CEL
E-GEOD-5296	GSM119824.CEL
E-GEOD-5296	GSM119792.CEL
E-GEOD-5296	GSM119787.CEL
E-GEOD-5296	GSM119795.CEL
E-GEOD-5296	GSM119780.CEL
E-GEOD-5296	GSM119794.CEL
E-GEOD-5296	GSM119825.CEL
E-GEOD-5296	GSM119765.CEL
E-GEOD-5296	GSM119855.CEL
E-GEOD-5296	GSM119798.CEL
E-GEOD-5296	GSM119791.CEL
E-GEOD-5296	GSM119804.CEL
E-GEOD-5296	GSM119809.CEL
E-GEOD-5296	GSM119783.CEL
E-GEOD-5296	GSM119797.CEL
E-GEOD-5296	GSM119810.CEL
E-GEOD-5296	GSM119835.CEL
E-GEOD-5296	GSM119802.CEL
E-GEOD-5296	GSM119781.CEL
E-GEOD-5296	GSM119840.CEL
E-GEOD-5296	GSM119854.CEL
E-GEOD-5296	GSM119808.CEL
E-GEOD-5296	GSM119822.CEL
E-GEOD-5296	GSM119837.CEL
E-GEOD-5296	GSM119774.CEL
E-GEOD-5296	GSM119839.CEL
E-GEOD-5296	GSM119845.CEL
E-GEOD-5296	GSM119778.CEL
E-GEOD-5296	GSM118672.CEL
E-GEOD-5296	GSM119768.CEL
E-GEOD-5296	GSM119772.CEL
E-GEOD-5296	GSM119788.CEL
E-GEOD-5296	GSM119807.CEL
E-GEOD-5296	GSM119769.CEL
E-GEOD-5296	GSM119813.CEL
E-GEOD-5296	GSM119816.CEL
E-GEOD-5296	GSM119779.CEL
E-GEOD-5296	GSM119820.CEL
E-GEOD-5296	GSM119790.CEL
E-GEOD-5296	GSM119827.CEL
E-GEOD-5296	GSM119821.CEL
E-GEOD-5296	GSM119818.CEL
E-GEOD-5296	GSM119852.CEL
E-GEOD-5296	GSM119811.CEL
E-GEOD-5296	GSM119767.CEL
E-GEOD-5296	GSM119775.CEL
E-GEOD-5296	GSM119823.CEL
E-GEOD-5296	GSM119806.CEL
E-GEOD-5296	GSM119776.CEL
E-GEOD-5296	GSM119819.CEL
E-GEOD-5296	GSM119838.CEL
E-GEOD-5296	GSM119848.CEL
E-GEOD-5296	GSM119805.CEL
E-GEOD-5296	GSM119829.CEL
E-GEOD-5296	GSM119801.CEL
E-GEOD-5296	GSM119832.CEL
E-GEOD-5296	GSM119828.CEL
E-GEOD-5296	GSM119836.CEL
