# Supplementary figures and images for: Integrated systems analysis reveals conserved gene networks underlying response to spinal cord injury
Source: eLife journal article supplement (doi:10.7554/elife.39188), 2018-10-01

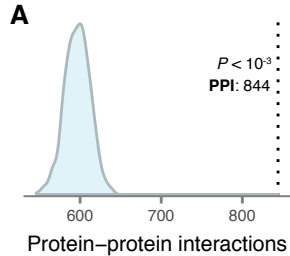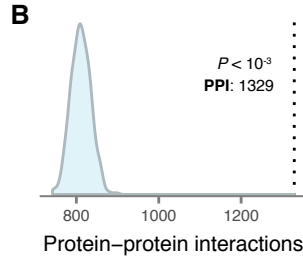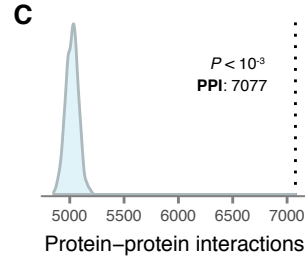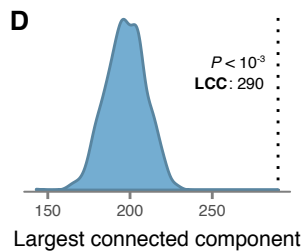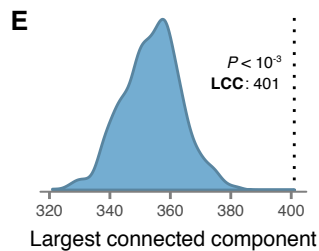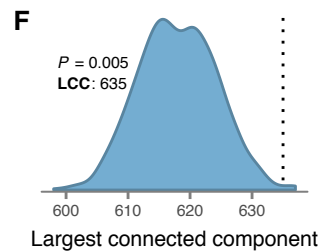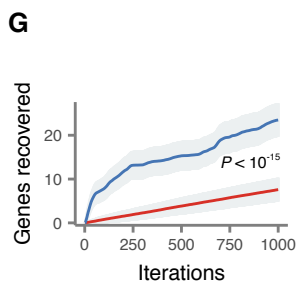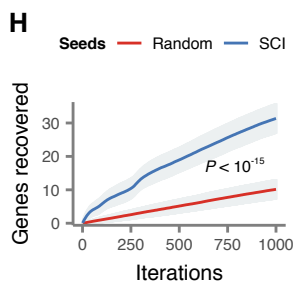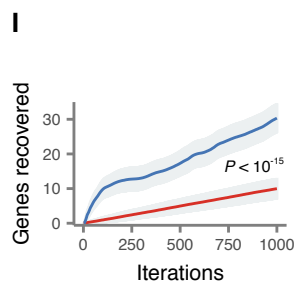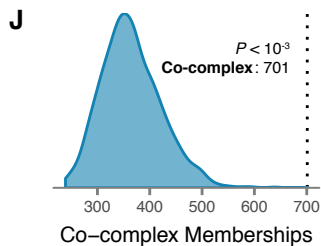

Supplement: supp [file elife-39188-supp-v1.zip]

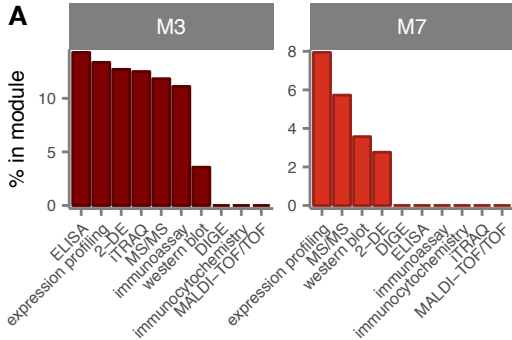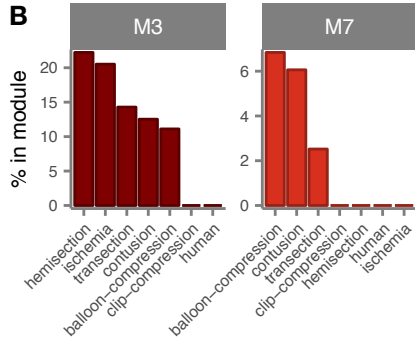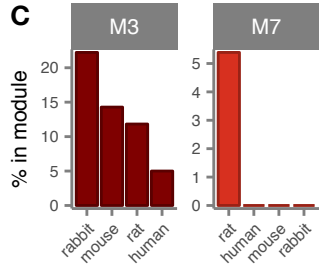

Supplement: supp [file elife-39188-supp-v1.zip]

# M1

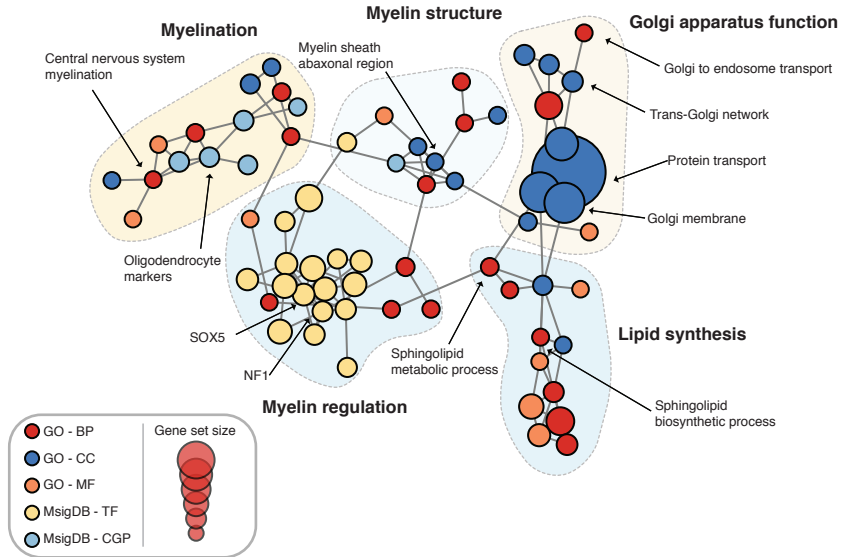

Supplement: supp [file elife-39188-supp-v1.zip]

# M6

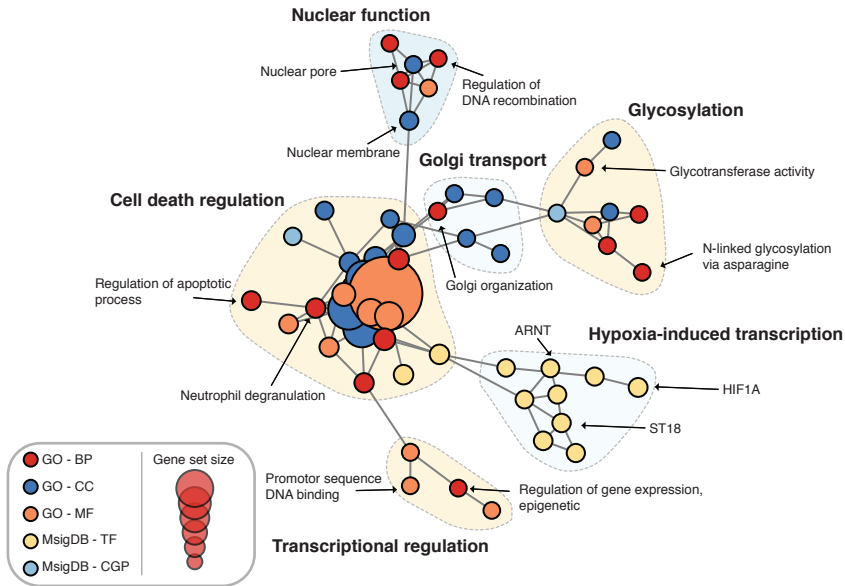

Supplement: supp [file elife-39188-supp-v1.zip]

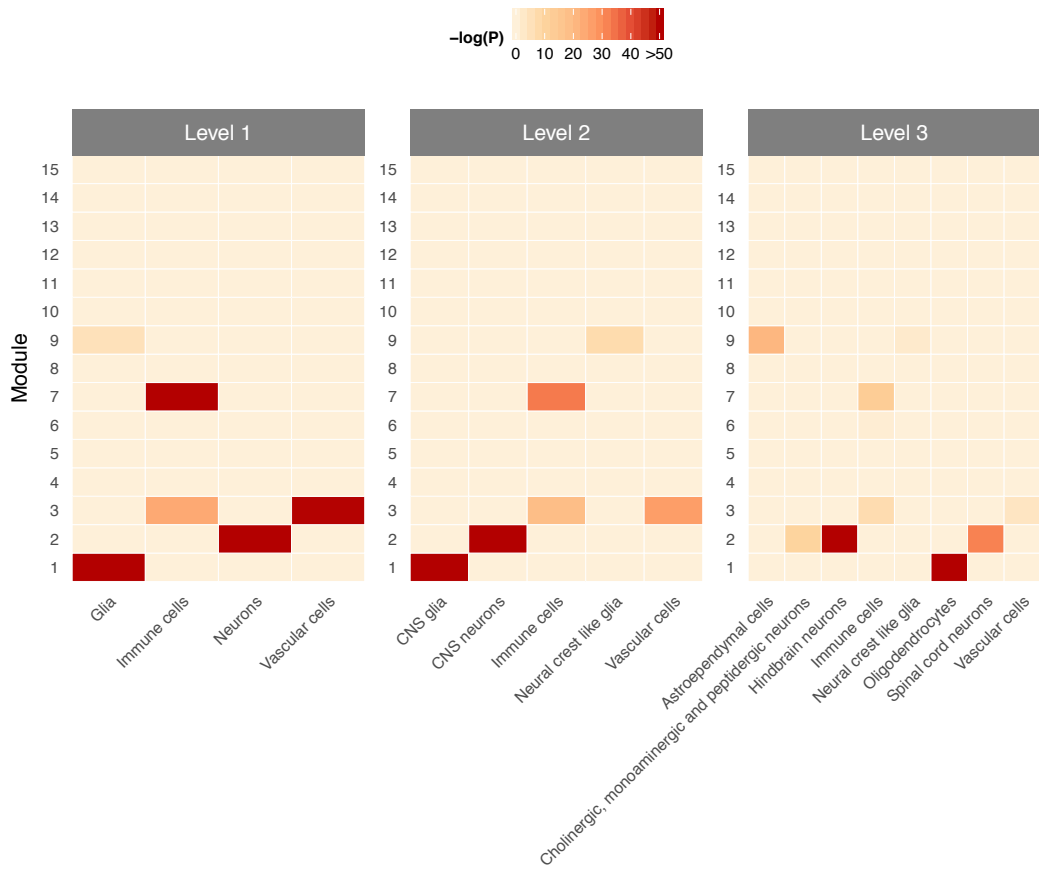

Supplement: supp [file elife-39188-supp-v1.zip]

## M2

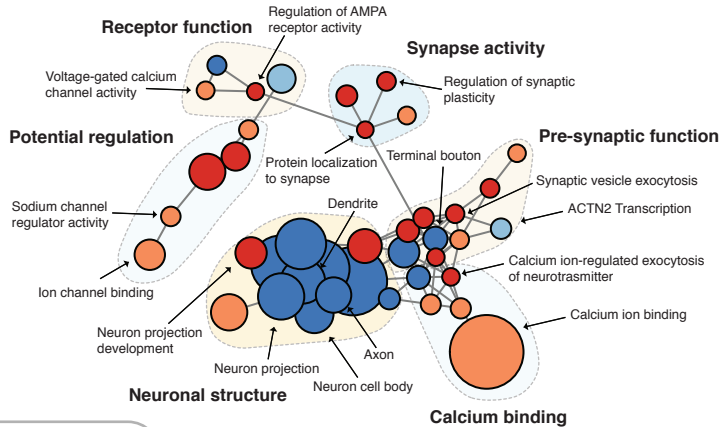

Supplement: supp [file elife-39188-supp-v1.zip]

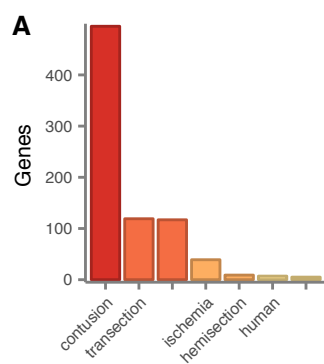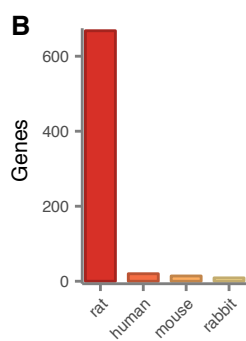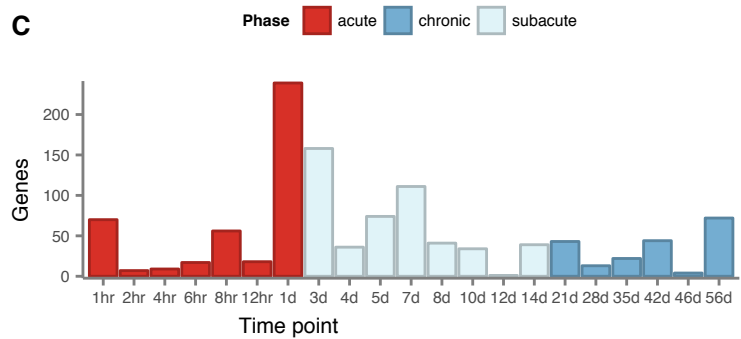

Supplement: supp [file elife-39188-supp-v1.zip]

# M11

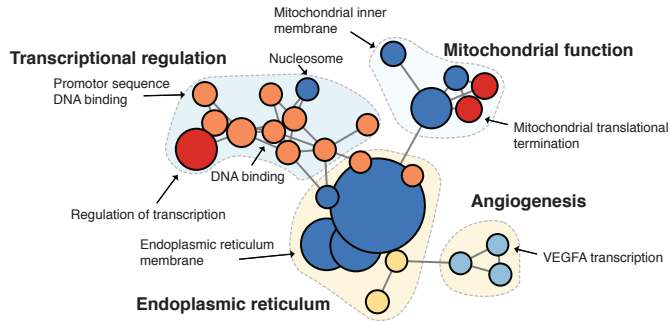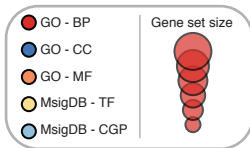

Supplement: supp [file elife-39188-supp-v1.zip]
